# Supplementary material for: Regioselectivity of Pd-catalyzedo-carborane arylation: a theoretical view
Source: Royal Society of Chemistry journal article supplement (doi:10.1039/d2qo00046f), 2022-01-01
Supplement: d2qo00046f1.pdf [file d2qo00046f1.pdf]

***Supporting Information***  
**Regioselectivity of Pd-catalyzed *o*-Carborane Arylation: A  
Theoretical View**

Jiying Liu,<sup>a</sup> Dongmin Fu,<sup>a</sup> Zitong Chen,<sup>a</sup> Tiantian Li,<sup>a</sup> Ling-Bo Qu,<sup>a</sup> Shi-Jun Li,<sup>a\*</sup>  
Wenjing Zhang,<sup>a\*</sup> and Yu Lan<sup>a,b\*</sup>

<sup>a</sup> Green Catalysis Center, and College of Chemistry, Zhengzhou University, Zhengzhou, Henan 450001, China

<sup>b</sup> School of Chemistry and Chemical Engineering, and Chongqing Key Laboratory of Theoretical and Computational Chemistry, Chongqing University, Chongqing 400030, China

E-mail: [lanyu@cqu.edu.cn](mailto:lanyu@cqu.edu.cn) (Y. Lan); [zhangwj@zzu.edu.cn](mailto:zhangwj@zzu.edu.cn) (W.-J. Zhang);  
[lishijunzong@zzu.edu.cn](mailto:lishijunzong@zzu.edu.cn) (S.-J. Li)

**Table of Contents**

|                                                                                                                                  |   |
|----------------------------------------------------------------------------------------------------------------------------------|---|
| Part 1: Complete Reference for Gaussian 09 .....                                                                                 | 2 |
| Part 2: Comparisons of relative energies calculated by fully optimization in solvent with those by single-point refinement ..... | 3 |
| Part 3: Energies, and frequencies of all the optimized structures .....                                                          | 4 |
| Part 4: Correlation between distortion of <i>o</i> -carborane and activation energy .....                                        | 6 |
| Part 5: Position of the ghost atom for NICS calculation.....                                                                     | 7 |
| Part 6: Cartesian coordination of all the optimized structures .....                                                             | 7 |

## **Part 1: Complete Reference for Gaussian 09**

Gaussian 09, Revision D.01, M. J. Frisch, G. W. Trucks, H. B. Schlegel, G. E. Scuseria, M. A. Robb, J. R. Cheeseman, G. Scalmani, V. Barone, B. Mennucci, G. A. Petersson, H. Nakatsuji, M. Caricato, X. Li, H. P. Hratchian, A. F. Izmaylov, J. Bloino, G. Zheng, J. L. Sonnenberg, M. Hada, M. Ehara, K. Toyota, R. Fukuda, J. Hasegawa, M. Ishida, T. Nakajima, Y. Honda, O. Kitao, H. Nakai, T. Vreven, J. A. Montgomery, Jr., J. E. Peralta, F. Ogliaro, M. Bearpark, J. J. Heyd, E. Brothers, K. N. Kudin, V. N. Staroverov, T. Keith, R. Kobayashi, J. Normand, K. Raghavachari, A. Rendell, J. C. Burant, S. S. Iyengar, J. Tomasi, M. Cossi, N. Rega, J. M. Millam, M. Klene, J. E. Knox, J. B. Cross, V. Bakken, C. Adamo, J. Jaramillo, R. Gomperts, R. E. Stratmann, O. Yazyev, A. J. Austin, R. Cammi, C. Pomelli, J. W. Ochterski, R. L. Martin, K. Morokuma, V. G. Zakrzewski, G. A. Voth, P. Salvador, J. J. Dannenberg, S. Dapprich, A. D. Daniels, O. Farkas, J. B. Foresman, J. V. Ortiz, J. Cioslowski, and D. J. Fox, Gaussian, Inc., Wallingford CT, 2013.

**Part 2: Comparisons of relative energies calculated by fully optimization in solvent with those by single-point refinement**

**Table S1** Comparisons of relative energies with in the gas and in hexafluoroisopropanol (HFIP) solvent by the SMD model.

| Geometry     | Optimization in the solvent <sup>1</sup> |            |                  | Optimization in the gas <sup>2</sup> |            |                  |
|--------------|------------------------------------------|------------|------------------|--------------------------------------|------------|------------------|
|              | <i>G</i>                                 | $\Delta G$ | $\Delta\Delta G$ | <i>G</i>                             | $\Delta G$ | $\Delta\Delta G$ |
| <b>AgI</b>   | -1779.662504                             |            |                  | -1779.668161                         |            |                  |
| <b>AgTFA</b> | -673.299491                              |            |                  | -673.297952                          |            |                  |
| <b>ArI</b>   | -757.070592                              |            |                  | -757.069943                          |            |                  |
| <b>HTFA</b>  | -526.815271                              |            |                  | -526.81539                           |            |                  |
| <b>4</b>     | -1767.813255                             | 0.0        |                  | -1767.811893                         | 0.0        |                  |
| <b>8-ts</b>  | -1996.148526                             | 30.5       | 0.0              | -1996.148527                         | 27.8       | 0.0              |
| <b>23-ts</b> | -1996.12883                              |            | 10.3             | -1996.132156                         |            | 12.3             |

<sup>1</sup>the thermal corrections of the Gibbs free energies obtained at *Level C*. (*Level C*: The structures were optimized by using the B3LYP density functional and mixed basis set with the solvent effects simulated by the SMD model in HFIP, i.e. the pseudopotential basis set LanL2DZ was used for Pd, Ag and I, and the split-valence basis set 6-31G(d, p) was used for other atoms) <sup>2</sup>the thermal corrections of the Gibbs free energies obtained at *Level A*.

### Part 3: Energies, and frequencies of all the optimized structures

Table S2 Absolute Energies, Enthalpies, and Free Energies

| Geometry     | $E(\text{elec-B3LYP})^1$ | $G(\text{corr-B3LYP})^2$ | $E(\text{solv, M06})^3$ | IF <sup>4</sup>  |
|--------------|--------------------------|--------------------------|-------------------------|------------------|
| <b>1</b>     | -1536.82158012           | 0.282393                 | -1537.812002            | -                |
| <b>2-ts</b>  | -1536.79785853           | 0.278532                 | -1537.798525            | 1202.78 <i>i</i> |
| <b>3</b>     | -1536.82204790           | 0.281137                 | -1537.827297            | -                |
| <b>4</b>     | -1480.94628669           | 0.367276                 | -1768.179169            | -                |
| <b>5-ts</b>  | -1480.91593794           | 0.369477                 | -1768.14886             | 156.19 <i>i</i>  |
| <b>6</b>     | -1480.92653376           | 0.370223                 | -1768.156372            | -                |
| <b>7</b>     | -1995.69336505           | 0.392236                 | -1996.56115             | -                |
| <b>8-ts</b>  | -1995.66842498           | 0.393732                 | -1996.542259            | 248.88 <i>i</i>  |
| <b>9</b>     | -1995.75901647           | 0.393467                 | -1996.623899            | -                |
| <b>10</b>    | -884.468258809           | 0.273945                 | -884.2229709            | -                |
| <b>11</b>    | -1343.41101407           | 0.385490                 | -1343.041252            | -                |
| <b>12-ts</b> | -1480.926534             | 0.370746                 | -1768.123643            | 117.04 <i>i</i>  |
| <b>13</b>    | -1480.963423             | 0.373061                 | -1768.181618            | -                |
| <b>14-ts</b> | -1995.73655805           | 0.389145                 | -1996.614296            | 1224.47 <i>i</i> |
| <b>15</b>    | -1995.75500673           | 0.392153                 | -1996.635865            | -                |
| <b>16</b>    | -1939.87677263           | 0.481001                 | -2226.986896            | -                |
| <b>17-ts</b> | -1939.85426650           | 0.480482                 | -2226.963848            | 116.89 <i>i</i>  |
| <b>18</b>    | -1939.86631697           | 0.481412                 | -2226.967512            | -                |
| <b>19</b>    | -2454.62802564           | 0.504782                 | -2455.374864            | -                |
| <b>20-ts</b> | -2454.59995058           | 0.505803                 | -2455.352657            | 255.87 <i>i</i>  |
| <b>21</b>    | -2454.69390354           | 0.506469                 | -2455.433551            | -                |
| <b>22</b>    | -1802.34506172           | 0.498116                 | -1801.849607            | -                |
| <b>23-ts</b> | -1995.650856             | 0.393791                 | -1996.522621            | 343.15 <i>i</i>  |
| <b>25-ts</b> | -2110.175876             | 0.422680                 | -2111.033432            | 313.07 <i>i</i>  |
| <b>26-ts</b> | -2110.193682             | 0.422401                 | -2111.050682            | 250.15 <i>i</i>  |
| <b>28-ts</b> | -2332.682460             | 0.394009                 | -2333.601994            | 352.38 <i>i</i>  |
| <b>29-ts</b> | -2332.698575             | 0.392470                 | -2333.621382            | 250.22 <i>i</i>  |

|              |                |           |              |                 |
|--------------|----------------|-----------|--------------|-----------------|
| <b>31-ts</b> | -1863.830422   | 0.308624  | -1864.813746 | 323.95 <i>i</i> |
| <b>32-ts</b> | -1863.833048   | 0.309509  | -1864.823784 | 249.34 <i>i</i> |
| <b>34-ts</b> | -2224.179331   | 0.306629  | -2225.151787 | 359.00 <i>i</i> |
| <b>35-ts</b> | -2224.190495   | 0.306730  | -2225.17111  | 252.04 <i>i</i> |
| <b>37-ts</b> | -4335.390758   | 0.305082  | -4339.023173 | 359.52 <i>i</i> |
| <b>38-ts</b> | -4335.403167   | 0.304680  | -4339.045318 | 252.57 <i>i</i> |
| <b>40-ts</b> | -1803.927020   | 0.345828  | -1804.878377 | 275.14 <i>i</i> |
| <b>41-ts</b> | -1803.935634   | 0.344666  | -1804.892525 | 250.48 <i>i</i> |
| <b>43-ts</b> | -1882.547046   | 0.399811  | -1883.459884 | 300.84 <i>i</i> |
| <b>44-ts</b> | -1882.562061   | 0.398616  | -1883.482821 | 247.43 <i>i</i> |
| <b>46-ts</b> | -1921.852070   | 0.426961  | -1922.742447 | 341.46 <i>i</i> |
| <b>47-ts</b> | -1921.868877   | 0.427293  | -1922.772656 | 258.25 <i>i</i> |
| <b>49-ts</b> | -1764.628598   | 0.319279  | -1765.595547 | 282.52 <i>i</i> |
| <b>50-ts</b> | -1764.616824   | 0.318987  | -1765.591761 | 252.33 <i>i</i> |
| <b>AgI</b>   | -628.979737859 | -0.054089 | -444.870416  | -               |
| <b>AgTFA</b> | -671.960976645 | -0.008875 | -673.289077  | -               |
| <b>ArI</b>   | -470.907343974 | 0.094559  | -757.164502  | -               |
| <b>HTFA</b>  | -526.781571599 | 0.007745  | -526.823016  | -               |

<sup>1</sup>The electronic energy calculated by B3LYP in gas phase. <sup>2</sup>The thermal correction to Gibbs free energy calculated by B3LYP in gas phase. <sup>3</sup>The electronic energy calculated by M06 in HFIP solvent. <sup>4</sup>The B3LYP calculated imaginary frequencies for the transition states.

#### Part 4: Correlation between distortion of *o*-carborane and activation energy

**Table S3** Relative geometry deviation, *NICS* of the *o*-carborane moiety, and free energy for the transition states of the reductive elimination for the B(3)-arylation versus the B(4)-arylation when the C(2) vertex is substituted by various groups.

| Entry     | R <sub>1</sub>          |                          | Bond Length (Å) |           |           | $\Delta MUD$<br>(Å) | <i>NICS</i><br>(ppm) | $\Delta NICS$<br>(ppm) | $\Delta\Delta G$<br>(kcal/mol) |
|-----------|-------------------------|--------------------------|-----------------|-----------|-----------|---------------------|----------------------|------------------------|--------------------------------|
|           |                         |                          | C(1)–B(3)       | C(2)–B(3) | C(1)–B(4) |                     |                      |                        |                                |
| <b>1</b>  | <b>Ph</b>               | <b>23-ts<sup>a</sup></b> | 2.05            | 2.08      | 1.74      |                     | -21.82               | 2.02                   | 12.3                           |
|           |                         | <b>8-ts<sup>b</sup></b>  | 1.70            | 1.76      | 1.84      | 0.18                | -23.84               |                        |                                |
|           |                         | <b>24<sup>c</sup></b>    | 1.72            | 1.74      | 1.70      |                     | /                    |                        |                                |
| <b>2</b>  | <b>PhOMe</b>            | <b>25-ts<sup>a</sup></b> | 1.97            | 1.99      | 1.74      |                     | -22.67               | 1.22                   | 11.0                           |
|           |                         | <b>26-ts<sup>b</sup></b> | 1.69            | 1.76      | 1.83      | 0.12                | -23.89               |                        |                                |
|           |                         | <b>27<sup>c</sup></b>    | 1.72            | 1.74      | 1.70      |                     | /                    |                        |                                |
| <b>3</b>  | <b>PhCF<sub>3</sub></b> | <b>28-ts<sup>a</sup></b> | 2.08            | 2.10      | 1.74      |                     | -22.00               | 1.80                   | 13.1                           |
|           |                         | <b>29-ts<sup>b</sup></b> | 1.70            | 1.76      | 1.84      | 0.19                | -23.80               |                        |                                |
|           |                         | <b>30<sup>c</sup></b>    | 1.72            | 1.74      | 1.70      |                     | /                    |                        |                                |
| <b>4</b>  | <b>F</b>                | <b>31-ts<sup>a</sup></b> | 2.01            | 1.94      | 1.73      |                     | -24.52               | 1.35                   | 5.7                            |
|           |                         | <b>32-ts<sup>b</sup></b> | 1.72            | 1.76      | 1.83      | 0.12                | -25.87               |                        |                                |
|           |                         | <b>33<sup>c</sup></b>    | 1.72            | 1.73      | 1.70      |                     | /                    |                        |                                |
| <b>5</b>  | <b>Cl</b>               | <b>34-ts<sup>a</sup></b> | 2.13            | 2.13      | 1.74      |                     | -22.93               | 2.25                   | 12.1                           |
|           |                         | <b>35-ts<sup>b</sup></b> | 1.71            | 1.77      | 1.84      | 0.22                | -25.18               |                        |                                |
|           |                         | <b>36<sup>c</sup></b>    | 1.72            | 1.73      | 1.70      |                     | /                    |                        |                                |
| <b>6</b>  | <b>Br</b>               | <b>37-ts<sup>a</sup></b> | 2.14            | 2.15      | 1.74      |                     | -22.65               | 2.32                   | 14.1                           |
|           |                         | <b>38-ts<sup>b</sup></b> | 1.71            | 1.76      | 1.84      | 0.23                | -24.97               |                        |                                |
|           |                         | <b>39<sup>c</sup></b>    | 1.72            | 1.73      | 1.70      |                     | /                    |                        |                                |
| <b>7</b>  | <b>Me</b>               | <b>40-ts<sup>a</sup></b> | 1.90            | 1.87      | 1.73      |                     | -23.84               | 0.88                   | 9.6                            |
|           |                         | <b>41-ts<sup>b</sup></b> | 1.71            | 1.76      | 1.84      | 0.06                | -24.71               |                        |                                |
|           |                         | <b>42<sup>c</sup></b>    | 1.71            | 1.73      | 1.70      |                     | /                    |                        |                                |
| <b>8</b>  | <b><i>i</i>-Pr</b>      | <b>43-ts<sup>a</sup></b> | 1.97            | 1.99      | 1.74      |                     | -23.35               | 1.00                   | 15.1                           |
|           |                         | <b>44-ts<sup>b</sup></b> | 1.70            | 1.76      | 1.84      | 0.13                | -24.35               |                        |                                |
|           |                         | <b>45<sup>c</sup></b>    | 1.71            | 1.74      | 1.70      |                     | /                    |                        |                                |
| <b>9</b>  | <b><i>t</i>-Bu</b>      | <b>46-ts<sup>a</sup></b> | 2.21            | 2.34      | 1.76      |                     | -21.67               | 2.33                   | 18.7                           |
|           |                         | <b>47-ts<sup>b</sup></b> | 1.70            | 1.78      | 1.87      | 0.32                | -24.00               |                        |                                |
|           |                         | <b>48<sup>c</sup></b>    | 1.70            | 1.74      | 1.69      |                     | /                    |                        |                                |
| <b>10</b> | <b>H</b>                | <b>49-ts<sup>a</sup></b> | 1.91            | 1.83      | 1.72      |                     | -24.37               | 0.55                   | -2.2                           |
|           |                         | <b>50-ts<sup>b</sup></b> | 1.72            | 1.75      | 1.83      | 0.05                | -24.92               |                        |                                |
|           |                         | <b>51<sup>c</sup></b>    | 1.72            | 1.72      | 1.70      |                     | /                    |                        |                                |

<sup>a</sup> Transition state of the reductive elimination for the B(3)-arylation. <sup>b</sup> Transition state of the reductive elimination for the B(4)-arylation. <sup>c</sup> *o*-carborane with C(2) vertex substituted.

## Part 5: Position of the ghost atom for NICS calculation

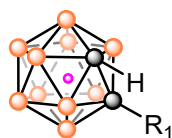

Scheme S1 Position of the ghost atom in the optimized structure

## Part 6: Cartesian coordination of all the optimized structures

1

Zero-point correction= 0.341463

Thermal correction to Energy= 0.368465

Thermal correction to Enthalpy= 0.369409

Thermal correction to Gibbs Free Energy= 0.282393

Sum of electronic and zero-point Energies= -1536.480117

Sum of electronic and thermal Energies= -1536.453115

Sum of electronic and thermal Enthalpies= -1536.452171

Sum of electronic and thermal Free Energies= -1536.539187

Cartesian coordinates

|   |           |           |           |
|---|-----------|-----------|-----------|
| B | 0.359482  | -3.224561 | 0.360839  |
| B | 3.102000  | -2.820592 | -0.431527 |
| B | 1.494769  | -3.298284 | -1.021800 |
| B | 2.085797  | -1.664297 | -1.321265 |
| B | 2.031111  | -3.779179 | 0.615379  |
| B | 1.279079  | -2.666299 | 1.793487  |
| B | 2.970107  | -2.430476 | 1.298771  |
| B | 1.872857  | -1.040028 | 1.457683  |
| H | 2.372254  | -1.145685 | -2.340956 |
| H | 2.020259  | -0.130688 | 2.192354  |
| H | -0.662890 | -0.938582 | 1.329782  |
| H | 1.005574  | -2.970799 | 2.904712  |
| H | 3.919488  | -2.471136 | 2.001848  |
| H | 2.303824  | -4.899388 | 0.887588  |
| H | 4.140700  | -3.128137 | -0.904384 |
| H | 1.379275  | -4.055208 | -1.925335 |
| H | -0.577991 | -3.941783 | 0.452387  |
| H | -0.441378 | -1.587181 | -1.619301 |
| C | 4.101132  | -0.235399 | -0.029377 |
| C | 4.779573  | -0.101013 | -1.252649 |
| C | 4.553711  | 0.505713  | 1.074972  |
| C | 5.865359  | 0.765450  | -1.371058 |

|    |           |           |           |
|----|-----------|-----------|-----------|
| H  | 4.470915  | -0.684247 | -2.111621 |
| C  | 5.639461  | 1.371566  | 0.951843  |
| H  | 4.068268  | 0.399504  | 2.037241  |
| C  | 6.296109  | 1.508787  | -0.271621 |
| H  | 6.376773  | 0.852480  | -2.324711 |
| H  | 5.972990  | 1.934650  | 1.817900  |
| H  | 7.141787  | 2.183176  | -0.365329 |
| C  | 1.216004  | 0.756293  | -0.479191 |
| H  | 2.169747  | 1.237579  | -0.709569 |
| N  | 0.156527  | 1.469046  | -0.520107 |
| C  | 0.287055  | 2.908823  | -0.798534 |
| H  | -0.146164 | 3.109008  | -1.785198 |
| H  | 1.330404  | 3.236894  | -0.792377 |
| C  | -0.535644 | 3.696513  | 0.245784  |
| O  | -0.260849 | 4.845928  | 0.514968  |
| O  | -1.539444 | 3.017408  | 0.759020  |
| Pd | -1.809908 | 1.193742  | 0.015727  |
| O  | -2.667254 | -0.658134 | -0.667547 |
| C  | -3.757734 | -0.289631 | -0.140666 |
| O  | -3.841471 | 0.834324  | 0.438914  |
| C  | -4.970540 | -1.232183 | -0.167531 |
| C  | 2.957444  | -1.211820 | 0.108881  |
| C  | 1.316489  | -0.686159 | -0.133261 |
| B  | 0.255053  | -1.534902 | 0.887439  |
| B  | 0.383091  | -1.922711 | -0.846527 |
| F  | -4.847476 | -2.141193 | 0.815839  |
| F  | -6.106971 | -0.552937 | 0.015263  |
| F  | -5.030979 | -1.877769 | -1.339825 |

## 2-ts

Zero-point correction= 0.336866

Thermal correction to Energy= 0.363537

Thermal correction to Enthalpy= 0.364481

Thermal correction to Gibbs Free Energy= 0.278532

Sum of electronic and zero-point Energies= -1536.460992

Sum of electronic and thermal Energies= -1536.434322

Sum of electronic and thermal Enthalpies= -1536.433378

Sum of electronic and thermal Free Energies= -1536.519326

## Cartesian coordinates

|   |           |           |           |
|---|-----------|-----------|-----------|
| B | 0.134511  | -2.705966 | -0.967508 |
| B | -1.866350 | -2.410139 | 1.085291  |
| B | -0.116150 | -2.310107 | 0.755999  |
| B | -1.073462 | -0.842880 | 0.849058  |



|    |           |           |           |
|----|-----------|-----------|-----------|
| B  | -1.114985 | -3.566007 | -0.037894 |
| B  | -1.464190 | -3.024381 | -1.706512 |
| B  | -2.693763 | -2.851976 | -0.430963 |
| B  | -2.419247 | -1.549175 | -1.605512 |
| H  | -1.057746 | 0.027878  | 1.639718  |
| H  | -3.221684 | -1.108692 | -2.348860 |
| H  | -0.342061 | -0.967073 | -2.964370 |
| H  | -1.623159 | -3.764308 | -2.617407 |
| H  | -3.754728 | -3.371899 | -0.402682 |
| H  | -1.027642 | -4.712512 | 0.245957  |
| H  | -2.378673 | -2.623155 | 2.128718  |
| H  | 0.674386  | -2.546496 | 1.605473  |
| H  | 1.115569  | -3.232779 | -1.362443 |
| H  | 1.653788  | -0.763036 | -0.684907 |
| C  | -3.843879 | -0.466389 | 0.526594  |
| C  | -3.854463 | 0.295912  | 1.705267  |
| C  | -5.026175 | -0.557849 | -0.226189 |
| C  | -5.008898 | 0.969740  | 2.103198  |
| H  | -2.968630 | 0.358786  | 2.324491  |
| C  | -6.178493 | 0.115387  | 0.176556  |
| H  | -5.054182 | -1.166954 | -1.121624 |
| C  | -6.172954 | 0.886842  | 1.339128  |
| H  | -4.994776 | 1.554793  | 3.017485  |
| H  | -7.082002 | 0.029505  | -0.419191 |
| H  | -7.070699 | 1.411259  | 1.651818  |
| C  | -1.567285 | 1.015871  | -1.080407 |
| H  | -2.525719 | 1.430158  | -1.394564 |
| N  | -0.516277 | 1.729903  | -0.966776 |
| C  | -0.453563 | 3.167863  | -1.215909 |
| H  | -1.426909 | 3.646902  | -1.076222 |
| H  | -0.131895 | 3.317593  | -2.253594 |
| C  | 0.631875  | 3.818510  | -0.311092 |
| O  | 0.600456  | 5.021600  | -0.141600 |
| O  | 1.531861  | 2.993674  | 0.153760  |
| Pd | 1.204903  | 1.003264  | -0.195387 |
| O  | 2.931680  | -1.296959 | -0.692518 |
| C  | 3.503136  | -0.564907 | 0.155123  |
| O  | 3.027961  | 0.488691  | 0.660519  |
| C  | 4.884697  | -1.008081 | 0.683103  |
| C  | -2.611261 | -1.227663 | 0.092308  |
| C  | -1.419704 | -0.432532 | -0.792963 |
| B  | -0.664871 | -1.454689 | -1.936573 |
| B  | 0.174001  | -0.994060 | -0.420441 |
| F  | 5.682217  | 0.047761  | 0.877358  |

|   |          |           |           |
|---|----------|-----------|-----------|
| F | 5.481946 | -1.847093 | -0.169381 |
| F | 4.712929 | -1.641202 | 1.857926  |

### 3

Zero-point correction= 0.341970

Thermal correction to Energy= 0.369448

Thermal correction to Enthalpy= 0.370392

Thermal correction to Gibbs Free Energy= 0.281137

Sum of electronic and zero-point Energies= -1536.480078

Sum of electronic and thermal Energies= -1536.452600

Sum of electronic and thermal Enthalpies= -1536.451656

Sum of electronic and thermal Free Energies= -1536.540911

#### Cartesian coordinates

|   |           |           |           |
|---|-----------|-----------|-----------|
| B | 0.150616  | -2.481878 | -0.840156 |
| B | -2.035592 | -2.382509 | 1.036724  |
| B | -0.265577 | -2.196603 | 0.872035  |
| B | -1.292993 | -0.774537 | 0.947557  |
| B | -1.137082 | -3.444787 | -0.071143 |
| B | -1.367471 | -2.827948 | -1.733561 |
| B | -2.709235 | -2.771704 | -0.565831 |
| B | -2.394168 | -1.396277 | -1.642393 |
| H | -1.379016 | 0.054281  | 1.779074  |
| H | -3.145784 | -0.950671 | -2.434171 |
| H | -0.248194 | -0.671922 | -2.787449 |
| H | -1.416700 | -3.524055 | -2.690989 |
| H | -3.743169 | -3.337660 | -0.656316 |
| H | -1.027961 | -4.601965 | 0.159564  |
| H | -2.622963 | -2.676869 | 2.019419  |
| H | 0.450271  | -2.456890 | 1.780337  |
| H | 1.186811  | -2.953828 | -1.176538 |
| H | 2.580532  | -0.626871 | -1.441784 |
| C | -4.043979 | -0.493706 | 0.411464  |
| C | -4.192654 | 0.178106  | 1.634850  |
| C | -5.148630 | -0.570644 | -0.452263 |
| C | -5.405395 | 0.779108  | 1.970986  |
| H | -3.368186 | 0.225388  | 2.334955  |
| C | -6.359588 | 0.030253  | -0.111876 |
| H | -5.069959 | -1.112364 | -1.387064 |
| C | -6.491258 | 0.712666  | 1.097977  |
| H | -5.498476 | 1.294823  | 2.921738  |
| H | -7.201373 | -0.042441 | -0.793670 |
| H | -7.434774 | 1.180512  | 1.362113  |
| C | -1.598189 | 1.174663  | -0.901724 |

|    |           |           |           |
|----|-----------|-----------|-----------|
| H  | -2.527428 | 1.655942  | -1.208108 |
| N  | -0.502764 | 1.819643  | -0.753849 |
| C  | -0.349364 | 3.260722  | -0.980687 |
| H  | -1.256834 | 3.800897  | -0.695181 |
| H  | -0.177901 | 3.412476  | -2.053140 |
| C  | 0.904289  | 3.845877  | -0.244743 |
| O  | 0.933140  | 5.061173  | -0.124294 |
| O  | 1.801999  | 2.984580  | 0.104522  |
| Pd | 1.163934  | 0.937195  | -0.041220 |
| O  | 3.474065  | -0.948077 | -1.178984 |
| C  | 3.688556  | -0.587142 | 0.063014  |
| O  | 2.938341  | 0.081826  | 0.762415  |
| C  | 5.023337  | -1.123236 | 0.617491  |
| C  | -2.744695 | -1.174844 | 0.045240  |
| C  | -1.513307 | -0.293448 | -0.680480 |
| B  | -0.625935 | -1.221591 | -1.809240 |
| B  | 0.070357  | -0.812314 | -0.209317 |
| F  | 5.278284  | -0.585461 | 1.806196  |
| F  | 6.018689  | -0.828636 | -0.227565 |
| F  | 4.938560  | -2.456213 | 0.742716  |

#### 4

Zero-point correction= 0.435418

Thermal correction to Energy= 0.467745

Thermal correction to Enthalpy= 0.468689

Thermal correction to Gibbs Free Energy= 0.367276

Sum of electronic and zero-point Energies= -1480.510869

Sum of electronic and thermal Energies= -1480.478542

Sum of electronic and thermal Enthalpies= -1480.477598

Sum of electronic and thermal Free Energies= -1480.579011

#### Cartesian coordinates

|   |          |           |           |
|---|----------|-----------|-----------|
| B | 2.220856 | -2.588268 | 0.982475  |
| B | 4.218070 | -1.926414 | -0.986289 |
| B | 2.485648 | -2.287621 | -0.756945 |
| B | 3.014154 | -0.624671 | -0.944286 |
| B | 3.725159 | -3.147871 | 0.206664  |
| B | 3.794745 | -2.395147 | 1.825658  |
| B | 5.023554 | -1.994786 | 0.601374  |
| B | 4.321011 | -0.724925 | 1.623321  |
| H | 2.829562 | 0.145542  | -1.816327 |
| H | 4.912672 | -0.028886 | 2.368204  |
| H | 2.084641 | -0.630592 | 2.820061  |
| H | 4.083176 | -2.984518 | 2.812131  |

|    |           |           |           |
|----|-----------|-----------|-----------|
| H  | 6.185084  | -2.203437 | 0.673619  |
| H  | 3.974185  | -4.293644 | 0.033313  |
| H  | 4.842825  | -2.083213 | -1.977687 |
| H  | 1.865316  | -2.810085 | -1.622258 |
| H  | 1.392074  | -3.336307 | 1.383305  |
| C  | 5.547200  | 0.517062  | -0.569038 |
| C  | 5.545834  | 0.932361  | -1.910152 |
| C  | 6.533139  | 1.027001  | 0.290729  |
| C  | 6.488801  | 1.849980  | -2.371018 |
| H  | 4.815740  | 0.530231  | -2.601697 |
| C  | 7.473372  | 1.946470  | -0.173529 |
| H  | 6.580548  | 0.698008  | 1.321432  |
| C  | 7.452391  | 2.365538  | -1.503856 |
| H  | 6.469920  | 2.156242  | -3.412432 |
| H  | 8.227559  | 2.327658  | 0.508190  |
| H  | 8.186458  | 3.080002  | -1.863893 |
| C  | 2.766686  | 1.437015  | 0.760508  |
| H  | 3.522185  | 2.190038  | 0.989412  |
| N  | 1.535238  | 1.721771  | 0.572263  |
| C  | 0.982171  | 3.077435  | 0.651101  |
| H  | 1.241752  | 3.604072  | -0.275128 |
| H  | 1.414835  | 3.628317  | 1.491343  |
| C  | -0.575449 | 3.086886  | 0.752410  |
| O  | -1.091446 | 4.150072  | 1.063058  |
| O  | -1.168511 | 1.978568  | 0.446026  |
| Pd | 0.139083  | 0.261163  | 0.239994  |
| C  | 4.543682  | -0.505467 | -0.085422 |
| C  | 3.118711  | -0.003746 | 0.648590  |
| B  | 2.589712  | -1.093052 | 1.855804  |
| B  | 1.761233  | -1.014749 | 0.269665  |
| C  | -3.586682 | -0.961220 | -0.237475 |
| C  | -3.797061 | 0.387897  | 0.022770  |
| C  | -4.618258 | -1.850672 | -0.535744 |
| C  | -5.113142 | 0.857412  | -0.020614 |
| H  | -2.980490 | 1.069826  | 0.247008  |
| C  | -5.920862 | -1.359499 | -0.572574 |
| H  | -4.423770 | -2.898737 | -0.735786 |
| C  | -6.174364 | -0.006211 | -0.315681 |
| H  | -5.307322 | 1.905198  | 0.177634  |
| H  | -6.754668 | -2.014841 | -0.800481 |
| I  | -1.583644 | -1.786899 | -0.184102 |
| C  | -7.592595 | 0.454978  | -0.372540 |
| O  | -8.537125 | -0.267058 | -0.627337 |
| O  | -7.715322 | 1.772851  | -0.108536 |

|   |           |          |           |
|---|-----------|----------|-----------|
| C | -9.056440 | 2.285624 | -0.145822 |
| H | -9.494818 | 2.142703 | -1.136646 |
| H | -9.682025 | 1.778427 | 0.592862  |
| H | -8.971054 | 3.346763 | 0.086893  |

### 5-ts

Zero-point correction= 0.434282

Thermal correction to Energy= 0.465971

Thermal correction to Enthalpy= 0.466915

Thermal correction to Gibbs Free Energy= 0.369477

Sum of electronic and zero-point Energies= -1480.481656

Sum of electronic and thermal Energies= -1480.449967

Sum of electronic and thermal Enthalpies= -1480.449023

Sum of electronic and thermal Free Energies= -1480.546461

### Cartesian coordinates

|   |          |           |           |
|---|----------|-----------|-----------|
| B | 2.048400 | -2.319422 | -1.655602 |
| B | 3.014312 | 0.311296  | -2.337940 |
| B | 1.568744 | -0.734372 | -2.323506 |
| B | 1.788876 | 0.476319  | -1.067265 |
| B | 3.175928 | -1.421707 | -2.704289 |
| B | 3.792908 | -2.239686 | -1.240868 |
| B | 4.382789 | -0.616430 | -1.674101 |
| B | 4.006254 | -1.017844 | 0.011428  |
| H | 1.173349 | 1.454603  | -0.843572 |
| H | 4.761779 | -0.985411 | 0.915937  |
| H | 2.420126 | -2.754669 | 0.972580  |
| H | 4.512116 | -3.180340 | -1.268295 |
| H | 5.492761 | -0.322286 | -1.954270 |
| H | 3.461679 | -1.779988 | -3.796820 |
| H | 3.207629 | 1.231865  | -3.053864 |
| H | 0.727898 | -0.591858 | -3.146452 |
| H | 1.535152 | -3.333827 | -1.984182 |
| C | 4.130424 | 1.766866  | -0.197058 |
| C | 3.491686 | 3.003361  | -0.379860 |
| C | 5.394036 | 1.746796  | 0.415076  |
| C | 4.089794 | 4.183175  | 0.061282  |
| H | 2.532013 | 3.052832  | -0.878773 |
| C | 5.988822 | 2.928824  | 0.854460  |
| H | 5.924561 | 0.810302  | 0.536840  |
| C | 5.337288 | 4.150771  | 0.684642  |
| H | 3.578518 | 5.128700  | -0.091053 |
| H | 6.967139 | 2.890888  | 1.323619  |
| H | 5.802243 | 5.070619  | 1.025990  |

|    |           |           |           |
|----|-----------|-----------|-----------|
| C  | 2.037032  | 0.141183  | 1.602681  |
| H  | 2.750709  | 0.651917  | 2.251353  |
| N  | 0.821368  | -0.068640 | 1.930308  |
| C  | 0.220242  | 0.291150  | 3.207612  |
| H  | -0.230746 | 1.284533  | 3.091358  |
| H  | 0.963454  | 0.336065  | 4.009054  |
| C  | -0.957589 | -0.673088 | 3.596139  |
| O  | -1.294740 | -0.654586 | 4.770410  |
| O  | -1.485489 | -1.335332 | 2.622213  |
| Pd | -0.420767 | -1.218809 | 0.698622  |
| C  | 3.506426  | 0.486580  | -0.705178 |
| C  | 2.447341  | -0.372123 | 0.267479  |
| B  | 2.559122  | -2.065990 | 0.020551  |
| B  | 1.174076  | -1.142264 | -0.635048 |
| C  | -2.147078 | -0.287088 | -0.379887 |
| C  | -3.132970 | 0.049614  | 0.546996  |
| C  | -1.881677 | 0.467389  | -1.519986 |
| C  | -3.830090 | 1.241954  | 0.347796  |
| H  | -3.316334 | -0.571649 | 1.414555  |
| C  | -2.591162 | 1.655361  | -1.693958 |
| H  | -1.153053 | 0.148136  | -2.252647 |
| C  | -3.563370 | 2.050595  | -0.766308 |
| H  | -4.587676 | 1.540321  | 1.063657  |
| H  | -2.406871 | 2.283283  | -2.559474 |
| I  | -1.939428 | -2.798546 | -0.795466 |
| C  | -4.287965 | 3.327403  | -1.021913 |
| O  | -4.072294 | 4.060468  | -1.968040 |
| O  | -5.219705 | 3.588156  | -0.078954 |
| C  | -5.960171 | 4.804529  | -0.267378 |
| H  | -5.289115 | 5.667087  | -0.267525 |
| H  | -6.502862 | 4.780570  | -1.215608 |
| H  | -6.654423 | 4.858270  | 0.570873  |

## 6

Zero-point correction= 0.435293

Thermal correction to Energy= 0.467437

Thermal correction to Enthalpy= 0.468381

Thermal correction to Gibbs Free Energy= 0.370223

Sum of electronic and zero-point Energies= -1480.491240

Sum of electronic and thermal Energies= -1480.459097

Sum of electronic and thermal Enthalpies= -1480.458153

Sum of electronic and thermal Free Energies= -1480.556311

Cartesian coordinates

|    |           |           |           |
|----|-----------|-----------|-----------|
| B  | 2.022629  | -2.164162 | -1.789433 |
| B  | 2.932938  | 0.509728  | -2.378031 |
| B  | 1.510792  | -0.569607 | -2.418407 |
| B  | 1.685361  | 0.614557  | -1.125924 |
| B  | 3.143595  | -1.207118 | -2.787871 |
| B  | 3.754170  | -2.053606 | -1.335898 |
| B  | 4.310777  | -0.403891 | -1.712363 |
| B  | 3.915907  | -0.861740 | -0.045971 |
| H  | 1.045942  | 1.570049  | -0.881114 |
| H  | 4.652013  | -0.837410 | 0.874099  |
| H  | 2.340581  | -2.652876 | 0.840376  |
| H  | 4.495967  | -2.975511 | -1.374403 |
| H  | 5.417956  | -0.076358 | -1.963641 |
| H  | 3.455668  | -1.527849 | -3.884318 |
| H  | 3.117848  | 1.454056  | -3.064042 |
| H  | 0.677774  | -0.424019 | -3.247679 |
| H  | 1.539027  | -3.179081 | -2.151530 |
| C  | 3.976567  | 1.930536  | -0.174537 |
| C  | 3.313371  | 3.157214  | -0.334992 |
| C  | 5.227860  | 1.920050  | 0.462778  |
| C  | 3.875376  | 4.336207  | 0.153297  |
| H  | 2.363481  | 3.201031  | -0.852809 |
| C  | 5.786119  | 3.101342  | 0.949386  |
| H  | 5.777690  | 0.992754  | 0.568104  |
| C  | 5.110108  | 4.312844  | 0.801959  |
| H  | 3.345926  | 5.274224  | 0.018001  |
| H  | 6.755127  | 3.071138  | 1.437898  |
| H  | 5.546545  | 5.232126  | 1.180325  |
| C  | 1.916224  | 0.211694  | 1.546539  |
| H  | 2.624251  | 0.713081  | 2.208145  |
| N  | 0.712238  | -0.044166 | 1.883253  |
| C  | 0.138520  | 0.182194  | 3.192086  |
| H  | -0.549472 | 1.032709  | 3.114748  |
| H  | 0.900289  | 0.400664  | 3.945438  |
| C  | -0.744372 | -1.055790 | 3.624957  |
| O  | -0.873475 | -1.227987 | 4.825948  |
| O  | -1.280222 | -1.704905 | 2.648381  |
| Pd | -0.454319 | -1.288495 | 0.616756  |
| C  | 3.391945  | 0.651012  | -0.730182 |
| C  | 2.339066  | -0.253895 | 0.198296  |
| B  | 2.493544  | -1.941442 | -0.094315 |
| B  | 1.109181  | -1.033639 | -0.752879 |
| C  | -1.750955 | 0.143075  | -0.053099 |
| C  | -2.680815 | 0.501019  | 0.921106  |

|   |           |           |           |
|---|-----------|-----------|-----------|
| C | -1.729401 | 0.719467  | -1.317404 |
| C | -3.577096 | 1.533791  | 0.630738  |
| H | -2.725881 | -0.020890 | 1.868911  |
| C | -2.631344 | 1.751381  | -1.585101 |
| H | -1.054629 | 0.380582  | -2.090227 |
| C | -3.549243 | 2.170547  | -0.615614 |
| H | -4.304907 | 1.833108  | 1.376504  |
| H | -2.639949 | 2.232663  | -2.557593 |
| I | -1.735228 | -3.029574 | -0.872273 |
| C | -4.480829 | 3.279688  | -0.971337 |
| O | -4.476134 | 3.862603  | -2.038039 |
| O | -5.337639 | 3.572793  | 0.031008  |
| C | -6.270980 | 4.628646  | -0.248838 |
| H | -5.743038 | 5.560502  | -0.466123 |
| H | -6.896752 | 4.370054  | -1.106480 |
| H | -6.876787 | 4.731029  | 0.651185  |

7

Zero-point correction= 0.463947

Thermal correction to Energy= 0.501020

Thermal correction to Enthalpy= 0.501965

Thermal correction to Gibbs Free Energy= 0.392236

Sum of electronic and zero-point Energies= -1995.229418

Sum of electronic and thermal Energies= -1995.192345

Sum of electronic and thermal Enthalpies= -1995.191401

Sum of electronic and thermal Free Energies= -1995.301129

Cartesian coordinates

|   |           |           |           |
|---|-----------|-----------|-----------|
| B | 0.009326  | -1.773491 | -2.039361 |
| B | 2.247228  | -0.063816 | -2.712700 |
| B | 0.527764  | -0.061673 | -2.226955 |
| B | 1.793590  | 0.267045  | -1.037803 |
| B | 1.150468  | -1.321610 | -3.333670 |
| B | 1.429372  | -2.818070 | -2.395711 |
| B | 2.793208  | -1.754087 | -2.813363 |
| B | 2.679827  | -2.475548 | -1.200698 |
| H | 2.029798  | 1.243529  | -0.436195 |
| H | 3.477264  | -3.186922 | -0.701976 |
| H | 0.638406  | -3.272105 | 0.102990  |
| H | 1.337001  | -3.907110 | -2.850894 |
| H | 3.710176  | -2.037732 | -3.501957 |
| H | 0.852294  | -1.343086 | -4.479456 |
| H | 2.807398  | 0.785211  | -3.313144 |
| H | -0.192700 | 0.804788  | -2.572127 |



|    |           |           |           |
|----|-----------|-----------|-----------|
| H  | -1.101098 | -2.125199 | -2.241883 |
| C  | 4.521277  | -0.397669 | -1.044050 |
| C  | 4.805783  | 0.875629  | -0.526103 |
| C  | 5.579867  | -1.298011 | -1.245828 |
| C  | 6.116270  | 1.228214  | -0.203264 |
| H  | 4.016199  | 1.601958  | -0.379558 |
| C  | 6.887599  | -0.938700 | -0.925258 |
| H  | 5.386174  | -2.278683 | -1.664090 |
| C  | 7.160364  | 0.324360  | -0.398667 |
| H  | 6.316368  | 2.217547  | 0.196214  |
| H  | 7.692208  | -1.648275 | -1.091726 |
| H  | 8.179302  | 0.603994  | -0.148780 |
| C  | 2.346442  | -1.248495 | 1.235135  |
| H  | 3.169330  | -1.868786 | 1.600736  |
| N  | 1.465461  | -0.729999 | 1.993764  |
| C  | 1.222945  | -1.200297 | 3.336616  |
| H  | 0.998023  | -0.360058 | 4.000403  |
| H  | 2.039570  | -1.795217 | 3.759751  |
| C  | -0.051572 | -2.114780 | 3.225188  |
| O  | -0.284869 | -2.905716 | 4.113313  |
| O  | -0.790231 | -1.971257 | 2.139256  |
| Pd | -0.563709 | -0.189606 | 1.125783  |
| C  | 3.115703  | -0.804686 | -1.425332 |
| C  | 2.037458  | -1.230375 | -0.223934 |
| B  | 0.959948  | -2.492233 | -0.721890 |
| B  | 0.435008  | -0.803150 | -0.624481 |
| C  | -2.453018 | -0.249797 | 0.406475  |
| C  | -2.903361 | 0.661808  | -0.550706 |
| C  | -3.297946 | -1.219091 | 0.955084  |
| C  | -4.237433 | 0.598915  | -0.959962 |
| H  | -2.242558 | 1.406206  | -0.976913 |
| C  | -4.628218 | -1.262802 | 0.537299  |
| H  | -2.932314 | -1.929193 | 1.686570  |
| C  | -5.105413 | -0.356914 | -0.417525 |
| H  | -4.602503 | 1.299350  | -1.702578 |
| H  | -5.310162 | -2.000789 | 0.946771  |
| C  | -6.539025 | -0.455840 | -0.816410 |
| O  | -7.321788 | -1.272787 | -0.371610 |
| O  | -6.884207 | 0.472954  | -1.736889 |
| C  | -8.255343 | 0.433070  | -2.160222 |
| H  | -8.362177 | 1.238015  | -2.887261 |
| H  | -8.489150 | -0.531714 | -2.617413 |
| H  | -8.924956 | 0.590418  | -1.310900 |
| C  | 0.610181  | 3.967378  | 0.620946  |

|   |           |          |           |
|---|-----------|----------|-----------|
| C | -0.205232 | 2.762722 | 0.066744  |
| O | -0.193200 | 1.799471 | 0.934179  |
| O | -0.679371 | 2.824555 | -1.051777 |
| F | 0.407249  | 5.072048 | -0.101418 |
| F | 0.315385  | 4.237819 | 1.903404  |
| F | 1.934829  | 3.666056 | 0.558579  |

### 8-ts

Zero-point correction= 0.463291

Thermal correction to Energy= 0.499771

Thermal correction to Enthalpy= 0.500715

Thermal correction to Gibbs Free Energy= 0.393732

Sum of electronic and zero-point Energies= -1995.205134

Sum of electronic and thermal Energies= -1995.168654

Sum of electronic and thermal Enthalpies= -1995.167710

Sum of electronic and thermal Free Energies= -1995.274693

### Cartesian coordinates

|   |           |           |           |
|---|-----------|-----------|-----------|
| B | -0.730386 | -2.223509 | -1.447635 |
| B | 1.596865  | -1.056623 | -2.682617 |
| B | -0.069634 | -0.712410 | -2.154203 |
| B | 1.291169  | -0.201626 | -1.152696 |
| B | 0.344887  | -2.308992 | -2.856641 |
| B | 0.537877  | -3.471528 | -1.513705 |
| B | 1.961678  | -2.762926 | -2.309498 |
| B | 1.899540  | -2.938053 | -0.549995 |
| H | 1.705281  | 0.868679  | -0.928099 |
| H | 2.646131  | -3.569337 | 0.110133  |
| H | -0.085959 | -3.051262 | 1.034217  |
| H | 0.297029  | -4.628251 | -1.596199 |
| H | 2.794502  | -3.345395 | -2.911880 |
| H | -0.049785 | -2.627857 | -3.927035 |
| H | 2.181318  | -0.490016 | -3.538659 |
| H | -0.711480 | 0.084192  | -2.741737 |
| H | -1.876230 | -2.509652 | -1.498798 |
| C | 3.948350  | -1.146641 | -1.128669 |
| C | 4.395428  | 0.183798  | -1.097501 |
| C | 4.895347  | -2.180415 | -1.047002 |
| C | 5.755311  | 0.466826  | -0.968777 |
| H | 3.695360  | 1.005872  | -1.177040 |
| C | 6.253107  | -1.891195 | -0.923047 |
| H | 4.575066  | -3.214629 | -1.093541 |
| C | 6.688088  | -0.566176 | -0.878905 |
| H | 6.081020  | 1.502117  | -0.945534 |

|    |           |           |           |
|----|-----------|-----------|-----------|
| H  | 6.969206  | -2.705199 | -0.865239 |
| H  | 7.745837  | -0.340881 | -0.782090 |
| C  | 2.077921  | -1.095385 | 1.392256  |
| H  | 2.761557  | -1.845944 | 1.800158  |
| N  | 1.620045  | -0.149099 | 2.111984  |
| C  | 1.606322  | -0.267100 | 3.554517  |
| H  | 1.715401  | 0.714358  | 4.022763  |
| H  | 2.360225  | -0.954215 | 3.956083  |
| C  | 0.185338  | -0.847105 | 3.882701  |
| O  | -0.035557 | -1.307651 | 4.981040  |
| O  | -0.701270 | -0.827006 | 2.898161  |
| Pd | -0.365184 | 0.516603  | 1.398143  |
| C  | 2.485197  | -1.491308 | -1.294507 |
| C  | 1.488069  | -1.388263 | 0.044394  |
| B  | 0.237621  | -2.572921 | 0.002783  |
| B  | -0.222650 | -0.883501 | -0.387813 |
| C  | -2.010487 | -0.134204 | 0.301243  |
| C  | -2.616515 | 0.727621  | -0.638575 |
| C  | -2.796791 | -1.120027 | 0.943962  |
| C  | -3.962204 | 0.570724  | -0.961066 |
| H  | -2.025791 | 1.492123  | -1.129916 |
| C  | -4.135096 | -1.271004 | 0.612311  |
| H  | -2.354740 | -1.755002 | 1.701669  |
| C  | -4.724454 | -0.429845 | -0.344103 |
| H  | -4.423217 | 1.225064  | -1.691747 |
| H  | -4.746754 | -2.029976 | 1.087943  |
| C  | -6.171009 | -0.643806 | -0.658875 |
| O  | -6.859369 | -1.502431 | -0.144085 |
| O  | -6.629612 | 0.225139  | -1.582642 |
| C  | -8.014951 | 0.072201  | -1.934539 |
| H  | -8.215324 | 0.843062  | -2.678033 |
| H  | -8.196317 | -0.921736 | -2.350830 |
| H  | -8.650373 | 0.208474  | -1.056109 |
| C  | 1.225525  | 4.071581  | -0.531315 |
| C  | 0.176229  | 2.923474  | -0.562718 |
| O  | 0.197881  | 2.280605  | 0.558666  |
| O  | -0.457484 | 2.725983  | -1.584847 |
| F  | 1.030463  | 4.944774  | -1.523310 |
| F  | 1.219966  | 4.743285  | 0.631724  |
| F  | 2.463159  | 3.530409  | -0.688403 |

9

Zero-point correction= 0.466145

Thermal correction to Energy= 0.502939

Thermal correction to Enthalpy= 0.503883  
Thermal correction to Gibbs Free Energy= 0.393467  
Sum of electronic and zero-point Energies= -1995.292871  
Sum of electronic and thermal Energies= -1995.256078  
Sum of electronic and thermal Enthalpies= -1995.255134  
Sum of electronic and thermal Free Energies= -1995.365549

Cartesian coordinates

|   |           |           |           |
|---|-----------|-----------|-----------|
| B | 1.423798  | -3.634342 | -1.980785 |
| B | 3.022599  | -1.255887 | -2.312015 |
| B | 1.433574  | -1.974484 | -2.650177 |
| B | 1.618203  | -0.853992 | -1.299631 |
| B | 2.902447  | -2.984998 | -2.725597 |
| B | 3.010001  | -3.917253 | -1.206995 |
| B | 3.995986  | -2.455296 | -1.426058 |
| B | 3.174037  | -2.762040 | 0.110733  |
| H | 1.181205  | 0.227171  | -1.205414 |
| H | 3.702440  | -2.892994 | 1.157711  |
| H | 1.129789  | -4.153426 | 0.639885  |
| H | 3.511924  | -4.986436 | -1.117769 |
| H | 5.176662  | -2.406101 | -1.431212 |
| H | 3.336884  | -3.387426 | -3.751599 |
| H | 3.534454  | -0.387020 | -2.927862 |
| H | 0.818558  | -1.649241 | -3.608956 |
| H | 0.787548  | -4.512077 | -2.458144 |
| C | 3.931850  | -0.087148 | 0.086578  |
| C | 3.576442  | 1.259254  | -0.089199 |
| C | 5.039909  | -0.395833 | 0.893105  |
| C | 4.300067  | 2.267237  | 0.548588  |
| H | 2.738488  | 1.533579  | -0.716458 |
| C | 5.760971  | 0.615750  | 1.524508  |
| H | 5.351241  | -1.426003 | 1.018478  |
| C | 5.390398  | 1.951232  | 1.359210  |
| H | 4.007596  | 3.302427  | 0.402146  |
| H | 6.616324  | 0.357058  | 2.141163  |
| H | 5.952543  | 2.739080  | 1.851593  |
| C | 1.341474  | -1.371323 | 1.458422  |
| H | 1.681074  | -2.046235 | 2.247316  |
| N | 0.645707  | -0.359096 | 1.816277  |
| C | 0.307601  | -0.239453 | 3.246364  |
| H | 0.820698  | 0.642267  | 3.646738  |
| H | 0.611552  | -1.121199 | 3.817467  |
| C | -1.213021 | -0.006553 | 3.384991  |
| O | -1.803288 | -0.313084 | 4.397128  |

|    |           |           |           |
|----|-----------|-----------|-----------|
| O  | -1.762702 | 0.567731  | 2.334815  |
| Pd | -0.490054 | 1.120956  | 0.918918  |
| C  | 3.183714  | -1.189997 | -0.619238 |
| C  | 1.730845  | -1.819082 | 0.088306  |
| B  | 1.592878  | -3.490297 | -0.225122 |
| B  | 0.578096  | -2.314806 | -1.122455 |
| C  | -0.967228 | -2.130124 | -0.867650 |
| C  | -1.677875 | -1.089099 | -1.496866 |
| C  | -1.693324 | -3.001127 | -0.033713 |
| C  | -3.045401 | -0.912232 | -1.293532 |
| H  | -1.156617 | -0.414577 | -2.169932 |
| C  | -3.059407 | -2.833932 | 0.174689  |
| H  | -1.187421 | -3.829677 | 0.452900  |
| C  | -3.743722 | -1.784549 | -0.449784 |
| H  | -3.574293 | -0.103768 | -1.784785 |
| H  | -3.616754 | -3.506239 | 0.818238  |
| C  | -5.206885 | -1.650058 | -0.187641 |
| O  | -5.852114 | -2.414729 | 0.502082  |
| O  | -5.744076 | -0.576704 | -0.807701 |
| C  | -7.148477 | -0.379329 | -0.581399 |
| H  | -7.412536 | 0.518773  | -1.139453 |
| H  | -7.720614 | -1.238452 | -0.940807 |
| H  | -7.349057 | -0.242859 | 0.484028  |
| C  | -0.660744 | 4.201785  | -1.640997 |
| C  | -0.578325 | 2.997331  | -0.690098 |
| O  | 0.478619  | 2.302828  | -0.651880 |
| O  | -1.553342 | 2.728836  | 0.070855  |
| F  | -1.931107 | 4.527472  | -1.893354 |
| F  | -0.048162 | 5.256845  | -1.072579 |
| F  | -0.042419 | 3.923964  | -2.797308 |

## 10

Zero-point correction= 0.322215

Thermal correction to Energy= 0.341482

Thermal correction to Enthalpy= 0.342426

Thermal correction to Gibbs Free Energy= 0.273945

Sum of electronic and zero-point Energies= -884.146043

Sum of electronic and thermal Energies= -884.126777

Sum of electronic and thermal Enthalpies= -884.125833

Sum of electronic and thermal Free Energies= -884.194313

Cartesian coordinates

|   |           |           |          |
|---|-----------|-----------|----------|
| B | -1.362530 | -0.282798 | 1.439324 |
| B | -3.837888 | 0.015464  | 0.020506 |

|   |           |           |           |
|---|-----------|-----------|-----------|
| B | -1.373206 | -0.235022 | -1.424669 |
| B | -2.584891 | 0.897411  | 0.921227  |
| B | -2.591653 | 0.927276  | -0.858275 |
| B | -3.068194 | -0.727913 | 1.452125  |
| B | -3.078680 | -0.679800 | -1.440715 |
| B | -1.859311 | -1.893407 | 0.869618  |
| B | -3.389295 | -1.706776 | -0.009700 |
| B | -1.866184 | -1.864217 | -0.905271 |
| H | -0.633610 | -0.062455 | -2.326521 |
| H | -2.701588 | 1.952395  | -1.437656 |
| H | -3.642325 | -0.807586 | -2.475562 |
| H | -1.450983 | -2.778187 | -1.527228 |
| H | -1.441596 | -2.827741 | 1.458213  |
| H | -4.190154 | -2.580606 | -0.020860 |
| H | -3.624254 | -0.890328 | 2.486157  |
| H | -4.961951 | 0.392128  | 0.030990  |
| H | -2.689485 | 1.902807  | 1.535200  |
| H | -0.618854 | -0.141148 | 2.343081  |
| C | -0.730095 | -0.959144 | -0.006550 |
| C | -1.143999 | 0.692461  | 0.021883  |
| C | -0.066370 | 1.754546  | 0.032840  |
| C | 0.440414  | 2.252448  | 1.243813  |
| C | 0.399809  | 2.313074  | -1.168039 |
| C | 1.403481  | 3.260745  | 1.251291  |
| H | 0.077012  | 1.860459  | 2.185551  |
| C | 1.362262  | 3.321833  | -1.157303 |
| H | 0.004080  | 1.968254  | -2.115201 |
| C | 1.872390  | 3.796245  | 0.051465  |
| H | 1.781657  | 3.629553  | 2.199859  |
| H | 1.706574  | 3.739964  | -2.098421 |
| H | 2.621139  | 4.582745  | 0.058827  |
| C | 0.739026  | -1.272760 | -0.022380 |
| H | 1.401232  | -0.402984 | -0.071321 |
| N | 1.118324  | -2.479360 | 0.004810  |
| C | 2.526021  | -2.847554 | 0.007918  |
| H | 2.702250  | -3.477708 | 0.883968  |
| H | 2.695321  | -3.473745 | -0.877370 |
| C | 3.592282  | -1.754799 | 0.028783  |
| O | 4.423174  | -1.615092 | 0.895857  |
| O | 3.525025  | -0.950721 | -1.061366 |
| H | 4.239521  | -0.297438 | -0.964494 |

**11**

Zero-point correction= 0.447034

Thermal correction to Energy= 0.475856  
Thermal correction to Enthalpy= 0.476800  
Thermal correction to Gibbs Free Energy= 0.385490  
Sum of electronic and zero-point Energies= -1342.963980  
Sum of electronic and thermal Energies= -1342.935158  
Sum of electronic and thermal Enthalpies= -1342.934214  
Sum of electronic and thermal Free Energies= -1343.025524

Cartesian coordinates

|   |           |           |           |
|---|-----------|-----------|-----------|
| B | -0.092140 | -2.712381 | -1.996345 |
| B | -1.895980 | -3.024193 | 0.221973  |
| B | -0.194639 | -3.148666 | -0.263809 |
| B | -0.750942 | -1.728531 | 0.613097  |
| B | -1.490502 | -3.632190 | -1.392547 |
| B | -1.738593 | -2.302627 | -2.555047 |
| B | -2.851358 | -2.504373 | -1.183430 |
| B | -2.284217 | -0.891079 | -1.655247 |
| H | -0.506315 | -1.362776 | 1.709099  |
| H | -2.978331 | -0.013381 | -2.015795 |
| H | -0.178867 | -0.192186 | -2.890162 |
| H | -2.106694 | -2.463636 | -3.669790 |
| H | -4.011329 | -2.726446 | -1.239861 |
| H | -1.686617 | -4.767414 | -1.671655 |
| H | -2.402429 | -3.627688 | 1.102234  |
| H | 0.529426  | -3.925911 | 0.262811  |
| H | 0.724427  | -3.174861 | -2.720119 |
| C | -3.283153 | -0.684568 | 0.961217  |
| C | -3.457511 | -1.191024 | 2.259131  |
| C | -3.993538 | 0.466230  | 0.587403  |
| C | -4.330056 | -0.573000 | 3.152870  |
| H | -2.913133 | -2.073519 | 2.572669  |
| C | -4.858199 | 1.087006  | 1.489367  |
| H | -3.867738 | 0.895671  | -0.397692 |
| C | -5.035034 | 0.569415  | 2.771917  |
| H | -4.454055 | -0.985950 | 4.149405  |
| H | -5.393120 | 1.980164  | 1.181144  |
| H | -5.712529 | 1.052790  | 3.469495  |
| C | -0.856789 | 0.901442  | -0.108518 |
| H | -0.696892 | 1.035969  | 0.969531  |
| N | -0.904626 | 1.856517  | -0.937353 |
| C | -0.727275 | 3.203249  | -0.434394 |
| H | 0.175902  | 3.634224  | -0.876730 |
| H | -0.616058 | 3.256343  | 0.662445  |
| C | -1.870143 | 4.137295  | -0.814668 |

|   |           |           |           |
|---|-----------|-----------|-----------|
| O | -1.752701 | 5.336480  | -0.907350 |
| O | -3.044357 | 3.491263  | -0.985635 |
| C | -2.338721 | -1.384741 | 0.008619  |
| C | -0.996699 | -0.521533 | -0.573668 |
| B | -0.584756 | -1.015263 | -2.148320 |
| B | 0.402400  | -1.535721 | -0.746353 |
| C | 1.839926  | -0.953595 | -0.436569 |
| C | 2.595564  | -1.461946 | 0.636811  |
| C | 2.422333  | 0.064734  | -1.215466 |
| C | 3.870031  | -0.980853 | 0.926042  |
| H | 2.181569  | -2.255017 | 1.252407  |
| C | 3.693708  | 0.555693  | -0.933414 |
| H | 1.875223  | 0.475650  | -2.058108 |
| C | 4.427451  | 0.036774  | 0.140939  |
| H | 4.436416  | -1.388776 | 1.755486  |
| H | 4.139950  | 1.339717  | -1.536244 |
| C | 5.783719  | 0.597869  | 0.399008  |
| O | 6.295638  | 1.490499  | -0.248895 |
| O | 6.398872  | 0.002687  | 1.447598  |
| C | 7.713434  | 0.496423  | 1.744528  |
| H | 8.059674  | -0.083844 | 2.599841  |
| H | 8.380006  | 0.355799  | 0.889870  |
| H | 7.679420  | 1.560813  | 1.990806  |
| H | -3.695781 | 4.177115  | -1.212158 |

## 12-ts

Zero-point correction= 0.434527

Thermal correction to Energy= 0.478428

Thermal correction to Enthalpy= 0.479547

Thermal correction to Gibbs Free Energy= 0.350171

Sum of electronic and zero-point Energies= -1480.480267

Sum of electronic and thermal Energies= -1480.436367

Sum of electronic and thermal Enthalpies= -1480.435248

Sum of electronic and thermal Free Energies= -1480.564623

## Cartesian coordinates

|   |           |           |           |
|---|-----------|-----------|-----------|
| B | -0.374260 | -2.646930 | 0.036118  |
| B | -2.878393 | -2.289999 | 1.417640  |
| B | -1.129526 | -1.945331 | 1.497923  |
| B | -2.247241 | -0.691955 | 0.979384  |
| B | -1.715560 | -3.503079 | 0.835775  |
| B | -1.662764 | -3.408178 | -0.948618 |
| B | -3.203589 | -3.191808 | -0.083660 |
| B | -2.782950 | -2.148788 | -1.455814 |



|    |           |           |           |
|----|-----------|-----------|-----------|
| H  | -2.543161 | 0.321622  | 1.498384  |
| H  | -3.398353 | -2.036653 | -2.455087 |
| H  | -0.509898 | -1.496498 | -2.389724 |
| H  | -1.475959 | -4.344655 | -1.649484 |
| H  | -4.159690 | -3.881688 | -0.168336 |
| H  | -1.568267 | -4.525194 | 1.416941  |
| H  | -3.622406 | -2.368288 | 2.332766  |
| H  | -0.586021 | -1.853485 | 2.546265  |
| H  | 0.729748  | -3.072767 | 0.021910  |
| C  | -4.856008 | -0.914574 | -0.056721 |
| C  | -5.283077 | 0.045136  | 0.874094  |
| C  | -5.765715 | -1.359348 | -1.029732 |
| C  | -6.576333 | 0.563776  | 0.815426  |
| H  | -4.613406 | 0.383264  | 1.654715  |
| C  | -7.058246 | -0.839709 | -1.083688 |
| H  | -5.471472 | -2.121744 | -1.740924 |
| C  | -7.467066 | 0.128041  | -0.165627 |
| H  | -6.885810 | 1.306101  | 1.544676  |
| H  | -7.745850 | -1.198373 | -1.843446 |
| H  | -8.473724 | 0.532523  | -0.208979 |
| C  | -2.387927 | 0.601203  | -1.395869 |
| H  | -3.305301 | 0.820936  | -1.945214 |
| N  | -1.422038 | 1.423265  | -1.276609 |
| C  | -1.385899 | 2.758187  | -1.863548 |
| H  | -1.864180 | 3.445454  | -1.154548 |
| H  | -1.933641 | 2.800847  | -2.809784 |
| C  | 0.077536  | 3.276321  | -2.051042 |
| O  | 0.224433  | 4.220236  | -2.812879 |
| O  | 0.978853  | 2.683768  | -1.338791 |
| Pd | 0.365459  | 0.865582  | -0.278339 |
| C  | -3.465140 | -1.505734 | 0.009447  |
| C  | -2.192336 | -0.718651 | -0.736564 |
| B  | -1.031831 | -1.802568 | -1.372859 |
| B  | -0.691619 | -0.889953 | 0.129558  |
| C  | 2.325835  | 0.390905  | 0.362793  |
| C  | 2.628606  | -0.925404 | 0.740550  |
| C  | 3.263409  | 1.200908  | -0.300138 |
| C  | 3.843099  | -1.479099 | 0.340972  |
| H  | 1.935621  | -1.508661 | 1.330856  |
| C  | 4.472746  | 0.631369  | -0.684288 |
| H  | 3.017573  | 2.223697  | -0.559692 |
| C  | 4.769137  | -0.704193 | -0.369840 |
| H  | 4.080153  | -2.504803 | 0.598505  |
| H  | 5.205515  | 1.214009  | -1.232491 |

|   |          |           |           |
|---|----------|-----------|-----------|
| I | 1.035998 | 1.501457  | 2.296969  |
| C | 6.094012 | -1.242522 | -0.798216 |
| O | 6.931140 | -0.599940 | -1.400221 |
| O | 6.263626 | -2.534382 | -0.440644 |
| C | 7.521061 | -3.115306 | -0.822689 |
| H | 7.641974 | -3.087910 | -1.908363 |
| H | 8.350179 | -2.572581 | -0.362043 |
| H | 7.489689 | -4.144323 | -0.465293 |

### 13

Zero-point correction= 0.435953

Thermal correction to Energy= 0.480300

Thermal correction to Enthalpy= 0.481418

Thermal correction to Gibbs Free Energy= 0.351781

Sum of electronic and zero-point Energies= -1480.495254

Sum of electronic and thermal Energies= -1480.450907

Sum of electronic and thermal Enthalpies= -1480.449788

Sum of electronic and thermal Free Energies= -1480.579426

#### Cartesian coordinates

|   |           |           |           |
|---|-----------|-----------|-----------|
| B | 0.155162  | 2.342690  | -0.831283 |
| B | 2.525708  | 2.637246  | 0.799531  |
| B | 0.801296  | 2.172794  | 0.836038  |
| B | 2.055634  | 0.931958  | 0.821659  |
| B | 1.356102  | 3.507238  | -0.218519 |
| B | 1.501652  | 2.885724  | -1.888684 |
| B | 2.949123  | 3.069883  | -0.873149 |
| B | 2.740652  | 1.632088  | -1.889842 |
| H | 2.352738  | 0.152464  | 1.644202  |
| H | 3.469406  | 1.280585  | -2.747448 |
| H | 0.615252  | 0.538775  | -2.772742 |
| H | 1.338933  | 3.551872  | -2.853898 |
| H | 3.861818  | 3.789397  | -1.085462 |
| H | 1.085645  | 4.637275  | 0.011448  |
| H | 3.160837  | 3.047822  | 1.707312  |
| H | 0.153388  | 2.346650  | 1.809599  |
| H | -0.970550 | 2.628908  | -1.049315 |
| C | 4.727326  | 1.053457  | -0.035713 |
| C | 5.103255  | 0.329147  | 1.105901  |
| C | 5.714671  | 1.388412  | -0.976464 |
| C | 6.428194  | -0.066486 | 1.288640  |
| H | 4.370559  | 0.078830  | 1.862342  |
| C | 7.038078  | 0.994069  | -0.787923 |
| H | 5.454356  | 1.968341  | -1.853775 |

|    |           |           |           |
|----|-----------|-----------|-----------|
| C  | 7.399404  | 0.260443  | 0.342628  |
| H  | 6.697724  | -0.626899 | 2.178500  |
| H  | 7.785932  | 1.265568  | -1.526564 |
| H  | 8.430375  | -0.047226 | 0.488486  |
| C  | 2.456276  | -1.001231 | -1.104319 |
| H  | 3.287968  | -1.263625 | -1.762959 |
| N  | 1.578191  | -1.837927 | -0.714298 |
| C  | 1.404656  | -3.122619 | -1.350832 |
| H  | 1.210928  | -3.891580 | -0.597229 |
| H  | 2.252929  | -3.424128 | -1.974750 |
| C  | 0.128200  | -2.986393 | -2.261694 |
| O  | -0.056738 | -3.830305 | -3.116390 |
| O  | -0.644598 | -1.957413 | -2.020565 |
| Pd | -0.454410 | -1.070565 | -0.090097 |
| C  | 3.303340  | 1.517211  | -0.248082 |
| C  | 2.163171  | 0.430750  | -0.817793 |
| B  | 1.014187  | 1.184986  | -1.869789 |
| B  | 0.601701  | 0.745979  | -0.199845 |
| C  | -2.339035 | -0.336218 | -0.116431 |
| C  | -2.774426 | 0.759056  | 0.636295  |
| C  | -3.203856 | -0.999646 | -0.992163 |
| C  | -4.087196 | 1.207314  | 0.491901  |
| H  | -2.113081 | 1.266203  | 1.326551  |
| C  | -4.519068 | -0.549915 | -1.116029 |
| H  | -2.854997 | -1.830199 | -1.594314 |
| C  | -4.967511 | 0.552867  | -0.379906 |
| H  | -4.431199 | 2.061709  | 1.063705  |
| H  | -5.208857 | -1.043845 | -1.792404 |
| I  | -0.456507 | -1.120169 | 2.567250  |
| C  | -6.381569 | 0.986520  | -0.563310 |
| O  | -7.177927 | 0.444500  | -1.304811 |
| O  | -6.693245 | 2.064931  | 0.192778  |
| C  | -8.043749 | 2.532648  | 0.060768  |
| H  | -8.250426 | 2.826980  | -0.971356 |
| H  | -8.751867 | 1.752468  | 0.351325  |
| H  | -8.124423 | 3.391157  | 0.727541  |

#### 14-ts

Zero-point correction= 0.461253

Thermal correction to Energy= 0.497760

Thermal correction to Enthalpy= 0.498704

Thermal correction to Gibbs Free Energy= 0.389145

Sum of electronic and zero-point Energies= -1995.275305

Sum of electronic and thermal Energies= -1995.238798

Sum of electronic and thermal Enthalpies= -1995.237854

Sum of electronic and thermal Free Energies= -1995.347413

Cartesian coordinates

|    |           |           |           |
|----|-----------|-----------|-----------|
| B  | -1.957053 | 2.101362  | -1.673269 |
| B  | -1.625825 | -0.432346 | -3.026637 |
| B  | -0.759150 | 1.024332  | -2.440925 |
| B  | -0.653149 | -0.499629 | -1.529820 |
| B  | -2.396217 | 1.174141  | -3.131898 |
| B  | -3.551959 | 1.321021  | -1.786415 |
| B  | -3.346331 | -0.235952 | -2.622186 |
| H  | -2.972919 | 1.695666  | 0.759247  |
| H  | -4.602746 | 1.861383  | -1.771406 |
| H  | -4.257449 | -0.744329 | -3.176829 |
| H  | -2.607765 | 1.701206  | -4.171205 |
| H  | -1.290451 | -1.061698 | -3.971950 |
| H  | 0.202541  | 1.445982  | -2.989874 |
| H  | -1.867024 | 3.279045  | -1.658946 |
| H  | -0.148435 | 2.270530  | -0.041403 |
| C  | -1.704392 | -0.896761 | 1.055322  |
| H  | -2.350867 | -1.711517 | 1.382910  |
| N  | -0.768532 | -0.427918 | 1.784507  |
| C  | -0.419027 | -0.931674 | 3.112250  |
| H  | -0.664170 | -1.992005 | 3.219544  |
| H  | -0.993255 | -0.360745 | 3.851833  |
| C  | 1.083651  | -0.673066 | 3.414494  |
| O  | 1.596034  | -1.261612 | 4.346135  |
| O  | 1.660418  | 0.217974  | 2.652293  |
| Pd | 0.552883  | 0.931794  | 1.089590  |
| O  | 0.383766  | 3.530926  | -0.214733 |
| C  | 1.595675  | 3.321433  | 0.051766  |
| O  | 2.066662  | 2.264744  | 0.551186  |
| C  | 2.603482  | 4.427819  | -0.325136 |
| C  | -1.876026 | -0.279924 | -0.282205 |
| B  | -2.622985 | 1.266837  | -0.279806 |
| B  | -0.881901 | 1.071828  | -0.657294 |
| B  | -2.293147 | -1.251529 | -1.620406 |
| H  | -2.459224 | -2.400703 | -1.420543 |
| C  | -3.429328 | -0.147538 | -0.915704 |
| C  | -4.599994 | -0.728342 | -0.153857 |
| C  | -5.095524 | -2.000499 | -0.483205 |
| C  | -5.249369 | 0.006958  | 0.850371  |
| C  | -6.194986 | -2.530614 | 0.190372  |
| H  | -4.633939 | -2.574979 | -1.277123 |

|   |           |           |           |
|---|-----------|-----------|-----------|
| C | -6.347988 | -0.527686 | 1.522678  |
| H | -4.910830 | 1.004261  | 1.101850  |
| C | -6.821928 | -1.799363 | 1.199756  |
| H | -6.563101 | -3.515041 | -0.081566 |
| H | -6.836145 | 0.058139  | 2.295377  |
| H | -7.678342 | -2.212996 | 1.723388  |
| F | 2.073984  | 5.640561  | -0.121980 |
| F | 3.730828  | 4.326776  | 0.383617  |
| F | 2.903826  | 4.304823  | -1.631907 |
| C | 0.611802  | -1.415226 | -1.294516 |
| C | 1.900592  | -0.856996 | -1.399804 |
| C | 0.522876  | -2.790485 | -1.007171 |
| C | 3.046949  | -1.627782 | -1.217239 |
| H | 2.013679  | 0.198236  | -1.627180 |
| C | 1.661377  | -3.568220 | -0.819756 |
| H | -0.448545 | -3.270854 | -0.935639 |
| C | 2.932933  | -2.991405 | -0.921926 |
| H | 4.028115  | -1.174394 | -1.295915 |
| H | 1.589064  | -4.627338 | -0.596132 |
| C | 4.117881  | -3.873152 | -0.708527 |
| O | 4.049921  | -5.061202 | -0.458994 |
| O | 5.284617  | -3.204588 | -0.825431 |
| C | 6.467006  | -3.991887 | -0.613241 |
| H | 7.303588  | -3.305691 | -0.742839 |
| H | 6.469710  | -4.415073 | 0.394226  |
| H | 6.521129  | -4.807408 | -1.338797 |

## 15

Zero-point correction= 0.466758

Thermal correction to Energy= 0.504067

Thermal correction to Enthalpy= 0.505011

Thermal correction to Gibbs Free Energy= 0.392153

Sum of electronic and zero-point Energies= -1995.288249

Sum of electronic and thermal Energies= -1995.250940

Sum of electronic and thermal Enthalpies= -1995.249996

Sum of electronic and thermal Free Energies= -1995.362854

### Cartesian coordinates

|   |           |           |           |
|---|-----------|-----------|-----------|
| B | -1.614469 | 1.585478  | -2.208835 |
| B | -1.838897 | -1.213754 | -2.914079 |
| B | -0.687563 | 0.154424  | -2.732688 |
| B | -0.791477 | -1.100681 | -1.475852 |
| B | -2.322360 | 0.441934  | -3.385718 |
| B | -3.331041 | 1.111852  | -2.084283 |

|    |           |           |           |
|----|-----------|-----------|-----------|
| B  | -3.462455 | -0.607974 | -2.516300 |
| H  | -2.522474 | 1.954197  | 0.267135  |
| H  | -4.269583 | 1.825750  | -2.171844 |
| H  | -4.484404 | -1.048699 | -2.914952 |
| H  | -2.523062 | 0.735428  | -4.516648 |
| H  | -1.691585 | -2.096315 | -3.690945 |
| H  | 0.286881  | 0.238597  | -3.403797 |
| H  | -1.322345 | 2.701148  | -2.487322 |
| H  | 1.639750  | 5.192702  | 0.771121  |
| C  | -1.584989 | -0.643930 | 1.147564  |
| H  | -2.229161 | -1.287352 | 1.747105  |
| N  | -0.523487 | -0.100052 | 1.613056  |
| C  | -0.031897 | -0.264496 | 2.984824  |
| H  | 0.554231  | -1.190910 | 3.016730  |
| H  | -0.862496 | -0.352933 | 3.691320  |
| C  | 0.942560  | 0.889198  | 3.408795  |
| O  | 1.090249  | 1.052514  | 4.612044  |
| O  | 1.534126  | 1.504808  | 2.439739  |
| Pd | 0.609769  | 1.148119  | 0.516911  |
| O  | 1.283672  | 4.306882  | 0.584838  |
| C  | 2.082000  | 3.641742  | -0.221021 |
| O  | 1.906882  | 2.481744  | -0.546882 |
| C  | 3.285847  | 4.413190  | -0.810723 |
| C  | -1.852942 | -0.379185 | -0.291074 |
| B  | -2.314907 | 1.233443  | -0.640065 |
| B  | -0.668828 | 0.644645  | -1.018039 |
| B  | -2.533668 | -1.543428 | -1.328241 |
| H  | -2.897298 | -2.560097 | -0.853315 |
| C  | -3.405897 | -0.112038 | -0.883017 |
| C  | -4.593557 | -0.287739 | 0.036722  |
| C  | -5.406090 | -1.426632 | -0.084318 |
| C  | -4.932717 | 0.680160  | 0.994566  |
| C  | -6.518007 | -1.597839 | 0.738466  |
| H  | -5.175548 | -2.177829 | -0.830137 |
| C  | -6.044044 | 0.503466  | 1.818917  |
| H  | -4.338272 | 1.579172  | 1.096047  |
| C  | -6.839441 | -0.635656 | 1.696569  |
| H  | -7.133658 | -2.485014 | 0.625738  |
| H  | -6.287689 | 1.264383  | 2.554070  |
| H  | -7.705230 | -0.769950 | 2.337934  |
| F  | 3.395171  | 5.617935  | -0.195796 |
| F  | 4.412511  | 3.734033  | -0.627448 |
| F  | 3.095542  | 4.621844  | -2.115269 |
| C  | 0.320303  | -2.145877 | -1.057088 |

|   |           |           |           |
|---|-----------|-----------|-----------|
| C | 1.678610  | -1.776798 | -1.104969 |
| C | 0.022514  | -3.463575 | -0.662529 |
| C | 2.691675  | -2.669301 | -0.762293 |
| H | 1.945964  | -0.771651 | -1.416061 |
| C | 1.025842  | -4.362667 | -0.312145 |
| H | -1.009112 | -3.801177 | -0.634878 |
| C | 2.369358  | -3.970800 | -0.356160 |
| H | 3.730329  | -2.361968 | -0.804209 |
| H | 0.790581  | -5.376396 | -0.005275 |
| C | 3.402170  | -4.972266 | 0.034034  |
| O | 3.157872  | -6.109082 | 0.390614  |
| O | 4.658558  | -4.478675 | -0.048364 |
| C | 5.700341  | -5.393765 | 0.322711  |
| H | 6.632432  | -4.840609 | 0.207899  |
| H | 5.573590  | -5.722363 | 1.357316  |
| H | 5.691779  | -6.271894 | -0.328074 |

## 16

Zero-point correction= 0.560313

Thermal correction to Energy= 0.602057

Thermal correction to Enthalpy= 0.603001

Thermal correction to Gibbs Free Energy= 0.481001

Sum of electronic and zero-point Energies= -1939.316459

Sum of electronic and thermal Energies= -1939.274716

Sum of electronic and thermal Enthalpies= -1939.273771

Sum of electronic and thermal Free Energies= -1939.395772

### Cartesian coordinates

|   |           |           |           |
|---|-----------|-----------|-----------|
| B | -0.110797 | 0.461144  | -2.585765 |
| B | 0.649028  | 3.243154  | -2.783687 |
| B | -0.717133 | 2.116718  | -2.939642 |
| B | -0.536088 | 3.080581  | -1.475240 |
| B | 0.916090  | 1.624695  | -3.468412 |
| B | 1.623899  | 0.594639  | -2.192941 |
| B | 2.091340  | 2.309481  | -2.321982 |
| B | 1.779215  | 1.567385  | -0.741533 |
| H | -1.204213 | 3.958632  | -1.059423 |
| H | 2.565901  | 1.495901  | 0.131466  |
| H | 2.424225  | -0.246524 | -2.424873 |
| H | 3.175667  | 2.726284  | -2.541326 |
| H | 1.193802  | 1.497604  | -4.613660 |
| H | 0.756466  | 4.287581  | -3.327299 |
| H | -1.608442 | 2.339068  | -3.688131 |
| H | -0.578251 | -0.493881 | -3.110831 |

|    |           |           |           |
|----|-----------|-----------|-----------|
| C  | 1.689414  | 4.364582  | -0.423015 |
| C  | 1.050847  | 5.607061  | -0.566405 |
| C  | 2.844504  | 4.290594  | 0.370823  |
| C  | 1.541956  | 6.737828  | 0.084308  |
| H  | 0.174885  | 5.696476  | -1.197601 |
| C  | 3.331398  | 5.423676  | 1.022172  |
| H  | 3.375142  | 3.352739  | 0.475123  |
| C  | 2.680484  | 6.649802  | 0.886015  |
| H  | 1.033592  | 7.688877  | -0.041586 |
| H  | 4.225818  | 5.343734  | 1.632344  |
| H  | 3.061840  | 7.530801  | 1.393308  |
| C  | -0.087773 | 2.150209  | 1.111399  |
| H  | -0.273847 | 3.112767  | 1.589654  |
| N  | -0.136042 | 1.039812  | 1.741950  |
| C  | -0.450343 | 0.901827  | 3.166516  |
| H  | -1.542236 | 0.906479  | 3.269193  |
| H  | -0.046072 | 1.740438  | 3.741195  |
| C  | 0.044674  | -0.459246 | 3.760262  |
| O  | 0.139362  | -0.514978 | 4.976869  |
| O  | 0.245792  | -1.408967 | 2.903229  |
| Pd | 0.338114  | -0.739685 | 0.845206  |
| C  | 1.162654  | 3.152981  | -1.157814 |
| C  | 0.186063  | 2.040666  | -0.344348 |
| B  | 0.421875  | 0.408464  | -0.883599 |
| B  | -1.052086 | 1.351380  | -1.364649 |
| C  | -2.510713 | 1.057837  | -0.818987 |
| C  | -2.869718 | -0.215219 | -0.336805 |
| C  | -3.518451 | 2.042015  | -0.843779 |
| C  | -4.156212 | -0.489280 | 0.123094  |
| H  | -2.132986 | -1.011583 | -0.324392 |
| C  | -4.806921 | 1.780408  | -0.387422 |
| H  | -3.298670 | 3.030106  | -1.235411 |
| C  | -5.135377 | 0.511930  | 0.105832  |
| H  | -4.403539 | -1.475473 | 0.498981  |
| H  | -5.576127 | 2.545261  | -0.407915 |
| C  | -6.528029 | 0.286550  | 0.587779  |
| O  | -7.397492 | 1.136307  | 0.598861  |
| O  | -6.727700 | -0.980118 | 1.018767  |
| C  | -8.049854 | -1.258209 | 1.505597  |
| H  | -8.036995 | -2.304322 | 1.811249  |
| H  | -8.290892 | -0.613399 | 2.354362  |
| H  | -8.791587 | -1.095838 | 0.719508  |
| C  | 1.582833  | -2.784617 | 0.590437  |
| C  | 0.304389  | -3.046144 | 0.050963  |



|   |           |           |           |
|---|-----------|-----------|-----------|
| C | 0.153452  | -3.245524 | -1.343334 |
| C | 1.270539  | -3.191109 | -2.168798 |
| C | 2.544527  | -2.928968 | -1.643526 |
| C | 2.692668  | -2.719955 | -0.281015 |
| H | 1.715264  | -2.772834 | 1.667299  |
| H | -0.526103 | -3.247546 | 0.719454  |
| H | 1.138160  | -3.357505 | -3.232514 |
| H | 3.402243  | -2.892838 | -2.305401 |
| I | 4.626850  | -2.354153 | 0.536143  |
| C | -1.162426 | -3.562531 | -1.971777 |
| O | -1.318361 | -3.760693 | -3.159585 |
| O | -2.164114 | -3.610209 | -1.067527 |
| C | -3.463075 | -3.918214 | -1.607490 |
| H | -3.431868 | -4.858941 | -2.161239 |
| H | -4.126239 | -3.998117 | -0.746887 |
| H | -3.794628 | -3.119682 | -2.275086 |

### 17-ts

Zero-point correction= 0.559080

Thermal correction to Energy= 0.600525

Thermal correction to Enthalpy= 0.601469

Thermal correction to Gibbs Free Energy= 0.480482

Sum of electronic and zero-point Energies= -1939.295186

Sum of electronic and thermal Energies= -1939.253742

Sum of electronic and thermal Enthalpies= -1939.252798

Sum of electronic and thermal Free Energies= -1939.373784

### Cartesian coordinates

|   |           |           |           |
|---|-----------|-----------|-----------|
| B | 0.885258  | -0.235790 | -2.663775 |
| B | 3.601760  | 0.665265  | -3.005462 |
| B | 1.898658  | 1.153889  | -3.163072 |
| B | 2.831468  | 1.669592  | -1.765254 |
| B | 2.396322  | -0.514700 | -3.562764 |
| B | 1.968952  | -1.571813 | -2.183094 |
| B | 3.647010  | -1.007963 | -2.400470 |
| B | 2.900479  | -1.037953 | -0.793301 |
| H | 3.182314  | 2.751294  | -1.457115 |
| H | 3.305577  | -1.644206 | 0.130151  |
| H | 1.701124  | -2.718583 | -2.309547 |
| H | 4.597897  | -1.684101 | -2.588321 |
| H | 2.412927  | -0.914932 | -4.677886 |
| H | 4.518120  | 1.111335  | -3.604293 |
| H | 1.560288  | 1.947995  | -3.974194 |
| H | -0.177915 | -0.420369 | -3.151675 |

|    |           |           |           |
|----|-----------|-----------|-----------|
| C  | 5.168550  | 0.606251  | -0.665030 |
| C  | 5.776807  | 1.867730  | -0.764589 |
| C  | 5.841279  | -0.411210 | 0.029801  |
| C  | 7.010090  | 2.110910  | -0.161006 |
| H  | 5.297751  | 2.660305  | -1.326020 |
| C  | 7.074863  | -0.164360 | 0.631090  |
| H  | 5.411135  | -1.402965 | 0.092799  |
| C  | 7.661230  | 1.098404  | 0.543929  |
| H  | 7.462925  | 3.093577  | -0.250527 |
| H  | 7.577793  | -0.965718 | 1.163525  |
| H  | 8.621822  | 1.289056  | 1.012722  |
| C  | 2.420954  | 0.998440  | 0.913085  |
| H  | 3.165105  | 1.703693  | 1.287794  |
| N  | 1.512264  | 0.479085  | 1.639653  |
| C  | 1.321488  | 0.753612  | 3.061118  |
| H  | 1.548475  | 1.796039  | 3.303605  |
| H  | 2.011873  | 0.110273  | 3.620724  |
| C  | -0.116795 | 0.385277  | 3.549408  |
| O  | -0.444557 | 0.825118  | 4.641364  |
| O  | -0.801654 | -0.387759 | 2.770875  |
| Pd | 0.059464  | -0.818551 | 0.806725  |
| C  | 3.846901  | 0.329953  | -1.346907 |
| C  | 2.410362  | 0.586414  | -0.517568 |
| B  | 1.188966  | -0.568018 | -0.935764 |
| B  | 1.124020  | 1.133768  | -1.551932 |
| C  | 0.042269  | 2.155128  | -1.014788 |
| C  | -1.324635 | 1.826005  | -1.093716 |
| C  | 0.376250  | 3.407377  | -0.464550 |
| C  | -2.312488 | 2.699408  | -0.640519 |
| H  | -1.624894 | 0.875331  | -1.521737 |
| C  | -0.601401 | 4.284941  | -0.007993 |
| H  | 1.416579  | 3.712542  | -0.398510 |
| C  | -1.955344 | 3.935469  | -0.090167 |
| H  | -3.358417 | 2.423839  | -0.708532 |
| H  | -0.339558 | 5.249571  | 0.413801  |
| C  | -2.959799 | 4.914232  | 0.417884  |
| O  | -2.681501 | 6.004716  | 0.877667  |
| O  | -4.226639 | 4.456611  | 0.311583  |
| C  | -5.241122 | 5.348569  | 0.799009  |
| H  | -6.187313 | 4.830525  | 0.643543  |
| H  | -5.088444 | 5.559689  | 1.860268  |
| H  | -5.222964 | 6.291158  | 0.246117  |
| C  | -2.704261 | -1.708760 | 0.986785  |
| C  | -3.976551 | -1.582977 | 0.435737  |

|   |           |           |           |
|---|-----------|-----------|-----------|
| C | -4.170421 | -1.717794 | -0.948285 |
| C | -3.078868 | -1.985379 | -1.786214 |
| C | -1.799481 | -2.118439 | -1.253830 |
| C | -1.615834 | -1.919945 | 0.123821  |
| H | -2.539489 | -1.584472 | 2.050674  |
| H | -4.823811 | -1.380822 | 1.080875  |
| H | -3.251910 | -2.104770 | -2.850526 |
| H | -0.965236 | -2.367288 | -1.895780 |
| I | 0.171315  | -3.552787 | 0.955491  |
| C | -5.517533 | -1.607284 | -1.581951 |
| O | -5.722587 | -1.722171 | -2.774608 |
| O | -6.491816 | -1.362440 | -0.680197 |
| C | -7.816285 | -1.245357 | -1.225110 |
| H | -8.107321 | -2.170986 | -1.727696 |
| H | -8.467372 | -1.049285 | -0.373633 |
| H | -7.863728 | -0.423941 | -1.944298 |

## 18

Zero-point correction= 0.559990

Thermal correction to Energy= 0.601861

Thermal correction to Enthalpy= 0.602805

Thermal correction to Gibbs Free Energy= 0.481412

Sum of electronic and zero-point Energies= -1939.306327

Sum of electronic and thermal Energies= -1939.264456

Sum of electronic and thermal Enthalpies= -1939.263512

Sum of electronic and thermal Free Energies= -1939.384905

### Cartesian coordinates

|   |           |           |           |
|---|-----------|-----------|-----------|
| B | 0.639292  | -0.407083 | -2.489274 |
| B | 3.371164  | 0.328317  | -3.047062 |
| B | 1.693059  | 0.901552  | -3.120462 |
| B | 2.742068  | 1.426454  | -1.805045 |
| B | 2.073796  | -0.806851 | -3.468575 |
| B | 1.693029  | -1.776724 | -2.016788 |
| B | 3.379375  | -1.315968 | -2.375328 |
| B | 2.758211  | -1.231445 | -0.724428 |
| H | 3.173853  | 2.496920  | -1.568821 |
| H | 3.183925  | -1.814600 | 0.198397  |
| H | 1.352750  | -2.907009 | -2.070295 |
| H | 4.278684  | -2.052147 | -2.587354 |
| H | 1.989717  | -1.258394 | -4.560275 |
| H | 4.260345  | 0.700840  | -3.729996 |
| H | 1.342629  | 1.676938  | -3.943564 |
| H | -0.461992 | -0.571670 | -2.887413 |

|    |           |           |           |
|----|-----------|-----------|-----------|
| C  | 5.088446  | 0.325264  | -0.819183 |
| C  | 5.799898  | 1.469760  | -1.214534 |
| C  | 5.697273  | -0.571485 | 0.072180  |
| C  | 7.077357  | 1.718925  | -0.715992 |
| H  | 5.362645  | 2.163809  | -1.922348 |
| C  | 6.974544  | -0.316496 | 0.570992  |
| H  | 5.185652  | -1.476976 | 0.372382  |
| C  | 7.667677  | 0.829954  | 0.183059  |
| H  | 7.610767  | 2.608567  | -1.036322 |
| H  | 7.427295  | -1.022885 | 1.259882  |
| H  | 8.662591  | 1.025245  | 0.571445  |
| C  | 2.437487  | 0.924228  | 0.920863  |
| H  | 3.054289  | 1.793811  | 1.157819  |
| N  | 1.648327  | 0.372389  | 1.755163  |
| C  | 1.270767  | 0.991005  | 3.003723  |
| H  | 1.868667  | 1.873417  | 3.255221  |
| H  | 1.342574  | 0.258041  | 3.813353  |
| C  | -0.238124 | 1.410014  | 2.874901  |
| O  | -0.686070 | 2.180793  | 3.701760  |
| O  | -0.903397 | 0.870747  | 1.888464  |
| Pd | -0.064221 | -0.878837 | 0.989033  |
| C  | 3.716063  | 0.056221  | -1.395177 |
| C  | 2.348836  | 0.425469  | -0.479905 |
| B  | 1.069578  | -0.654785 | -0.786136 |
| B  | 1.022006  | 1.013154  | -1.472551 |
| C  | 0.046613  | 2.154505  | -0.989184 |
| C  | -1.333755 | 2.021293  | -1.221471 |
| C  | 0.494347  | 3.345239  | -0.387589 |
| C  | -2.230047 | 3.025243  | -0.864642 |
| H  | -1.717270 | 1.116110  | -1.680494 |
| C  | -0.393152 | 4.352299  | -0.023907 |
| H  | 1.554523  | 3.504278  | -0.209908 |
| C  | -1.764131 | 4.198950  | -0.261172 |
| H  | -3.290908 | 2.900710  | -1.048089 |
| H  | -0.045964 | 5.268951  | 0.440653  |
| C  | -2.669345 | 5.312953  | 0.142473  |
| O  | -2.292505 | 6.362189  | 0.627468  |
| O  | -3.970493 | 5.032926  | -0.094492 |
| C  | -4.895284 | 6.063707  | 0.283305  |
| H  | -5.883378 | 5.679595  | 0.030007  |
| H  | -4.825539 | 6.268284  | 1.354555  |
| H  | -4.689257 | 6.986484  | -0.265109 |
| C  | -2.957390 | -0.911396 | 0.842045  |
| C  | -4.231206 | -1.215561 | 0.357206  |

|   |           |           |           |
|---|-----------|-----------|-----------|
| C | -4.385842 | -2.069305 | -0.742257 |
| C | -3.253188 | -2.621955 | -1.353601 |
| C | -1.977164 | -2.339264 | -0.869499 |
| C | -1.837913 | -1.470798 | 0.218873  |
| H | -2.842117 | -0.223573 | 1.671500  |
| H | -5.104856 | -0.782961 | 0.831590  |
| H | -3.388101 | -3.284329 | -2.202333 |
| H | -1.115964 | -2.794211 | -1.341586 |
| I | 0.639069  | -3.427337 | 1.284537  |
| C | -5.721354 | -2.427537 | -1.298300 |
| O | -5.895323 | -3.156709 | -2.255696 |
| O | -6.737108 | -1.849263 | -0.616980 |
| C | -8.052041 | -2.161004 | -1.100758 |
| H | -8.236174 | -3.237063 | -1.048725 |
| H | -8.740477 | -1.622525 | -0.449511 |
| H | -8.168667 | -1.834988 | -2.137440 |

## 19

Zero-point correction= 0.588844

Thermal correction to Energy= 0.635571

Thermal correction to Enthalpy= 0.636515

Thermal correction to Gibbs Free Energy= 0.504782

Sum of electronic and zero-point Energies= -2454.039182

Sum of electronic and thermal Energies= -2453.992455

Sum of electronic and thermal Enthalpies= -2453.991511

Sum of electronic and thermal Free Energies= -2454.123244

### Cartesian coordinates

|   |           |           |           |
|---|-----------|-----------|-----------|
| B | 0.197336  | -0.016129 | 2.509439  |
| B | 2.759122  | -1.162794 | 3.190230  |
| B | 1.011954  | -1.477993 | 3.165144  |
| B | 2.043156  | -2.135290 | 1.894461  |
| B | 1.623388  | 0.148197  | 3.570454  |
| B | 1.472778  | 1.185474  | 2.123841  |
| B | 3.050514  | 0.470267  | 2.557276  |
| B | 2.518085  | 0.499969  | 0.876753  |
| H | 2.322197  | -3.255369 | 1.658190  |
| H | 3.070709  | 1.021470  | -0.013012 |
| H | 1.307011  | 2.350593  | 2.180582  |
| H | 4.037126  | 1.058960  | 2.830397  |
| H | 1.549869  | 0.591897  | 4.665709  |
| H | 3.541113  | -1.674915 | 3.912703  |
| H | 0.507386  | -2.206068 | 3.950575  |
| H | -0.889000 | 0.309354  | 2.845168  |

|    |           |           |           |
|----|-----------|-----------|-----------|
| C  | 4.579321  | -1.380900 | 1.049419  |
| C  | 5.097951  | -2.619130 | 1.461543  |
| C  | 5.352502  | -0.572900 | 0.200666  |
| C  | 6.349092  | -3.046265 | 1.020651  |
| H  | 4.531647  | -3.247862 | 2.138353  |
| C  | 6.602906  | -1.006870 | -0.239557 |
| H  | 4.994211  | 0.399456  | -0.113501 |
| C  | 7.104233  | -2.244145 | 0.164305  |
| H  | 6.733153  | -4.005871 | 1.352727  |
| H  | 7.185776  | -0.367597 | -0.895295 |
| H  | 8.079037  | -2.577276 | -0.178707 |
| C  | 1.924626  | -1.579339 | -0.827440 |
| H  | 2.295436  | -2.586368 | -1.031689 |
| N  | 1.329143  | -0.860573 | -1.693232 |
| C  | 0.769996  | -1.396782 | -2.909922 |
| H  | 1.104864  | -2.411834 | -3.148720 |
| H  | 0.990073  | -0.730754 | -3.750228 |
| C  | -0.783510 | -1.418731 | -2.696017 |
| O  | -1.467984 | -2.091917 | -3.436042 |
| O  | -1.257774 | -0.685875 | -1.706161 |
| Pd | -0.046706 | 0.825772  | -1.005916 |
| C  | 3.234142  | -0.923351 | 1.565337  |
| C  | 1.876863  | -1.072231 | 0.574268  |
| B  | 0.767277  | 0.183075  | 0.847924  |
| B  | 0.419979  | -1.465499 | 1.484065  |
| C  | -0.684004 | -2.443877 | 0.923650  |
| C  | -2.039412 | -2.082929 | 1.024769  |
| C  | -0.386200 | -3.704506 | 0.372876  |
| C  | -3.052242 | -2.932522 | 0.588106  |
| H  | -2.308184 | -1.115683 | 1.436635  |
| C  | -1.390567 | -4.558087 | -0.072409 |
| H  | 0.644062  | -4.041672 | 0.301795  |
| C  | -2.732852 | -4.176575 | 0.031055  |
| H  | -4.090539 | -2.632483 | 0.669401  |
| H  | -1.157645 | -5.527722 | -0.499369 |
| C  | -3.767204 | -5.129308 | -0.465696 |
| O  | -3.522334 | -6.227201 | -0.927048 |
| O  | -5.020649 | -4.638811 | -0.347277 |
| C  | -6.062463 | -5.503257 | -0.826017 |
| H  | -6.993218 | -4.960085 | -0.663255 |
| H  | -5.923810 | -5.718700 | -1.888362 |
| H  | -6.065286 | -6.446014 | -0.273055 |
| C  | -2.896557 | 1.343375  | -0.554062 |
| C  | -4.021403 | 2.021605  | -0.080537 |

|   |           |          |           |
|---|-----------|----------|-----------|
| C | -3.877403 | 3.198286 | 0.665268  |
| C | -2.596264 | 3.696805 | 0.929661  |
| C | -1.459758 | 3.035900 | 0.459858  |
| C | -1.627813 | 1.859256 | -0.273873 |
| H | -3.012001 | 0.430775 | -1.125426 |
| H | -5.011745 | 1.634063 | -0.291548 |
| H | -2.498493 | 4.610643 | 1.506473  |
| H | -0.476273 | 3.440348 | 0.663847  |
| C | -5.046692 | 3.955178 | 1.198152  |
| O | -4.965963 | 4.977499 | 1.850469  |
| O | -6.226318 | 3.375666 | 0.876092  |
| C | -7.393534 | 4.057143 | 1.360051  |
| H | -7.441449 | 5.072158 | 0.957725  |
| H | -8.242741 | 3.467472 | 1.014792  |
| H | -7.382345 | 4.112606 | 2.451546  |
| C | 3.021977  | 3.864606 | -1.589818 |
| C | 1.800538  | 3.399029 | -0.743016 |
| O | 1.507600  | 4.000985 | 0.272059  |
| O | 1.290185  | 2.337391 | -1.285125 |
| F | 3.513903  | 5.023503 | -1.145957 |
| F | 4.009429  | 2.934350 | -1.507602 |
| F | 2.704879  | 4.006573 | -2.888778 |

## 20-ts

Zero-point correction= 0.588029

Thermal correction to Energy= 0.634142

Thermal correction to Enthalpy= 0.635086

Thermal correction to Gibbs Free Energy= 0.505803

Sum of electronic and zero-point Energies= -2454.011921

Sum of electronic and thermal Energies= -2453.965809

Sum of electronic and thermal Enthalpies= -2453.964865

Sum of electronic and thermal Free Energies= -2454.094148

## Cartesian coordinates

|   |           |           |          |
|---|-----------|-----------|----------|
| B | -0.302174 | 0.214161  | 2.488052 |
| B | 1.677492  | -1.673942 | 3.385884 |
| B | -0.061964 | -1.422158 | 3.150421 |
| B | 0.847824  | -2.358115 | 1.976435 |
| B | 0.975856  | -0.080306 | 3.688049 |
| B | 1.307864  | 0.961272  | 2.272599 |
| B | 2.524875  | -0.211145 | 2.827486 |
| B | 2.189680  | -0.007365 | 1.095906 |
| H | 0.760192  | -3.505874 | 1.720680 |
| H | 3.011154  | 0.295062  | 0.322082 |

|    |           |           |           |
|----|-----------|-----------|-----------|
| H  | 1.523486  | 2.114440  | 2.386378  |
| H  | 3.607122  | 0.051983  | 3.220645  |
| H  | 0.922075  | 0.369683  | 4.782375  |
| H  | 2.177888  | -2.414029 | 4.159167  |
| H  | -0.862700 | -1.961239 | 3.836549  |
| H  | -1.265909 | 0.852275  | 2.741295  |
| C  | 3.573611  | -2.426539 | 1.445586  |
| C  | 3.612608  | -3.786054 | 1.795943  |
| C  | 4.679878  | -1.866397 | 0.786450  |
| C  | 4.720876  | -4.569557 | 1.479143  |
| H  | 2.783576  | -4.233077 | 2.331668  |
| C  | 5.784586  | -2.656594 | 0.468935  |
| H  | 4.693983  | -0.816839 | 0.520429  |
| C  | 5.809171  | -4.008954 | 0.809684  |
| H  | 4.732343  | -5.617597 | 1.762376  |
| H  | 6.629398  | -2.205372 | -0.042025 |
| H  | 6.672617  | -4.619305 | 0.562871  |
| C  | 1.333720  | -1.958598 | -0.669229 |
| H  | 1.293195  | -3.050401 | -0.702900 |
| N  | 1.323200  | -1.256533 | -1.732841 |
| C  | 0.787162  | -1.777940 | -2.969606 |
| H  | 0.765675  | -2.872394 | -3.027165 |
| H  | 1.332463  | -1.374180 | -3.826612 |
| C  | -0.692163 | -1.248060 | -3.005291 |
| O  | -1.479314 | -1.727780 | -3.790657 |
| O  | -1.001883 | -0.298572 | -2.135672 |
| Pd | 0.552024  | 0.789184  | -1.383913 |
| C  | 2.377692  | -1.588181 | 1.835609  |
| C  | 1.176528  | -1.306253 | 0.671913  |
| B  | 0.411029  | 0.336201  | 0.858344  |
| B  | -0.417491 | -1.202392 | 1.399533  |
| C  | -1.731789 | -1.837129 | 0.782228  |
| C  | -2.978531 | -1.306875 | 1.166298  |
| C  | -1.749848 | -2.966662 | -0.056072 |
| C  | -4.177941 | -1.854597 | 0.716661  |
| H  | -3.012848 | -0.451873 | 1.833400  |
| C  | -2.939990 | -3.521341 | -0.514740 |
| H  | -0.821669 | -3.443673 | -0.353319 |
| C  | -4.166625 | -2.966571 | -0.133633 |
| H  | -5.124476 | -1.426931 | 1.027173  |
| H  | -2.941469 | -4.387494 | -1.167498 |
| C  | -5.412360 | -3.605107 | -0.646287 |
| O  | -5.437165 | -4.604784 | -1.337189 |
| O  | -6.527926 | -2.948508 | -0.254478 |



|   |           |           |           |
|---|-----------|-----------|-----------|
| C | -7.763296 | -3.514782 | -0.718358 |
| H | -8.548939 | -2.871570 | -0.322113 |
| H | -7.792803 | -3.529801 | -1.810660 |
| H | -7.880842 | -4.536912 | -0.349589 |
| C | -2.029715 | 1.605550  | -0.207532 |
| C | -2.964784 | 2.563217  | 0.165760  |
| C | -2.538362 | 3.804996  | 0.660519  |
| C | -1.168850 | 4.081826  | 0.767727  |
| C | -0.225128 | 3.127999  | 0.402299  |
| C | -0.646430 | 1.861593  | -0.063031 |
| H | -2.363808 | 0.665271  | -0.625539 |
| H | -4.024162 | 2.360045  | 0.060587  |
| H | -0.859732 | 5.054400  | 1.135367  |
| H | 0.832528  | 3.347684  | 0.490259  |
| C | -3.500106 | 4.874886  | 1.069441  |
| O | -3.168369 | 5.963942  | 1.492726  |
| O | -4.786153 | 4.495545  | 0.915228  |
| C | -5.764041 | 5.482430  | 1.284054  |
| H | -5.640713 | 6.386556  | 0.683021  |
| H | -6.732657 | 5.021800  | 1.091882  |
| H | -5.664026 | 5.744433  | 2.340208  |
| C | 4.495676  | 2.618013  | -1.443229 |
| C | 3.072263  | 2.609421  | -0.815695 |
| O | 2.868626  | 3.239165  | 0.207454  |
| O | 2.301195  | 1.826684  | -1.496915 |
| F | 5.250372  | 3.600406  | -0.943932 |
| F | 5.103480  | 1.436227  | -1.153702 |
| F | 4.466554  | 2.743273  | -2.780353 |

## 21

Zero-point correction= 0.591292

Thermal correction to Energy= 0.637669

Thermal correction to Enthalpy= 0.638613

Thermal correction to Gibbs Free Energy= 0.506469

Sum of electronic and zero-point Energies= -2454.102611

Sum of electronic and thermal Energies= -2454.056234

Sum of electronic and thermal Enthalpies= -2454.055290

Sum of electronic and thermal Free Energies= -2454.187434

Cartesian coordinates

|   |           |           |          |
|---|-----------|-----------|----------|
| B | -1.280436 | -1.737152 | 3.106786 |
| B | 0.048145  | -4.110876 | 2.158085 |
| B | -1.541030 | -3.377810 | 2.446553 |
| B | -0.865042 | -3.392544 | 0.822308 |

|    |           |           |           |
|----|-----------|-----------|-----------|
| B  | -0.199123 | -3.067727 | 3.575260  |
| B  | 0.478821  | -1.467844 | 3.195229  |
| B  | 1.297497  | -2.931232 | 2.619042  |
| B  | 1.116981  | -1.518767 | 1.554667  |
| H  | -1.232227 | -3.984878 | -0.129010 |
| H  | 2.022455  | -0.913532 | 1.126979  |
| H  | 0.997068  | -0.787066 | 4.013601  |
| H  | 2.391563  | -3.270872 | 2.907512  |
| H  | -0.173906 | -3.518522 | 4.670474  |
| H  | 0.278576  | -5.269173 | 2.121319  |
| H  | -2.484946 | -4.045217 | 2.703179  |
| H  | -2.038604 | -1.233380 | 3.865540  |
| C  | 1.753281  | -3.736434 | -0.037815 |
| C  | 1.379573  | -4.903574 | -0.724565 |
| C  | 3.015422  | -3.176490 | -0.290753 |
| C  | 2.238593  | -5.483244 | -1.656202 |
| H  | 0.423566  | -5.371549 | -0.522277 |
| C  | 3.869658  | -3.759634 | -1.226956 |
| H  | 3.342279  | -2.288684 | 0.234538  |
| C  | 3.484750  | -4.910194 | -1.915383 |
| H  | 1.933516  | -6.387463 | -2.173999 |
| H  | 4.840944  | -3.310312 | -1.409484 |
| H  | 4.153477  | -5.362757 | -2.641425 |
| C  | -0.261605 | -1.444402 | -0.893415 |
| H  | -1.097208 | -1.890723 | -1.435139 |
| N  | 0.512078  | -0.670047 | -1.556906 |
| C  | 0.159473  | -0.410043 | -2.964693 |
| H  | -0.789356 | -0.875174 | -3.246242 |
| H  | 0.958634  | -0.811895 | -3.597584 |
| C  | 0.096871  | 1.117696  | -3.188896 |
| O  | -0.595726 | 1.594880  | -4.061019 |
| O  | 0.868287  | 1.807339  | -2.375278 |
| Pd | 2.005214  | 0.715694  | -1.170009 |
| C  | 0.835839  | -3.140726 | 0.999191  |
| C  | -0.222070 | -1.819300 | 0.551529  |
| B  | -0.471252 | -0.724123 | 1.869526  |
| B  | -1.742288 | -1.942584 | 1.399337  |
| C  | -3.126517 | -1.548433 | 0.735116  |
| C  | -3.911262 | -0.537627 | 1.323415  |
| C  | -3.661473 | -2.205497 | -0.390374 |
| C  | -5.158303 | -0.188640 | 0.810678  |
| H  | -3.539608 | -0.014093 | 2.198084  |
| C  | -4.902664 | -1.859014 | -0.916756 |
| H  | -3.116438 | -3.023029 | -0.853741 |

|   |           |           |           |
|---|-----------|-----------|-----------|
| C | -5.660242 | -0.844696 | -0.320331 |
| H | -5.744738 | 0.591952  | 1.281492  |
| H | -5.308467 | -2.369239 | -1.783926 |
| C | -6.984488 | -0.515289 | -0.923368 |
| O | -7.448483 | -1.069039 | -1.901128 |
| O | -7.620484 | 0.475387  | -0.260812 |
| C | -8.902910 | 0.843456  | -0.793490 |
| H | -9.270269 | 1.642046  | -0.149359 |
| H | -8.804388 | 1.194531  | -1.823669 |
| H | -9.585330 | -0.009913 | -0.776144 |
| C | -1.290464 | 1.409601  | 0.556379  |
| C | -1.340074 | 2.787904  | 0.359537  |
| C | -0.670819 | 3.643707  | 1.241814  |
| C | 0.043506  | 3.098973  | 2.315465  |
| C | 0.093948  | 1.720299  | 2.497164  |
| C | -0.569494 | 0.836151  | 1.621783  |
| H | -1.836082 | 0.776844  | -0.135641 |
| H | -1.890664 | 3.201214  | -0.477232 |
| H | 0.555896  | 3.772746  | 2.994073  |
| H | 0.658326  | 1.323618  | 3.334437  |
| C | -0.681349 | 5.127756  | 1.086467  |
| O | -0.113882 | 5.898985  | 1.835619  |
| O | -1.398004 | 5.527277  | 0.013871  |
| C | -1.430025 | 6.945246  | -0.209190 |
| H | -0.419523 | 7.332307  | -0.361572 |
| H | -2.033734 | 7.087777  | -1.105203 |
| H | -1.879252 | 7.459140  | 0.644512  |
| C | 5.600056  | 1.538351  | 0.393985  |
| C | 4.211677  | 1.200509  | -0.171128 |
| O | 3.575952  | 2.069074  | -0.838167 |
| O | 3.728421  | 0.044090  | 0.001249  |
| F | 5.742986  | 2.855344  | 0.558727  |
| F | 5.785233  | 0.925896  | 1.570967  |
| F | 6.541858  | 1.104826  | -0.465165 |

## 22

Zero-point correction= 0.571592

Thermal correction to Energy= 0.610008

Thermal correction to Enthalpy= 0.610952

Thermal correction to Gibbs Free Energy= 0.498116

Sum of electronic and zero-point Energies= -1801.773469

Sum of electronic and thermal Energies= -1801.735054

Sum of electronic and thermal Enthalpies= -1801.734110

Sum of electronic and thermal Free Energies= -1801.846946

Cartesian coordinates

|   |           |           |           |
|---|-----------|-----------|-----------|
| B | -0.933410 | 0.558433  | -2.942771 |
| B | -3.594828 | -0.383193 | -2.383790 |
| B | -1.966766 | -0.890725 | -2.863078 |
| B | -2.480979 | -1.089494 | -1.192653 |
| B | -2.632403 | 0.647194  | -3.465788 |
| B | -1.933911 | 1.963500  | -2.486716 |
| B | -3.574709 | 1.379355  | -2.153704 |
| B | -2.452731 | 1.720485  | -0.820709 |
| H | -2.678220 | -2.083799 | -0.592398 |
| H | -2.635013 | 2.526555  | 0.020114  |
| H | -1.745462 | 3.060355  | -2.892320 |
| H | -4.569265 | 2.014376  | -2.220994 |
| H | -2.946293 | 0.798096  | -4.598309 |
| H | -4.604030 | -0.956332 | -2.608021 |
| H | -1.806039 | -1.838968 | -3.554231 |
| H | -0.035345 | 0.640294  | -3.711948 |
| C | -4.545730 | 0.193066  | 0.185217  |
| C | -5.064149 | -1.058754 | 0.552860  |
| C | -5.126014 | 1.348061  | 0.734918  |
| C | -6.117330 | -1.152042 | 1.461715  |
| H | -4.654300 | -1.964327 | 0.123463  |
| C | -6.179736 | 1.250902  | 1.642451  |
| H | -4.764853 | 2.327316  | 0.445227  |
| C | -6.675981 | 0.000890  | 2.013886  |
| H | -6.502329 | -2.130257 | 1.732669  |
| H | -6.614580 | 2.156577  | 2.053982  |
| H | -7.496256 | -0.073670 | 2.721307  |
| C | -1.612199 | 0.032247  | 1.146290  |
| H | -2.499652 | 0.263350  | 1.749144  |
| N | -0.516916 | -0.353724 | 1.650695  |
| C | -0.420427 | -0.504116 | 3.089454  |
| H | -1.381249 | -0.474779 | 3.619754  |
| H | 0.201130  | 0.315504  | 3.475233  |
| C | 0.304595  | -1.805403 | 3.469423  |
| O | 0.234061  | -2.265905 | 4.581730  |
| O | 1.042633  | -2.358185 | 2.496932  |
| C | -3.436174 | 0.307703  | -0.834778 |
| C | -1.778075 | 0.219047  | -0.332984 |
| B | -0.786645 | 1.252538  | -1.305908 |
| B | -0.800052 | -0.551189 | -1.545280 |
| C | 0.372786  | -1.569727 | -1.219616 |
| C | 1.639568  | -1.170092 | -0.748128 |

|   |           |           |           |
|---|-----------|-----------|-----------|
| C | 0.184903  | -2.944396 | -1.463996 |
| C | 2.660860  | -2.091925 | -0.525229 |
| H | 1.834139  | -0.123462 | -0.548778 |
| C | 1.197542  | -3.873674 | -1.242772 |
| H | -0.769519 | -3.297425 | -1.840999 |
| C | 2.445185  | -3.454954 | -0.769507 |
| H | 3.626162  | -1.759894 | -0.160305 |
| H | 1.040138  | -4.930476 | -1.430473 |
| C | 3.494242  | -4.490623 | -0.544675 |
| O | 3.342254  | -5.678403 | -0.754018 |
| O | 4.648047  | -3.963249 | -0.077659 |
| C | 5.694467  | -4.912666 | 0.176827  |
| H | 6.537569  | -4.329130 | 0.546386  |
| H | 5.376227  | -5.643548 | 0.924350  |
| H | 5.965467  | -5.442337 | -0.740019 |
| C | 1.549241  | 2.328402  | -1.533721 |
| C | 2.618639  | 3.106502  | -1.095993 |
| C | 2.586623  | 3.688705  | 0.177225  |
| C | 1.467455  | 3.486038  | 0.993765  |
| C | 0.405365  | 2.707103  | 0.545958  |
| C | 0.419772  | 2.099607  | -0.723879 |
| H | 1.593093  | 1.888706  | -2.525147 |
| H | 3.478021  | 3.266022  | -1.737193 |
| H | 1.449682  | 3.951278  | 1.973776  |
| H | -0.452103 | 2.580470  | 1.199194  |
| C | 3.698455  | 4.527014  | 0.708719  |
| O | 3.700291  | 5.051305  | 1.805935  |
| O | 4.721899  | 4.643266  | -0.167476 |
| C | 5.829200  | 5.436565  | 0.286614  |
| H | 6.263237  | 5.008280  | 1.193638  |
| H | 6.553451  | 5.423956  | -0.527739 |
| H | 5.508537  | 6.459342  | 0.499991  |
| H | 0.936266  | -1.842019 | 1.673925  |

### 23-ts

Zero-point correction= 0.462331

Thermal correction to Energy= 0.498918

Thermal correction to Enthalpy= 0.499863

Thermal correction to Gibbs Free Energy= 0.393791

Sum of electronic and zero-point Energies= -1995.188525

Sum of electronic and thermal Energies= -1995.151938

Sum of electronic and thermal Enthalpies= -1995.150994

Sum of electronic and thermal Free Energies= -1995.257065

## Cartesian coordinates

|    |           |           |           |
|----|-----------|-----------|-----------|
| B  | -1.200762 | -2.160754 | -1.672857 |
| B  | 1.263711  | -1.846314 | -3.130636 |
| B  | -0.040039 | -0.932011 | -2.287765 |
| B  | -0.384518 | -2.465622 | -3.204042 |
| B  | -0.530367 | -3.764827 | -1.986381 |
| B  | 0.955088  | -3.594795 | -2.939012 |
| B  | 1.041461  | -3.907713 | -1.194470 |
| H  | 1.469018  | -4.859779 | -0.634943 |
| H  | -0.643620 | -3.425363 | 0.646305  |
| H  | -1.247171 | -4.702824 | -2.087321 |
| H  | 1.314002  | -4.383534 | -3.746923 |
| H  | -0.997942 | -2.438253 | -4.217375 |
| H  | 1.847915  | -1.321171 | -4.012642 |
| H  | -0.307181 | 0.130594  | -2.726986 |
| H  | -2.365491 | -1.965881 | -1.614857 |
| C  | 2.041195  | -2.431154 | 0.842317  |
| H  | 2.466099  | -3.400812 | 1.122736  |
| N  | 1.938030  | -1.488124 | 1.694294  |
| C  | 1.995833  | -1.777851 | 3.113127  |
| H  | 2.452063  | -0.946936 | 3.658032  |
| H  | 2.522835  | -2.707710 | 3.357117  |
| C  | 0.503065  | -1.927588 | 3.543128  |
| O  | 0.215053  | -2.425011 | 4.608701  |
| O  | -0.402178 | -1.511800 | 2.664678  |
| Pd | 0.222148  | -0.140908 | 1.282100  |
| C  | 1.360164  | -2.390494 | -0.490111 |
| B  | -0.271167 | -2.982444 | -0.384897 |
| B  | -0.309058 | -1.196519 | -0.542559 |
| C  | -1.656418 | -0.064930 | 0.377705  |
| C  | -2.051377 | 1.015999  | -0.440065 |
| C  | -2.646600 | -0.836661 | 1.034014  |
| C  | -3.403462 | 1.270995  | -0.650756 |
| H  | -1.303498 | 1.636545  | -0.918632 |
| C  | -3.990843 | -0.572340 | 0.817714  |
| H  | -2.354873 | -1.636494 | 1.702765  |
| C  | -4.376728 | 0.477197  | -0.029909 |
| H  | -3.705127 | 2.089616  | -1.293619 |
| H  | -4.760857 | -1.163373 | 1.301492  |
| C  | -5.843269 | 0.708674  | -0.224401 |
| O  | -6.710128 | 0.043240  | 0.305513  |
| O  | -6.093291 | 1.739398  | -1.055247 |
| C  | -7.485157 | 2.017444  | -1.288220 |
| H  | -7.503727 | 2.863441  | -1.974384 |

|   |           |           |           |
|---|-----------|-----------|-----------|
| H | -7.978758 | 1.149313  | -1.731474 |
| H | -7.986210 | 2.269273  | -0.350504 |
| C | 1.925786  | 3.782350  | 0.526151  |
| C | 1.009986  | 2.631653  | 0.010490  |
| O | 0.287232  | 2.849988  | -0.946154 |
| O | 1.157945  | 1.571115  | 0.735346  |
| F | 3.050922  | 3.336456  | 1.109459  |
| F | 2.274312  | 4.594254  | -0.482838 |
| F | 1.245537  | 4.510608  | 1.436279  |
| B | 2.173081  | -2.797921 | -1.948868 |
| C | 1.503272  | -1.214484 | -1.567865 |
| H | 3.347897  | -2.894749 | -1.918103 |
| C | 2.558752  | -0.133648 | -1.471199 |
| C | 2.413600  | 1.029599  | -2.241222 |
| C | 3.749699  | -0.307291 | -0.749079 |
| C | 3.407783  | 2.006891  | -2.252710 |
| H | 1.514913  | 1.188663  | -2.821398 |
| C | 4.742929  | 0.669757  | -0.762612 |
| H | 3.928304  | -1.210543 | -0.180712 |
| C | 4.573514  | 1.836823  | -1.507173 |
| H | 3.257953  | 2.907178  | -2.839529 |
| H | 5.652493  | 0.512070  | -0.191053 |
| H | 5.344473  | 2.601008  | -1.511932 |

## 24

Zero-point correction= 0.258185

Thermal correction to Energy= 0.270645

Thermal correction to Enthalpy= 0.271589

Thermal correction to Gibbs Free Energy= 0.220604

Sum of electronic and zero-point Energies= -562.903835

Sum of electronic and thermal Energies= -562.891375

Sum of electronic and thermal Enthalpies= -562.890431

Sum of electronic and thermal Free Energies= -562.941415

### Cartesian coordinates

|   |          |           |           |
|---|----------|-----------|-----------|
| B | 2.405080 | 0.337784  | 1.479046  |
| B | 0.945303 | -1.541947 | -0.146703 |
| B | 0.933922 | -0.666306 | 1.402448  |
| B | 2.461156 | -1.286867 | 0.738044  |
| B | 3.325290 | 0.067688  | -0.031506 |
| B | 2.414916 | -1.097590 | -1.040638 |
| B | 2.336847 | 0.640159  | -1.390628 |
| H | 2.675245 | 1.191397  | -2.381262 |

|   |           |           |           |
|---|-----------|-----------|-----------|
| H | 2.659120  | 2.658674  | 0.189087  |
| H | 4.507760  | 0.141759  | -0.068168 |
| H | 2.929258  | -1.860630 | -1.787588 |
| H | 3.015831  | -2.197695 | 1.256052  |
| H | 0.358663  | -2.560435 | -0.265219 |
| H | 0.304673  | -1.079473 | 2.314534  |
| H | 2.912964  | 0.603068  | 2.516511  |
| C | 0.886022  | 1.143667  | -0.661292 |
| B | 2.324573  | 1.524327  | 0.155447  |
| B | 0.862186  | 1.071279  | 1.053412  |
| B | 0.871411  | -0.364048 | -1.471051 |
| C | 0.053339  | -0.087515 | 0.043882  |
| H | 0.191287  | -0.472789 | -2.429215 |
| H | 0.185212  | 1.841710  | 1.636101  |
| H | 0.277303  | 1.914310  | -1.115219 |
| C | -1.457389 | -0.034709 | 0.016827  |
| C | -2.200416 | -1.222988 | 0.019559  |
| C | -2.143552 | 1.188260  | 0.005647  |
| C | -3.594286 | -1.186755 | 0.004576  |
| H | -1.690616 | -2.178167 | 0.036060  |
| C | -3.537412 | 1.221238  | -0.016327 |
| H | -1.598996 | 2.125997  | 0.032823  |
| C | -4.269191 | 0.033781  | -0.017388 |
| H | -4.150847 | -2.119064 | 0.009287  |
| H | -4.048408 | 2.179250  | -0.025301 |
| H | -5.354563 | 0.059828  | -0.030736 |

## 25-ts

Zero-point correction= 0.494826

Thermal correction to Energy= 0.534076

Thermal correction to Enthalpy= 0.535020

Thermal correction to Gibbs Free Energy= 0.422680

Sum of electronic and zero-point Energies= -2109.681050

Sum of electronic and thermal Energies= -2109.641800

Sum of electronic and thermal Enthalpies= -2109.640856

Sum of electronic and thermal Free Energies= -2109.753196

## Cartesian coordinates

|   |           |           |           |
|---|-----------|-----------|-----------|
| B | -1.831005 | -2.044155 | -1.752602 |
| B | 0.678042  | -2.083184 | -3.162206 |
| B | -0.500979 | -1.003887 | -2.345990 |
| B | -1.040983 | -2.456584 | -3.279468 |
| B | -1.406402 | -3.731517 | -2.086823 |



|    |           |           |           |
|----|-----------|-----------|-----------|
| B  | 0.117836  | -3.767755 | -2.998124 |
| B  | 0.107169  | -4.111958 | -1.259939 |
| H  | 0.389528  | -5.121297 | -0.708704 |
| H  | -1.541954 | -3.405414 | 0.550187  |
| H  | -2.249069 | -4.553435 | -2.220330 |
| H  | 0.388469  | -4.592001 | -3.805043 |
| H  | -1.620924 | -2.328107 | -4.304723 |
| H  | 1.363173  | -1.641691 | -4.017087 |
| H  | -0.609767 | 0.096469  | -2.757664 |
| H  | -2.952163 | -1.672660 | -1.710402 |
| C  | 1.262705  | -2.864328 | 0.828295  |
| H  | 1.524562  | -3.901457 | 1.062120  |
| N  | 1.282330  | -1.962187 | 1.728419  |
| C  | 1.229425  | -2.324112 | 3.130085  |
| H  | 1.793153  | -1.609472 | 3.735601  |
| H  | 1.578552  | -3.341480 | 3.342099  |
| C  | -0.288608 | -2.234155 | 3.494961  |
| O  | -0.701165 | -2.724986 | 4.522114  |
| O  | -1.068636 | -1.628962 | 2.608083  |
| Pd | -0.147264 | -0.337726 | 1.316178  |
| C  | 0.619475  | -2.663267 | -0.512021 |
| B  | -1.081091 | -3.025431 | -0.469576 |
| B  | -0.766176 | -1.268713 | -0.604241 |
| C  | -1.920393 | 0.086812  | 0.302410  |
| C  | -2.063793 | 1.261214  | -0.468510 |
| C  | -3.069676 | -0.500056 | 0.888111  |
| C  | -3.328363 | 1.796921  | -0.694791 |
| H  | -1.190953 | 1.748445  | -0.885144 |
| C  | -4.324850 | 0.042658  | 0.657632  |
| H  | -2.968129 | -1.375491 | 1.517092  |
| C  | -4.462195 | 1.189457  | -0.139440 |
| H  | -3.436514 | 2.691625  | -1.296624 |
| H  | -5.213894 | -0.402216 | 1.091225  |
| C  | -5.843239 | 1.726782  | -0.351009 |
| O  | -6.844919 | 1.228192  | 0.121585  |
| O  | -5.850881 | 2.828891  | -1.126643 |
| C  | -7.148093 | 3.399878  | -1.370200 |
| H  | -6.971303 | 4.268759  | -2.003265 |
| H  | -7.794118 | 2.678280  | -1.875966 |
| H  | -7.617693 | 3.696577  | -0.429301 |
| C  | 2.319337  | 3.201502  | 0.913418  |
| C  | 1.202037  | 2.312859  | 0.286127  |
| O  | 0.538917  | 2.770198  | -0.627514 |
| O  | 1.144232  | 1.170316  | 0.889351  |

|   |          |           |           |
|---|----------|-----------|-----------|
| F | 3.382352 | 2.484972  | 1.334225  |
| F | 2.756431 | 4.109871  | 0.033824  |
| F | 1.818222 | 3.854391  | 1.983226  |
| B | 1.403398 | -3.156344 | -1.960509 |
| C | 0.958865 | -1.491644 | -1.579297 |
| H | 2.551907 | -3.416224 | -1.893609 |
| C | 2.142853 | -0.568490 | -1.434514 |
| C | 2.194706 | 0.609439  | -2.200948 |
| C | 3.267914 | -0.893738 | -0.667625 |
| C | 3.300066 | 1.444745  | -2.160305 |
| H | 1.356866 | 0.891896  | -2.824380 |
| C | 4.381547 | -0.058937 | -0.609626 |
| H | 3.303282 | -1.813708 | -0.098734 |
| C | 4.398297 | 1.131535  | -1.346807 |
| H | 3.321557 | 2.365213  | -2.732844 |
| H | 5.221395 | -0.344450 | 0.011738  |
| O | 5.417370 | 2.025729  | -1.350805 |
| C | 6.474373 | 1.849647  | -0.415636 |
| H | 7.131931 | 2.710410  | -0.542530 |
| H | 6.091491 | 1.831193  | 0.611372  |
| H | 7.042686 | 0.932109  | -0.613511 |

## 26-ts

Zero-point correction= 0.495687

Thermal correction to Energy= 0.534873

Thermal correction to Enthalpy= 0.535817

Thermal correction to Gibbs Free Energy= 0.422401

Sum of electronic and zero-point Energies= -2109.697996

Sum of electronic and thermal Energies= -2109.658810

Sum of electronic and thermal Enthalpies= -2109.657865

Sum of electronic and thermal Free Energies= -2109.771281

## Cartesian coordinates

|   |           |           |           |
|---|-----------|-----------|-----------|
| B | -1.025371 | -2.227605 | -1.437445 |
| B | 1.300426  | -0.993657 | -2.608450 |
| B | -0.388580 | -0.697983 | -2.127571 |
| B | 0.929630  | -0.147839 | -1.087841 |
| B | 0.091197  | -2.282762 | -2.814623 |
| B | 0.282937  | -3.436238 | -1.464075 |
| B | 1.706137  | -2.686626 | -2.221227 |
| B | 1.599073  | -2.856955 | -0.462927 |
| H | 1.304947  | 0.934047  | -0.850831 |
| H | 2.341892  | -3.467453 | 0.220768  |

|    |           |           |           |
|----|-----------|-----------|-----------|
| H  | -0.428077 | -3.035722 | 1.062776  |
| H  | 0.079749  | -4.600082 | -1.549786 |
| H  | 2.572564  | -3.246730 | -2.797366 |
| H  | -0.263239 | -2.614972 | -3.895091 |
| H  | 1.889528  | -0.409658 | -3.449583 |
| H  | -1.037721 | 0.077425  | -2.735205 |
| H  | -2.160477 | -2.547697 | -1.519992 |
| C  | 3.606395  | -1.006078 | -0.994001 |
| C  | 4.024402  | 0.338965  | -1.014875 |
| C  | 4.584920  | -1.996480 | -0.835218 |
| C  | 5.361828  | 0.670181  | -0.862145 |
| H  | 3.308552  | 1.139792  | -1.153382 |
| C  | 5.933055  | -1.674507 | -0.685708 |
| H  | 4.302768  | -3.042968 | -0.841930 |
| C  | 6.331158  | -0.331437 | -0.694654 |
| H  | 5.682798  | 1.706094  | -0.877527 |
| H  | 6.655770  | -2.472969 | -0.570729 |
| C  | 1.663495  | -1.008819 | 1.479565  |
| H  | 2.355293  | -1.738831 | 1.910212  |
| N  | 1.162007  | -0.071192 | 2.181610  |
| C  | 1.111849  | -0.183863 | 3.623679  |
| H  | 1.182256  | 0.801714  | 4.090713  |
| H  | 1.872592  | -0.849205 | 4.048565  |
| C  | -0.301389 | -0.800617 | 3.916459  |
| O  | -0.539415 | -1.260603 | 5.011665  |
| O  | -1.160985 | -0.810663 | 2.908302  |
| Pd | -0.822054 | 0.533469  | 1.408912  |
| C  | 2.165967  | -1.398433 | -1.197799 |
| C  | 1.118681  | -1.323517 | 0.118066  |
| B  | -0.090031 | -2.546119 | 0.041153  |
| B  | -0.586591 | -0.872569 | -0.366249 |
| C  | -2.414982 | -0.173828 | 0.270187  |
| C  | -3.021940 | 0.664591  | -0.690008 |
| C  | -3.188228 | -1.179271 | 0.898020  |
| C  | -4.354109 | 0.467096  | -1.044796 |
| H  | -2.441833 | 1.443578  | -1.171099 |
| C  | -4.512886 | -1.370943 | 0.534139  |
| H  | -2.746965 | -1.797162 | 1.670100  |
| C  | -5.102516 | -0.551761 | -0.440963 |
| H  | -4.815337 | 1.104185  | -1.790441 |
| H  | -5.113930 | -2.145018 | 0.998835  |
| C  | -6.534347 | -0.807927 | -0.788952 |
| O  | -7.210696 | -1.683397 | -0.286639 |
| O  | -6.995408 | 0.044146  | -1.727352 |

|   |           |           |           |
|---|-----------|-----------|-----------|
| C | -8.367359 | -0.148757 | -2.110129 |
| H | -8.571716 | 0.612691  | -2.862218 |
| H | -8.511790 | -1.149310 | -2.525044 |
| H | -9.026498 | -0.025867 | -1.247312 |
| C | 0.713840  | 4.123895  | -0.501076 |
| C | -0.299886 | 2.944818  | -0.551375 |
| O | -0.289901 | 2.309305  | 0.574262  |
| O | -0.899585 | 2.722978  | -1.588941 |
| F | 0.506425  | 4.994210  | -1.493479 |
| F | 0.671755  | 4.791879  | 0.663421  |
| F | 1.968885  | 3.620764  | -0.642205 |
| O | 7.609499  | 0.098595  | -0.556284 |
| C | 8.641243  | -0.868840 | -0.402484 |
| H | 9.569786  | -0.303724 | -0.316531 |
| H | 8.497572  | -1.469016 | 0.504395  |
| H | 8.701019  | -1.533995 | -1.272521 |

## 27

Zero-point correction= 0.290605

Thermal correction to Energy= 0.305764

Thermal correction to Enthalpy= 0.306708

Thermal correction to Gibbs Free Energy= 0.248719

Sum of electronic and zero-point Energies= -677.395927

Sum of electronic and thermal Energies= -677.380768

Sum of electronic and thermal Enthalpies= -677.379823

Sum of electronic and thermal Free Energies= -677.437813

## Cartesian coordinates

|   |           |           |           |
|---|-----------|-----------|-----------|
| B | -3.219846 | -0.443994 | 1.395990  |
| B | -1.631461 | 1.558197  | 0.065794  |
| B | -1.704911 | 0.489857  | 1.487652  |
| B | -3.183689 | 1.263166  | 0.873902  |
| B | -4.084170 | 0.062538  | -0.087374 |
| B | -3.094006 | 1.305070  | -0.913593 |
| B | -3.081862 | -0.375056 | -1.486558 |
| H | -3.416265 | -0.776502 | -2.548146 |
| H | -3.534771 | -2.562751 | -0.190797 |
| H | -5.267335 | 0.048859  | -0.159555 |
| H | -3.552298 | 2.182927  | -1.565014 |
| H | -3.712017 | 2.125102  | 1.493491  |
| H | -1.001007 | 2.556911  | 0.100663  |
| H | -1.086596 | 0.752669  | 2.460939  |
| H | -3.768868 | -0.819363 | 2.377155  |

|   |           |           |           |
|---|-----------|-----------|-----------|
| C | -1.675599 | -1.035076 | -0.796290 |
| B | -3.151132 | -1.449936 | -0.070233 |
| B | -1.697176 | -1.185390 | 0.913523  |
| B | -1.573011 | 0.560955  | -1.399754 |
| C | -0.807991 | 0.053785  | 0.084825  |
| H | -0.861432 | 0.761814  | -2.319347 |
| H | -1.080137 | -2.059463 | 1.409474  |
| H | -1.084326 | -1.767477 | -1.330025 |
| C | 0.696648  | -0.065908 | 0.061747  |
| C | 1.500134  | 1.078466  | 0.062439  |
| C | 1.335034  | -1.318480 | 0.032737  |
| C | 2.892422  | 0.991928  | 0.035259  |
| H | 1.041008  | 2.059159  | 0.083893  |
| C | 2.717911  | -1.418703 | -0.002365 |
| H | 0.753030  | -2.233663 | 0.049037  |
| C | 3.512517  | -0.262442 | -0.001116 |
| H | 3.475488  | 1.904807  | 0.039201  |
| H | 3.207963  | -2.386155 | -0.025708 |
| O | 4.855832  | -0.465575 | -0.035860 |
| C | 5.711454  | 0.669625  | -0.038282 |
| H | 6.728818  | 0.277865  | -0.069473 |
| H | 5.539799  | 1.301280  | -0.918746 |
| H | 5.583440  | 1.272384  | 0.869368  |

### 28-ts

Zero-point correction= 0.467313

Thermal correction to Energy= 0.507459

Thermal correction to Enthalpy= 0.508403

Thermal correction to Gibbs Free Energy= 0.394009

Sum of electronic and zero-point Energies= -2332.215146

Sum of electronic and thermal Energies= -2332.175000

Sum of electronic and thermal Enthalpies= -2332.174056

Sum of electronic and thermal Free Energies= -2332.288450

### Cartesian coordinates

|   |           |           |           |
|---|-----------|-----------|-----------|
| B | -2.133132 | -1.718446 | -1.951490 |
| B | 0.455372  | -1.904188 | -3.203249 |
| B | -0.645037 | -0.779161 | -2.322800 |
| B | -1.282193 | -2.053589 | -3.457006 |
| B | -1.865459 | -3.397616 | -2.434000 |
| B | -0.303767 | -3.519404 | -3.265714 |
| B | -0.460484 | -4.038494 | -1.576024 |
| H | -0.343683 | -5.126255 | -1.122972 |

|    |           |           |           |
|----|-----------|-----------|-----------|
| H  | -2.128978 | -3.344525 | 0.205842  |
| H  | -2.784805 | -4.095307 | -2.700988 |
| H  | -0.085210 | -4.276373 | -4.150217 |
| H  | -1.771444 | -1.750317 | -4.492421 |
| H  | 1.231349  | -1.452109 | -3.970491 |
| H  | -0.589476 | 0.357892  | -2.634211 |
| H  | -3.210351 | -1.231063 | -1.939227 |
| C  | 0.678629  | -3.117380 | 0.698003  |
| H  | 0.825368  | -4.188703 | 0.871137  |
| N  | 0.713695  | -2.284842 | 1.663228  |
| C  | 0.547724  | -2.739590 | 3.029569  |
| H  | 1.136741  | -2.124265 | 3.715179  |
| H  | 0.797475  | -3.796141 | 3.180517  |
| C  | -0.971702 | -2.541524 | 3.326945  |
| O  | -1.486750 | -3.070971 | 4.285696  |
| O  | -1.645948 | -1.795835 | 2.458004  |
| Pd | -0.551994 | -0.499943 | 1.318036  |
| C  | 0.168000  | -2.749504 | -0.660174 |
| B  | -1.563349 | -2.895719 | -0.730355 |
| B  | -1.152467 | -1.148797 | -0.647403 |
| C  | -2.248439 | 0.204395  | 0.333799  |
| C  | -2.257600 | 1.433960  | -0.359289 |
| C  | -3.468021 | -0.337536 | 0.807337  |
| C  | -3.466253 | 2.068899  | -0.630566 |
| H  | -1.327902 | 1.875078  | -0.698438 |
| C  | -4.666054 | 0.305148  | 0.531269  |
| H  | -3.467042 | -1.254673 | 1.382935  |
| C  | -4.672673 | 1.507159  | -0.192742 |
| H  | -3.474421 | 3.003677  | -1.178731 |
| H  | -5.610395 | -0.103144 | 0.874563  |
| C  | -5.998762 | 2.150486  | -0.458605 |
| O  | -7.059942 | 1.692375  | -0.086003 |
| O  | -5.880738 | 3.295223  | -1.158644 |
| C  | -7.118077 | 3.968780  | -1.450193 |
| H  | -6.840293 | 4.861960  | -2.008679 |
| H  | -7.770203 | 3.326815  | -2.047156 |
| H  | -7.634105 | 4.236031  | -0.525064 |
| C  | 2.196405  | 2.863792  | 1.209862  |
| C  | 1.071078  | 2.068437  | 0.480743  |
| O  | 0.541697  | 2.569922  | -0.495751 |
| O  | 0.855944  | 0.936209  | 1.068399  |
| F  | 3.075765  | 2.065698  | 1.836481  |
| F  | 2.870086  | 3.625324  | 0.336606  |
| F  | 1.635085  | 3.672803  | 2.131906  |

|   |          |           |           |
|---|----------|-----------|-----------|
| B | 0.981890 | -3.190822 | -2.107089 |
| C | 0.699708 | -1.540248 | -1.560355 |
| H | 2.086578 | -3.594418 | -2.019644 |
| C | 1.980355 | -0.793354 | -1.254854 |
| C | 2.219874 | 0.435446  | -1.888141 |
| C | 3.005531 | -1.346084 | -0.472746 |
| C | 3.423020 | 1.110681  | -1.706151 |
| H | 1.460747 | 0.884256  | -2.513506 |
| C | 4.208671 | -0.672060 | -0.285651 |
| H | 2.890386 | -2.316576 | -0.009561 |
| C | 4.418163 | 0.564832  | -0.894733 |
| H | 3.581008 | 2.066324  | -2.192828 |
| H | 4.988176 | -1.114592 | 0.323954  |
| C | 5.688081 | 1.335758  | -0.646212 |
| F | 5.524055 | 2.257119  | 0.326441  |
| F | 6.091089 | 1.996026  | -1.753495 |
| F | 6.699406 | 0.525314  | -0.262704 |

### 29-ts

Zero-point correction= 0.467880

Thermal correction to Energy= 0.508066

Thermal correction to Enthalpy= 0.509010

Thermal correction to Gibbs Free Energy= 0.392470

Sum of electronic and zero-point Energies= -2332.230694

Sum of electronic and thermal Energies= -2332.190509

Sum of electronic and thermal Enthalpies= -2332.189565

Sum of electronic and thermal Free Energies= -2332.306105

### Cartesian coordinates

|   |           |           |           |
|---|-----------|-----------|-----------|
| B | -1.420710 | -2.201737 | -1.458579 |
| B | 0.941118  | -1.003173 | -2.592323 |
| B | -0.745928 | -0.677609 | -2.122830 |
| B | 0.571509  | -0.168516 | -1.064250 |
| B | -0.292657 | -2.262986 | -2.827342 |
| B | -0.141319 | -3.439790 | -1.490812 |
| B | 1.305641  | -2.711797 | -2.224704 |
| B | 1.179094  | -2.907965 | -0.470317 |
| H | 0.971804  | 0.900356  | -0.810833 |
| H | 1.907074  | -3.540660 | 0.209151  |
| H | -0.861810 | -3.053444 | 1.036817  |
| H | -0.369585 | -4.597120 | -1.595109 |
| H | 2.166770  | -3.279752 | -2.800721 |
| H | -0.643480 | -2.572541 | -3.915350 |

|    |           |           |           |
|----|-----------|-----------|-----------|
| H  | 1.555218  | -0.422060 | -3.417359 |
| H  | -1.371005 | 0.120665  | -2.725627 |
| H  | -2.561343 | -2.496277 | -1.555159 |
| C  | 3.232189  | -1.093454 | -0.959083 |
| C  | 3.669398  | 0.239750  | -0.914415 |
| C  | 4.183276  | -2.120030 | -0.850492 |
| C  | 5.020353  | 0.533946  | -0.743922 |
| H  | 2.968596  | 1.058241  | -1.018054 |
| C  | 5.533389  | -1.824978 | -0.683587 |
| H  | 3.874237  | -3.156480 | -0.911747 |
| C  | 5.954617  | -0.495825 | -0.624684 |
| H  | 5.346147  | 1.567959  | -0.717896 |
| H  | 6.259112  | -2.627207 | -0.611220 |
| C  | 1.268240  | -1.083587 | 1.500225  |
| H  | 1.934599  | -1.836944 | 1.931274  |
| N  | 0.778727  | -0.143084 | 2.206504  |
| C  | 0.709128  | -0.269152 | 3.646753  |
| H  | 0.796697  | 0.709998  | 4.124235  |
| H  | 1.448966  | -0.956117 | 4.073829  |
| C  | -0.721695 | -0.855299 | 3.917161  |
| O  | -0.982373 | -1.322168 | 5.003729  |
| O  | -1.571142 | -0.833247 | 2.900070  |
| Pd | -1.186376 | 0.517422  | 1.419278  |
| C  | 1.777676  | -1.448247 | -1.175529 |
| C  | 0.734229  | -1.366776 | 0.126610  |
| B  | -0.504532 | -2.560491 | 0.023640  |
| B  | -0.964872 | -0.869640 | -0.365396 |
| C  | -2.785051 | -0.143469 | 0.264037  |
| C  | -3.366616 | 0.718625  | -0.690808 |
| C  | -3.581370 | -1.144226 | 0.870318  |
| C  | -4.697703 | 0.547757  | -1.063204 |
| H  | -2.768248 | 1.494605  | -1.154161 |
| C  | -4.904431 | -1.309097 | 0.488352  |
| H  | -3.159462 | -1.779311 | 1.639245  |
| C  | -5.469105 | -0.467170 | -0.482210 |
| H  | -5.140387 | 1.202519  | -1.804739 |
| H  | -5.523441 | -2.079323 | 0.935537  |
| C  | -6.901026 | -0.696002 | -0.850294 |
| O  | -7.595624 | -1.567845 | -0.367268 |
| O  | -7.337315 | 0.175558  | -1.781857 |
| C  | -8.708021 | 0.009778  | -2.183080 |
| H  | -8.891245 | 0.784214  | -2.927210 |
| H  | -8.863093 | -0.982871 | -2.612735 |
| H  | -9.374764 | 0.131964  | -1.326098 |



|   |           |           |           |
|---|-----------|-----------|-----------|
| C | 0.462140  | 4.078326  | -0.449575 |
| C | -0.589718 | 2.933876  | -0.513759 |
| O | -0.600484 | 2.286178  | 0.605287  |
| O | -1.195516 | 2.741275  | -1.553489 |
| F | 0.300623  | 4.952608  | -1.445938 |
| F | 0.425290  | 4.747714  | 0.713599  |
| F | 1.702317  | 3.531419  | -0.570693 |
| C | 7.407183  | -0.171330 | -0.383678 |
| F | 7.770021  | 0.974252  | -0.996133 |
| F | 8.218830  | -1.153061 | -0.829177 |
| F | 7.658617  | -0.014069 | 0.935407  |

### 30

Zero-point correction= 0.262816

Thermal correction to Energy= 0.278981

Thermal correction to Enthalpy= 0.279925

Thermal correction to Gibbs Free Energy= 0.218615

Sum of electronic and zero-point Energies= -899.930234

Sum of electronic and thermal Energies= -899.914069

Sum of electronic and thermal Enthalpies= -899.913125

Sum of electronic and thermal Free Energies= -899.974436

#### Cartesian coordinates

|   |           |           |           |
|---|-----------|-----------|-----------|
| B | -3.746540 | -0.334103 | 1.494056  |
| B | -2.315688 | 1.539266  | -0.165145 |
| B | -2.283385 | 0.679378  | 1.393237  |
| B | -3.820878 | 1.282847  | 0.736566  |
| B | -4.682514 | -0.085361 | -0.011090 |
| B | -3.789468 | 1.075676  | -1.040685 |
| B | -3.702576 | -0.665640 | -1.373744 |
| H | -4.045429 | -1.229152 | -2.355616 |
| H | -3.997193 | -2.670023 | 0.229717  |
| H | -5.864473 | -0.167512 | -0.036201 |
| H | -4.315254 | 1.827270  | -1.790827 |
| H | -4.376258 | 2.195143  | 1.250556  |
| H | -1.734713 | 2.558967  | -0.299788 |
| H | -1.646203 | 1.105518  | 2.293709  |
| H | -4.242404 | -0.591545 | 2.538968  |
| C | -2.242464 | -1.152780 | -0.652472 |
| B | -3.671322 | -1.533931 | 0.181496  |
| B | -2.203848 | -1.063031 | 1.061639  |
| B | -2.244974 | 0.348018  | -1.478612 |
| C | -1.414074 | 0.091863  | 0.032022  |

|   |           |           |           |
|---|-----------|-----------|-----------|
| H | -1.572753 | 0.450910  | -2.442980 |
| H | -1.513422 | -1.821372 | 1.644553  |
| H | -1.633985 | -1.924414 | -1.105173 |
| C | 0.096390  | 0.051260  | -0.001949 |
| C | 0.829531  | 1.245708  | -0.000920 |
| C | 0.793597  | -1.165131 | -0.016437 |
| C | 2.221586  | 1.224511  | -0.017218 |
| H | 0.313416  | 2.197131  | 0.013370  |
| C | 2.185572  | -1.188583 | -0.039156 |
| H | 0.259586  | -2.108406 | 0.007226  |
| C | 2.904321  | 0.007446  | -0.039138 |
| H | 2.775791  | 2.156667  | -0.021546 |
| H | 2.711495  | -2.136654 | -0.057727 |
| C | 4.409908  | -0.016023 | 0.000925  |
| F | 4.908426  | -1.117791 | -0.600494 |
| F | 4.942858  | 1.062893  | -0.611038 |
| F | 4.868890  | -0.017076 | 1.272558  |

### 31-ts

Zero-point correction= 0.372998

Thermal correction to Energy= 0.405792

Thermal correction to Enthalpy= 0.406736

Thermal correction to Gibbs Free Energy= 0.308624

Sum of electronic and zero-point Energies= -1863.457424

Sum of electronic and thermal Energies= -1863.424630

Sum of electronic and thermal Enthalpies= -1863.423685

Sum of electronic and thermal Free Energies= -1863.521798

### Cartesian coordinates

|   |           |           |           |
|---|-----------|-----------|-----------|
| B | -0.471230 | -2.252539 | -1.687034 |
| B | 1.748862  | -1.297553 | -3.278245 |
| B | 0.275639  | -0.775731 | -2.378727 |
| B | 0.312457  | -2.333708 | -3.280312 |
| B | 0.571478  | -3.631326 | -2.081294 |
| B | 1.917183  | -3.071314 | -3.110069 |
| B | 2.172842  | -3.385199 | -1.376858 |
| H | 2.865242  | -4.197765 | -0.865707 |
| H | 0.505426  | -3.352293 | 0.567500  |
| H | 0.118253  | -4.720670 | -2.181073 |
| H | 2.417640  | -3.735018 | -3.953396 |
| H | -0.340441 | -2.461998 | -4.259985 |
| H | 2.140908  | -0.597941 | -4.144898 |
| H | -0.224272 | 0.218094  | -2.760653 |

|    |           |           |           |
|----|-----------|-----------|-----------|
| H  | -1.639217 | -2.372111 | -1.547138 |
| C  | 2.927443  | -1.645046 | 0.592120  |
| H  | 3.595133  | -2.469296 | 0.862340  |
| N  | 2.695350  | -0.686607 | 1.399649  |
| C  | 2.944521  | -0.863719 | 2.817541  |
| H  | 3.211513  | 0.087013  | 3.285632  |
| H  | 3.711368  | -1.612941 | 3.045265  |
| C  | 1.575471  | -1.368068 | 3.384853  |
| O  | 1.514747  | -1.858909 | 4.489385  |
| O  | 0.529341  | -1.254374 | 2.573696  |
| Pd | 0.682461  | 0.167662  | 1.111071  |
| C  | 2.124363  | -1.861009 | -0.648485 |
| B  | 0.707087  | -2.831911 | -0.474024 |
| B  | 0.266213  | -1.082236 | -0.624438 |
| C  | -1.232099 | -0.195238 | 0.383666  |
| C  | -1.902469 | 0.763891  | -0.406348 |
| C  | -1.983354 | -1.119572 | 1.146440  |
| C  | -3.292446 | 0.761875  | -0.467973 |
| H  | -1.333984 | 1.474544  | -0.994424 |
| C  | -3.369531 | -1.114678 | 1.073714  |
| H  | -1.477165 | -1.827190 | 1.791742  |
| C  | -4.030271 | -0.176479 | 0.267243  |
| H  | -3.808449 | 1.488096  | -1.085034 |
| H  | -3.961482 | -1.823067 | 1.642994  |
| C  | -5.526819 | -0.219206 | 0.237553  |
| O  | -6.193404 | -1.021490 | 0.859563  |
| O  | -6.050290 | 0.734578  | -0.556659 |
| C  | -7.486968 | 0.753580  | -0.630371 |
| H  | -7.734602 | 1.576195  | -1.300274 |
| H  | -7.861097 | -0.193470 | -1.026427 |
| H  | -7.917504 | 0.918333  | 0.360157  |
| C  | 1.595625  | 4.139117  | -0.418835 |
| C  | 0.913327  | 2.757633  | -0.642974 |
| O  | 0.330476  | 2.524118  | -1.685918 |
| O  | 1.088417  | 2.015561  | 0.404007  |
| F  | 2.920203  | 3.983831  | -0.223601 |
| F  | 1.417897  | 4.939593  | -1.473866 |
| F  | 1.082692  | 4.749530  | 0.667127  |
| B  | 2.931028  | -2.000271 | -2.161258 |
| C  | 1.831333  | -0.706685 | -1.699162 |
| H  | 4.077677  | -1.720898 | -2.163187 |
| F  | 2.462936  | 0.457144  | -1.472487 |

Zero-point correction= 0.373681  
 Thermal correction to Energy= 0.406217  
 Thermal correction to Enthalpy= 0.407162  
 Thermal correction to Gibbs Free Energy= 0.309509  
 Sum of electronic and zero-point Energies= -1863.459367  
 Sum of electronic and thermal Energies= -1863.426830  
 Sum of electronic and thermal Enthalpies= -1863.425886  
 Sum of electronic and thermal Free Energies= -1863.523539

Cartesian coordinates

|    |           |           |           |
|----|-----------|-----------|-----------|
| B  | -0.395505 | -2.349640 | -1.556230 |
| B  | 1.734500  | -1.285535 | -3.173704 |
| B  | 0.199016  | -0.867680 | -2.371529 |
| B  | 1.725959  | -0.410499 | -1.616316 |
| B  | 0.417044  | -2.478829 | -3.133229 |
| B  | 0.770277  | -3.666002 | -1.842035 |
| B  | 2.076342  | -3.025484 | -2.870852 |
| B  | 2.301982  | -3.226803 | -1.123780 |
| H  | 2.306631  | 0.601592  | -1.486397 |
| H  | 3.165210  | -3.861043 | -0.629243 |
| H  | 0.610699  | -3.229791 | 0.778443  |
| H  | 0.452564  | -4.805535 | -1.884117 |
| H  | 2.799515  | -3.616790 | -3.593390 |
| H  | -0.170244 | -2.767552 | -4.119846 |
| H  | 2.225139  | -0.749836 | -4.104358 |
| H  | -0.502649 | -0.048345 | -2.845391 |
| H  | -1.545772 | -2.579712 | -1.412275 |
| C  | 2.924583  | -1.377264 | 0.738609  |
| H  | 3.634875  | -2.160100 | 1.020193  |
| N  | 2.645736  | -0.411833 | 1.521672  |
| C  | 2.884186  | -0.540505 | 2.944167  |
| H  | 3.104681  | 0.432590  | 3.389487  |
| H  | 3.673817  | -1.254891 | 3.204405  |
| C  | 1.522992  | -1.083289 | 3.511962  |
| O  | 1.482662  | -1.542635 | 4.631545  |
| O  | 0.483541  | -1.036258 | 2.691792  |
| Pd | 0.585546  | 0.339179  | 1.179102  |
| C  | 2.759974  | -1.791259 | -1.939407 |
| C  | 2.072223  | -1.641072 | -0.468687 |
| B  | 0.785046  | -2.766131 | -0.293593 |
| B  | 0.350458  | -1.041177 | -0.598256 |
| C  | -1.253379 | -0.200566 | 0.380013  |
| C  | -1.947317 | 0.685747  | -0.471910 |

|   |           |           |           |
|---|-----------|-----------|-----------|
| C | -1.984970 | -1.120113 | 1.167301  |
| C | -3.334539 | 0.620747  | -0.564416 |
| H | -1.397444 | 1.390396  | -1.083884 |
| C | -3.367807 | -1.178574 | 1.066226  |
| H | -1.465994 | -1.772025 | 1.859414  |
| C | -4.049898 | -0.311109 | 0.199743  |
| H | -3.864884 | 1.293405  | -1.228352 |
| H | -3.942125 | -1.883068 | 1.658040  |
| C | -5.540931 | -0.420486 | 0.139101  |
| O | -6.189786 | -1.219507 | 0.784212  |
| O | -6.085742 | 0.470320  | -0.713358 |
| C | -7.519124 | 0.423474  | -0.818658 |
| H | -7.785353 | 1.198066  | -1.537098 |
| H | -7.844685 | -0.558271 | -1.170839 |
| H | -7.980090 | 0.621995  | 0.151876  |
| C | 1.407027  | 4.219008  | -0.627493 |
| C | 0.776424  | 2.801901  | -0.760190 |
| O | 0.933133  | 2.151276  | 0.346785  |
| O | 0.256595  | 2.460613  | -1.808661 |
| F | 1.192388  | 4.947342  | -1.727520 |
| F | 0.890973  | 4.880140  | 0.425632  |
| F | 2.739968  | 4.115787  | -0.443035 |
| F | 4.077268  | -1.517923 | -1.965759 |

### 33

Zero-point correction= 0.168517

Thermal correction to Energy= 0.177176

Thermal correction to Enthalpy= 0.178120

Thermal correction to Gibbs Free Energy= 0.136656

Sum of electronic and zero-point Energies= -431.160020

Sum of electronic and thermal Energies= -431.151362

Sum of electronic and thermal Enthalpies= -431.150417

Sum of electronic and thermal Free Energies= -431.191881

#### Cartesian coordinates

|   |           |           |           |
|---|-----------|-----------|-----------|
| B | 1.069474  | 1.458223  | 0.442350  |
| B | -0.419082 | -0.883417 | 1.272522  |
| B | -0.418897 | 0.910707  | 1.254113  |
| B | 1.095921  | 0.016050  | 1.504179  |
| B | 1.991698  | -0.000287 | -0.037089 |
| B | 1.069518  | -1.448352 | 0.473210  |
| B | 1.026810  | -0.906245 | -1.223101 |
| H | 1.388703  | -1.505054 | -2.176241 |

|   |           |           |           |
|---|-----------|-----------|-----------|
| H | 1.387860  | 1.459681  | -2.207416 |
| H | 3.174975  | -0.000470 | -0.091286 |
| H | 1.581448  | -2.470615 | 0.782855  |
| H | 1.630143  | 0.027017  | 2.561833  |
| H | -1.083801 | -1.452856 | 2.066318  |
| H | -1.084654 | 1.496710  | 2.034828  |
| H | 1.581047  | 2.487132  | 0.729657  |
| C | -0.413641 | -0.014555 | -1.342644 |
| B | 1.026043  | 0.879868  | -1.242600 |
| B | -0.451582 | 1.453295  | -0.440431 |
| B | -0.451344 | -1.462615 | -0.410174 |
| C | -1.222295 | 0.000546  | 0.074668  |
| H | -1.159338 | -2.326606 | -0.789025 |
| F | -2.565943 | -0.000241 | -0.022712 |
| H | -1.041039 | -0.023816 | -2.225420 |
| H | -1.159032 | 2.308963  | -0.838729 |

### 34-ts

Zero-point correction= 0.371349

Thermal correction to Energy= 0.404552

Thermal correction to Enthalpy= 0.405496

Thermal correction to Gibbs Free Energy= 0.306629

Sum of electronic and zero-point Energies= -2223.807982

Sum of electronic and thermal Energies= -2223.774780

Sum of electronic and thermal Enthalpies= -2223.773835

Sum of electronic and thermal Free Energies= -2223.872702

### Cartesian coordinates

|   |           |           |           |
|---|-----------|-----------|-----------|
| B | -0.703881 | -2.076702 | -1.664577 |
| B | 1.655583  | -1.503065 | -3.236674 |
| B | 0.295291  | -0.718976 | -2.316868 |
| B | 0.074780  | -2.286240 | -3.229727 |
| B | 0.125148  | -3.597777 | -2.009679 |
| B | 1.535383  | -3.278173 | -3.037501 |
| B | 1.741618  | -3.582161 | -1.294699 |
| H | 2.286256  | -4.487473 | -0.760530 |
| H | 0.107425  | -3.279978 | 0.625178  |
| H | -0.494752 | -4.604245 | -2.085929 |
| H | 1.920045  | -4.028470 | -3.869189 |
| H | -0.583898 | -2.323687 | -4.213390 |
| H | 2.133468  | -0.901115 | -4.132490 |
| H | -0.045293 | 0.327042  | -2.742205 |
| H | -1.879835 | -2.016132 | -1.550855 |
| C | 2.704322  | -1.923050 | 0.663023  |

|    |           |           |           |
|----|-----------|-----------|-----------|
| H  | 3.284254  | -2.802518 | 0.961254  |
| N  | 2.524864  | -0.946297 | 1.463095  |
| C  | 2.733383  | -1.134666 | 2.886003  |
| H  | 3.084891  | -0.209625 | 3.350864  |
| H  | 3.423138  | -1.950232 | 3.131662  |
| C  | 1.320672  | -1.498924 | 3.440569  |
| O  | 1.194641  | -1.980553 | 4.543714  |
| O  | 0.297017  | -1.280471 | 2.620348  |
| Pd | 0.580700  | 0.124630  | 1.161800  |
| C  | 1.934840  | -2.047944 | -0.609234 |
| B  | 0.376599  | -2.789217 | -0.416174 |
| B  | 0.070220  | -1.017124 | -0.555264 |
| C  | -1.370436 | -0.054130 | 0.474323  |
| C  | -1.971058 | 0.922320  | -0.348573 |
| C  | -2.180740 | -0.946872 | 1.213696  |
| C  | -3.356923 | 0.955688  | -0.478260 |
| H  | -1.355054 | 1.614186  | -0.911247 |
| C  | -3.560703 | -0.902305 | 1.074195  |
| H  | -1.725548 | -1.664142 | 1.885365  |
| C  | -4.154908 | 0.044955  | 0.226842  |
| H  | -3.821317 | 1.689518  | -1.126540 |
| H  | -4.199349 | -1.587701 | 1.620751  |
| C  | -5.649163 | 0.040814  | 0.122856  |
| O  | -6.366619 | -0.731485 | 0.725805  |
| O  | -6.106421 | 0.990851  | -0.714938 |
| C  | -7.536739 | 1.044277  | -0.862517 |
| H  | -7.728239 | 1.855484  | -1.563936 |
| H  | -7.915127 | 0.097066  | -1.254003 |
| H  | -8.012084 | 1.245163  | 0.100458  |
| C  | 1.879910  | 4.020317  | -0.279945 |
| C  | 0.956412  | 2.783217  | -0.481515 |
| O  | 0.258877  | 2.702500  | -1.475213 |
| O  | 1.121346  | 1.955840  | 0.502704  |
| F  | 3.169493  | 3.650663  | -0.445108 |
| F  | 1.602349  | 4.977661  | -1.168754 |
| F  | 1.751477  | 4.537426  | 0.955149  |
| B  | 2.720800  | -2.368899 | -2.109679 |
| C  | 1.872413  | -0.898856 | -1.683180 |
| H  | 3.899094  | -2.317175 | -2.126935 |
| Cl | 2.949981  | 0.479561  | -1.500540 |

### 35-ts

Zero-point correction= 0.371880

Thermal correction to Energy= 0.404921

Thermal correction to Enthalpy= 0.405865  
Thermal correction to Gibbs Free Energy= 0.306730  
Sum of electronic and zero-point Energies= -2223.818615  
Sum of electronic and thermal Energies= -2223.785574  
Sum of electronic and thermal Enthalpies= -2223.784630  
Sum of electronic and thermal Free Energies= -2223.883765

Cartesian coordinates

|    |           |           |           |
|----|-----------|-----------|-----------|
| B  | -0.369303 | -2.381769 | -1.422378 |
| B  | 1.806379  | -1.314085 | -2.975067 |
| B  | 0.221385  | -0.915212 | -2.267575 |
| B  | 1.692454  | -0.373877 | -1.455548 |
| B  | 0.526687  | -2.547446 | -2.947035 |
| B  | 0.853423  | -3.664501 | -1.590107 |
| B  | 2.186903  | -3.024889 | -2.581273 |
| B  | 2.333569  | -3.142610 | -0.815802 |
| H  | 2.215012  | 0.670680  | -1.343606 |
| H  | 3.173193  | -3.741568 | -0.243644 |
| H  | 0.550511  | -3.130658 | 0.994104  |
| H  | 0.579087  | -4.816174 | -1.596210 |
| H  | 2.954005  | -3.630683 | -3.243322 |
| H  | 0.001831  | -2.896240 | -3.949550 |
| H  | 2.312852  | -0.798128 | -3.907844 |
| H  | -0.474943 | -0.137251 | -2.814198 |
| H  | -1.517209 | -2.646344 | -1.326308 |
| C  | 2.781648  | -1.201652 | 1.007425  |
| H  | 3.492196  | -1.951565 | 1.366971  |
| N  | 2.429279  | -0.212627 | 1.729214  |
| C  | 2.587843  | -0.274231 | 3.167237  |
| H  | 2.750039  | 0.723848  | 3.581233  |
| H  | 3.384420  | -0.948417 | 3.502587  |
| C  | 1.215555  | -0.840416 | 3.680058  |
| O  | 1.123566  | -1.253255 | 4.814640  |
| O  | 0.225813  | -0.865366 | 2.799615  |
| Pd | 0.369172  | 0.450474  | 1.239013  |
| C  | 2.804854  | -1.727419 | -1.669864 |
| C  | 2.021294  | -1.539614 | -0.241464 |
| B  | 0.758745  | -2.698874 | -0.085877 |
| B  | 0.274919  | -1.007976 | -0.485470 |
| C  | -1.403988 | -0.194947 | 0.368312  |
| C  | -2.088622 | 0.631259  | -0.549462 |
| C  | -2.138288 | -1.115890 | 1.151765  |
| C  | -3.465357 | 0.503505  | -0.709780 |



|    |           |           |           |
|----|-----------|-----------|-----------|
| H  | -1.537742 | 1.338123  | -1.158223 |
| C  | -3.510215 | -1.237291 | 0.982722  |
| H  | -1.629366 | -1.720363 | 1.892462  |
| C  | -4.180880 | -0.431281 | 0.050515  |
| H  | -3.987264 | 1.129523  | -1.424126 |
| H  | -4.085295 | -1.944599 | 1.570412  |
| C  | -5.660731 | -0.607991 | -0.082908 |
| O  | -6.309323 | -1.408872 | 0.560155  |
| O  | -6.195599 | 0.223640  | -0.999004 |
| C  | -7.617897 | 0.108877  | -1.177400 |
| H  | -7.876929 | 0.840031  | -1.942480 |
| H  | -7.882121 | -0.900304 | -1.502345 |
| H  | -8.139005 | 0.327392  | -0.242227 |
| C  | 1.191805  | 4.265498  | -0.699674 |
| C  | 0.583385  | 2.835503  | -0.789506 |
| O  | 0.708796  | 2.236885  | 0.350487  |
| O  | 0.109433  | 2.439225  | -1.840224 |
| F  | 0.978692  | 4.951754  | -1.826756 |
| F  | 0.658913  | 4.957384  | 0.324663  |
| F  | 2.524415  | 4.184721  | -0.500225 |
| Cl | 4.518938  | -1.324163 | -1.680852 |

### 36

Zero-point correction= 0.166959

Thermal correction to Energy= 0.176027

Thermal correction to Enthalpy= 0.176972

Thermal correction to Gibbs Free Energy= 0.134241

Sum of electronic and zero-point Energies= -791.519580

Sum of electronic and thermal Energies= -791.510511

Sum of electronic and thermal Enthalpies= -791.509567

Sum of electronic and thermal Free Energies= -791.552297

### Cartesian coordinates

|   |           |           |           |
|---|-----------|-----------|-----------|
| B | 1.383079  | 1.454141  | 0.445365  |
| B | -0.098481 | -0.890203 | 1.273177  |
| B | -0.098598 | 0.901356  | 1.265666  |
| B | 1.419560  | 0.006636  | 1.497202  |
| B | 2.304017  | 0.000004  | -0.048788 |
| B | 1.383226  | -1.450072 | 0.458166  |
| B | 1.329539  | -0.897099 | -1.232901 |
| H | 1.680079  | -1.493187 | -2.192171 |
| H | 1.679519  | 1.474395  | -2.205077 |
| H | 3.487066  | -0.000114 | -0.112131 |

|    |           |           |           |
|----|-----------|-----------|-----------|
| H  | 1.893145  | -2.476604 | 0.757301  |
| H  | 1.958668  | 0.011089  | 2.552594  |
| H  | -0.747290 | -1.470573 | 2.071530  |
| H  | -0.748076 | 1.488177  | 2.058735  |
| H  | 1.892644  | 2.483443  | 0.735429  |
| C  | -0.111882 | -0.006051 | -1.339718 |
| B  | 1.329027  | 0.886307  | -1.240870 |
| B  | -0.145839 | 1.456587  | -0.427669 |
| B  | -0.145487 | -1.460464 | -0.415296 |
| C  | -0.928986 | 0.000394  | 0.080784  |
| H  | -0.837233 | -2.334690 | -0.798446 |
| H  | -0.837113 | 2.327521  | -0.819094 |
| H  | -0.732099 | -0.010095 | -2.227131 |
| Cl | -2.690842 | -0.000081 | -0.008129 |

### 37-ts

Zero-point correction= 0.370650

Thermal correction to Energy= 0.404171

Thermal correction to Enthalpy= 0.405115

Thermal correction to Gibbs Free Energy= 0.305082

Sum of electronic and zero-point Energies= -4335.020108

Sum of electronic and thermal Energies= -4334.986587

Sum of electronic and thermal Enthalpies= -4334.985643

Sum of electronic and thermal Free Energies= -4335.085676

### Cartesian coordinates

|   |           |           |           |
|---|-----------|-----------|-----------|
| B | -0.871983 | -2.057710 | -1.639946 |
| B | 1.573999  | -1.572322 | -3.104181 |
| B | 0.213768  | -0.735699 | -2.230473 |
| B | -0.037882 | -2.286703 | -3.171461 |
| B | -0.094044 | -3.608860 | -1.962937 |
| B | 1.368909  | -3.341914 | -2.928035 |
| B | 1.490116  | -3.666923 | -1.181863 |
| H | 1.971002  | -4.599521 | -0.633551 |
| H | -0.205577 | -3.312181 | 0.670269  |
| H | -0.753374 | -4.586965 | -2.072399 |
| H | 1.755593  | -4.101560 | -3.750370 |
| H | -0.655396 | -2.286139 | -4.182280 |
| H | 2.109406  | -0.988792 | -3.979186 |
| H | -0.064897 | 0.325525  | -2.663406 |
| H | -2.048206 | -1.946805 | -1.577044 |
| C | 2.432942  | -2.063224 | 0.832355  |

|    |           |           |           |
|----|-----------|-----------|-----------|
| H  | 2.965215  | -2.965821 | 1.149764  |
| N  | 2.251443  | -1.086507 | 1.632076  |
| C  | 2.390578  | -1.291785 | 3.061122  |
| H  | 2.754764  | -0.383038 | 3.548051  |
| H  | 3.039444  | -2.133188 | 3.330023  |
| C  | 0.943967  | -1.607688 | 3.552215  |
| O  | 0.752440  | -2.091961 | 4.644793  |
| O  | -0.035298 | -1.345642 | 2.691436  |
| Pd | 0.358010  | 0.063058  | 1.261106  |
| C  | 1.720871  | -2.146457 | -0.476148 |
| B  | 0.126314  | -2.821121 | -0.353038 |
| B  | -0.116563 | -1.040033 | -0.484162 |
| C  | -1.567495 | -0.043288 | 0.494938  |
| C  | -2.100755 | 0.953995  | -0.349053 |
| C  | -2.436157 | -0.919319 | 1.186324  |
| C  | -3.476768 | 1.021756  | -0.550291 |
| H  | -1.440566 | 1.633724  | -0.875163 |
| C  | -3.805586 | -0.839524 | 0.976554  |
| H  | -2.032519 | -1.652448 | 1.873535  |
| C  | -4.331911 | 0.126230  | 0.105442  |
| H  | -3.888988 | 1.770424  | -1.216614 |
| H  | -4.488002 | -1.512089 | 1.484837  |
| C  | -5.818168 | 0.157489  | -0.078525 |
| O  | -6.585043 | -0.597589 | 0.484003  |
| O  | -6.206877 | 1.117207  | -0.939557 |
| C  | -7.625188 | 1.202628  | -1.166488 |
| H  | -7.758377 | 2.011867  | -1.883510 |
| H  | -8.003732 | 0.261015  | -1.571025 |
| H  | -8.148094 | 1.423259  | -0.232898 |
| C  | 1.766554  | 3.982226  | -0.017266 |
| C  | 0.859115  | 2.749759  | -0.303778 |
| O  | 0.223930  | 2.694233  | -1.340041 |
| O  | 0.963896  | 1.897557  | 0.667294  |
| F  | 3.064447  | 3.626310  | -0.148170 |
| F  | 1.517021  | 4.972497  | -0.878026 |
| F  | 1.589249  | 4.449547  | 1.231237  |
| B  | 2.554923  | -2.491080 | -1.944254 |
| C  | 1.755973  | -0.991387 | -1.539539 |
| H  | 3.733826  | -2.501581 | -1.916308 |
| Br | 3.005814  | 0.451056  | -1.308924 |

**38-ts**

Zero-point correction= 0.371275

Thermal correction to Energy= 0.404633

Thermal correction to Enthalpy= 0.405577  
Thermal correction to Gibbs Free Energy= 0.304680  
Sum of electronic and zero-point Energies= -4335.031891  
Sum of electronic and thermal Energies= -4334.998534  
Sum of electronic and thermal Enthalpies= -4334.997590  
Sum of electronic and thermal Free Energies= -4335.098487

Cartesian coordinates

|    |           |           |           |
|----|-----------|-----------|-----------|
| B  | -0.363438 | -2.454071 | -1.166207 |
| B  | 1.828204  | -1.344007 | -2.665926 |
| B  | 0.174437  | -1.015956 | -2.093522 |
| B  | 1.544146  | -0.298932 | -1.241473 |
| B  | 0.643501  | -2.668394 | -2.612486 |
| B  | 0.960269  | -3.645150 | -1.148596 |
| B  | 2.306103  | -2.981613 | -2.106200 |
| B  | 2.342809  | -2.945301 | -0.332536 |
| H  | 1.970943  | 0.792290  | -1.186431 |
| H  | 3.180422  | -3.431843 | 0.339973  |
| H  | 0.443945  | -2.931134 | 1.358600  |
| H  | 0.774578  | -4.812137 | -1.074770 |
| H  | 3.156963  | -3.577861 | -2.666806 |
| H  | 0.216216  | -3.136351 | -3.612901 |
| H  | 2.354016  | -0.865782 | -3.608040 |
| H  | -0.538485 | -0.342377 | -2.746771 |
| H  | -1.492888 | -2.799622 | -1.120608 |
| C  | 2.519960  | -0.836099 | 1.342258  |
| H  | 3.257157  | -1.496171 | 1.808215  |
| N  | 2.049249  | 0.178279  | 1.952555  |
| C  | 2.117922  | 0.245942  | 3.397616  |
| H  | 2.180051  | 1.283696  | 3.733892  |
| H  | 2.938273  | -0.334668 | 3.835345  |
| C  | 0.760884  | -0.382731 | 3.876000  |
| O  | 0.623958  | -0.704013 | 5.035504  |
| O  | -0.162920 | -0.561892 | 2.943379  |
| Pd | -0.019705 | 0.631774  | 1.287065  |
| C  | 2.763084  | -1.571403 | -1.272183 |
| C  | 1.873674  | -1.333801 | 0.082414  |
| B  | 0.692140  | -2.574338 | 0.259778  |
| B  | 0.114536  | -0.964225 | -0.309820 |
| C  | -1.673303 | -0.227228 | 0.368635  |
| C  | -2.353849 | 0.465298  | -0.656311 |
| C  | -2.386424 | -1.142595 | 1.177764  |
| C  | -3.701367 | 0.210624  | -0.894067 |
| H  | -1.816937 | 1.164700  | -1.285874 |

|    |           |           |           |
|----|-----------|-----------|-----------|
| C  | -3.729128 | -1.391509 | 0.931156  |
| H  | -1.884561 | -1.644428 | 1.996025  |
| C  | -4.392942 | -0.719780 | -0.106583 |
| H  | -4.219230 | 0.732619  | -1.690195 |
| H  | -4.287074 | -2.097378 | 1.536845  |
| C  | -5.840278 | -1.032230 | -0.322097 |
| O  | -6.469206 | -1.829413 | 0.344658  |
| O  | -6.370007 | -0.329307 | -1.343163 |
| C  | -7.760532 | -0.582795 | -1.607693 |
| H  | -8.017243 | 0.050249  | -2.456449 |
| H  | -7.917311 | -1.636578 | -1.850039 |
| H  | -8.368360 | -0.325892 | -0.736789 |
| C  | 0.544235  | 4.365564  | -0.891324 |
| C  | 0.134577  | 2.863888  | -0.907040 |
| O  | 0.218850  | 2.376381  | 0.288182  |
| O  | -0.187468 | 2.328728  | -1.953866 |
| F  | 0.418018  | 4.911874  | -2.104662 |
| F  | -0.222767 | 5.062920  | -0.031781 |
| F  | 1.829940  | 4.493935  | -0.502396 |
| Br | 4.591606  | -0.985436 | -1.206869 |

### 39

Zero-point correction= 0.166411

Thermal correction to Energy= 0.175740

Thermal correction to Enthalpy= 0.176684

Thermal correction to Gibbs Free Energy= 0.132639

Sum of electronic and zero-point Energies= -2902.732317

Sum of electronic and thermal Energies= -2902.722988

Sum of electronic and thermal Enthalpies= -2902.722044

Sum of electronic and thermal Free Energies= -2902.766089

#### Cartesian coordinates

|   |          |           |           |
|---|----------|-----------|-----------|
| B | 1.884280 | 1.459101  | 0.425350  |
| B | 0.404940 | -0.874098 | 1.284789  |
| B | 0.405269 | 0.915696  | 1.256663  |
| B | 1.925371 | 0.024309  | 1.494065  |
| B | 2.804066 | -0.000607 | -0.054411 |
| B | 1.884563 | -1.444346 | 0.472250  |
| B | 1.825839 | -0.911501 | -1.224520 |
| H | 2.171388 | -1.519765 | -2.178017 |
| H | 2.170942 | 1.449023  | -2.225680 |
| H | 3.987025 | -0.001407 | -0.121845 |
| H | 2.393576 | -2.468185 | 0.782237  |

|    |           |           |           |
|----|-----------|-----------|-----------|
| H  | 2.466804  | 0.040868  | 2.548237  |
| H  | -0.237357 | -1.446902 | 2.093731  |
| H  | -0.238091 | 1.513497  | 2.046421  |
| H  | 2.392659  | 2.492850  | 0.701609  |
| C  | 0.383309  | -0.021917 | -1.336713 |
| B  | 1.825033  | 0.871220  | -1.253549 |
| B  | 0.350759  | 1.449770  | -0.442551 |
| B  | 0.351433  | -1.463835 | -0.396034 |
| C  | -0.427840 | 0.001523  | 0.086006  |
| H  | -0.336061 | -2.346468 | -0.766975 |
| H  | -0.335965 | 2.320068  | -0.842999 |
| H  | -0.238584 | -0.036161 | -2.222592 |
| Br | -2.349626 | -0.000103 | -0.003433 |

#### 40-ts

Zero-point correction= 0.410417

Thermal correction to Energy= 0.443606

Thermal correction to Enthalpy= 0.444550

Thermal correction to Gibbs Free Energy= 0.345828

Sum of electronic and zero-point Energies= -1803.516602

Sum of electronic and thermal Energies= -1803.483414

Sum of electronic and thermal Enthalpies= -1803.482470

Sum of electronic and thermal Free Energies= -1803.581192

#### Cartesian coordinates

|   |           |           |           |
|---|-----------|-----------|-----------|
| B | -0.387455 | -2.607301 | -1.299185 |
| B | 1.684398  | -1.933124 | -3.171153 |
| B | 0.244369  | -1.299250 | -2.335217 |
| B | 0.311287  | -3.009711 | -2.880390 |
| B | 0.694944  | -4.005545 | -1.454045 |
| B | 1.964450  | -3.613192 | -2.641821 |
| B | 2.306354  | -3.543196 | -0.902772 |
| H | 3.075104  | -4.190082 | -0.276558 |
| H | 0.725570  | -3.161646 | 1.079238  |
| H | 0.295665  | -5.108427 | -1.287625 |
| H | 2.480705  | -4.409987 | -3.350224 |
| H | -0.377422 | -3.377570 | -3.771349 |
| H | 2.011436  | -1.444008 | -4.196905 |
| H | -0.353337 | -0.429981 | -2.863954 |
| H | -1.539904 | -2.726116 | -1.065325 |
| C | 3.061447  | -1.438247 | 0.637951  |
| H | 3.752200  | -2.199446 | 1.015225  |
| N | 2.864885  | -0.351958 | 1.277453  |

|    |           |           |           |
|----|-----------|-----------|-----------|
| C  | 3.193829  | -0.300377 | 2.690527  |
| H  | 3.458692  | 0.715819  | 2.992433  |
| H  | 3.992330  | -0.990662 | 2.987336  |
| C  | 1.874720  | -0.741273 | 3.407561  |
| O  | 1.885530  | -1.036716 | 4.581396  |
| O  | 0.788277  | -0.807804 | 2.645600  |
| Pd | 0.782972  | 0.390083  | 0.994268  |
| C  | 2.201068  | -1.885182 | -0.501713 |
| B  | 0.864880  | -2.887315 | -0.061520 |
| B  | 0.422667  | -1.221496 | -0.568260 |
| C  | -1.084413 | -0.270612 | 0.358428  |
| C  | -1.848883 | 0.504324  | -0.542460 |
| C  | -1.749903 | -1.086842 | 1.305506  |
| C  | -3.237059 | 0.415664  | -0.534453 |
| H  | -1.355393 | 1.145080  | -1.263463 |
| C  | -3.134832 | -1.165579 | 1.307149  |
| H  | -1.176226 | -1.647621 | 2.032779  |
| C  | -3.885297 | -0.420588 | 0.385259  |
| H  | -3.821232 | 0.996690  | -1.238386 |
| H  | -3.657698 | -1.793516 | 2.020307  |
| C  | -5.375803 | -0.551208 | 0.436738  |
| O  | -5.966477 | -1.260813 | 1.225790  |
| O  | -5.988616 | 0.207519  | -0.492744 |
| C  | -7.425004 | 0.129299  | -0.500474 |
| H  | -7.749697 | 0.789772  | -1.303703 |
| H  | -7.750109 | -0.896746 | -0.688217 |
| H  | -7.830231 | 0.459361  | 0.459021  |
| C  | 0.931275  | 4.385283  | -0.730533 |
| C  | 0.582967  | 2.883356  | -0.944329 |
| O  | 0.022236  | 2.526831  | -1.968967 |
| O  | 0.994813  | 2.186841  | 0.062511  |
| F  | 2.261369  | 4.541888  | -0.572953 |
| F  | 0.543073  | 5.124918  | -1.773462 |
| F  | 0.321547  | 4.856501  | 0.374016  |
| B  | 2.939708  | -2.306801 | -1.984050 |
| C  | 1.828278  | -0.953078 | -1.778626 |
| H  | 4.078913  | -2.019018 | -2.105636 |
| C  | 2.484259  | 0.407611  | -1.980599 |
| H  | 1.748932  | 1.092189  | -2.401561 |
| H  | 2.859264  | 0.830537  | -1.050363 |
| H  | 3.313640  | 0.308007  | -2.682209 |

**41-ts**

Zero-point correction= 0.410079

Thermal correction to Energy= 0.443482  
Thermal correction to Enthalpy= 0.444426  
Thermal correction to Gibbs Free Energy= 0.344666  
Sum of electronic and zero-point Energies= -1803.525555  
Sum of electronic and thermal Energies= -1803.492152  
Sum of electronic and thermal Enthalpies= -1803.491207  
Sum of electronic and thermal Free Energies= -1803.590968

Cartesian coordinates

|    |           |           |           |
|----|-----------|-----------|-----------|
| B  | -0.542241 | -2.172168 | -1.706895 |
| B  | 1.683918  | -1.123144 | -3.189755 |
| B  | 0.162376  | -0.669889 | -2.391578 |
| B  | 1.703242  | -0.372582 | -1.577747 |
| B  | 0.298910  | -2.229483 | -3.270672 |
| B  | 0.556881  | -3.526829 | -2.068199 |
| B  | 1.921972  | -2.881066 | -3.013390 |
| B  | 2.095577  | -3.223774 | -1.290338 |
| H  | 2.310676  | 0.608822  | -1.356450 |
| H  | 2.884855  | -3.967202 | -0.820925 |
| H  | 0.362726  | -3.275668 | 0.574883  |
| H  | 0.178663  | -4.640903 | -2.203372 |
| H  | 2.607027  | -3.473249 | -3.774400 |
| H  | -0.281746 | -2.408442 | -4.287427 |
| H  | 2.206411  | -0.542810 | -4.077604 |
| H  | -0.474277 | 0.228695  | -2.812593 |
| H  | -1.707232 | -2.342993 | -1.599509 |
| C  | 2.746695  | -1.587271 | 0.741042  |
| H  | 3.368614  | -2.450167 | 1.000456  |
| N  | 2.520726  | -0.656254 | 1.581392  |
| C  | 2.703955  | -0.900988 | 2.996723  |
| H  | 2.992756  | 0.017827  | 3.512987  |
| H  | 3.424453  | -1.695208 | 3.225058  |
| C  | 1.291157  | -1.363147 | 3.502353  |
| O  | 1.188644  | -1.888185 | 4.589191  |
| O  | 0.277716  | -1.176687 | 2.671259  |
| Pd | 0.521812  | 0.262803  | 1.240559  |
| C  | 2.698836  | -1.766624 | -1.985620 |
| C  | 1.949186  | -1.694711 | -0.525381 |
| B  | 0.586524  | -2.746762 | -0.458229 |
| B  | 0.255001  | -0.986366 | -0.641913 |
| C  | -1.320185 | -0.138745 | 0.366365  |
| C  | -1.955233 | 0.848464  | -0.417929 |
| C  | -2.109693 | -1.086618 | 1.059739  |



|   |           |           |           |
|---|-----------|-----------|-----------|
| C | -3.341889 | 0.854184  | -0.541957 |
| H | -1.359354 | 1.579609  | -0.951457 |
| C | -3.490372 | -1.075466 | 0.925124  |
| H | -1.636830 | -1.816873 | 1.704840  |
| C | -4.114054 | -0.107515 | 0.122831  |
| H | -3.827356 | 1.605345  | -1.153992 |
| H | -4.108010 | -1.802248 | 1.441584  |
| C | -5.606116 | -0.145623 | 0.022166  |
| O | -6.304279 | -0.967642 | 0.581407  |
| O | -6.093058 | 0.838345  | -0.760810 |
| C | -7.523854 | 0.861245  | -0.899380 |
| H | -7.741647 | 1.707801  | -1.549782 |
| H | -7.879728 | -0.070302 | -1.346132 |
| H | -8.000388 | 0.990326  | 0.075378  |
| C | 1.921092  | 4.019041  | -0.457181 |
| C | 0.953255  | 2.805586  | -0.562560 |
| O | 1.068076  | 2.064394  | 0.491181  |
| O | 0.278243  | 2.658879  | -1.566801 |
| F | 1.661656  | 4.932202  | -1.398123 |
| F | 1.849667  | 4.618654  | 0.744204  |
| F | 3.191166  | 3.584565  | -0.630745 |
| C | 4.203770  | -1.539302 | -2.020751 |
| H | 4.745089  | -2.438576 | -1.719392 |
| H | 4.498492  | -1.283826 | -3.039883 |
| H | 4.493157  | -0.711487 | -1.369121 |

## 42

Zero-point correction= 0.204705

Thermal correction to Energy= 0.213458

Thermal correction to Enthalpy= 0.214402

Thermal correction to Gibbs Free Energy= 0.172813

Sum of electronic and zero-point Energies= -371.225677

Sum of electronic and thermal Energies= -371.216925

Sum of electronic and thermal Enthalpies= -371.215981

Sum of electronic and thermal Free Energies= -371.257570

### Cartesian coordinates

|   |           |           |           |
|---|-----------|-----------|-----------|
| B | 1.111967  | 1.431787  | 0.512348  |
| B | -0.382197 | -0.933685 | 1.221993  |
| B | -0.382870 | 0.844992  | 1.284478  |
| B | 1.134854  | -0.056275 | 1.505278  |
| B | 2.036092  | -0.003436 | -0.031517 |
| B | 1.105350  | -1.468991 | 0.406661  |

|   |           |           |           |
|---|-----------|-----------|-----------|
| B | 1.067495  | -0.847952 | -1.259339 |
| H | 1.427088  | -1.403787 | -2.239891 |
| H | 1.437506  | 1.554156  | -2.133488 |
| H | 3.220198  | -0.004346 | -0.085864 |
| H | 1.609446  | -2.509407 | 0.667547  |
| H | 1.666402  | -0.094560 | 2.564399  |
| H | -1.034952 | -1.547401 | 1.995519  |
| H | -1.031004 | 1.406248  | 2.100715  |
| H | 1.621818  | 2.447201  | 0.849496  |
| C | -0.373861 | 0.051277  | -1.336858 |
| B | 1.073481  | 0.932595  | -1.194920 |
| B | -0.407428 | 1.466416  | -0.375580 |
| B | -0.418171 | -1.430399 | -0.477653 |
| C | -1.225274 | 0.001287  | 0.064102  |
| H | -1.098419 | -2.295228 | -0.907627 |
| H | -1.084188 | 2.363233  | -0.740154 |
| H | -0.968361 | 0.085738  | -2.241463 |
| C | -2.746511 | 0.002755  | -0.013828 |
| H | -3.152894 | -0.354404 | 0.934219  |
| H | -3.131090 | 1.007706  | -0.197671 |
| H | -3.100535 | -0.662321 | -0.804978 |

### 43-ts

Zero-point correction= 0.467350

Thermal correction to Energy= 0.503275

Thermal correction to Enthalpy= 0.504219

Thermal correction to Gibbs Free Energy= 0.399811

Sum of electronic and zero-point Energies= -1882.079697

Sum of electronic and thermal Energies= -1882.043771

Sum of electronic and thermal Enthalpies= -1882.042827

Sum of electronic and thermal Free Energies= -1882.147235

### Cartesian coordinates

|   |           |           |           |
|---|-----------|-----------|-----------|
| B | -0.908160 | -2.394629 | -1.382174 |
| B | 1.425630  | -2.070408 | -3.033565 |
| B | 0.064521  | -1.186330 | -2.272253 |
| B | -0.151290 | -2.864123 | -2.908001 |
| B | -0.098481 | -3.964917 | -1.506701 |
| B | 1.319778  | -3.788685 | -2.558978 |
| B | 1.510690  | -3.826028 | -0.794993 |
| H | 2.084051  | -4.625074 | -0.135579 |
| H | -0.130861 | -3.223330 | 1.056588  |
| H | -0.711862 | -4.975141 | -1.423693 |

|    |           |           |           |
|----|-----------|-----------|-----------|
| H  | 1.737949  | -4.650734 | -3.255890 |
| H  | -0.811860 | -3.058346 | -3.872226 |
| H  | 1.908502  | -1.655600 | -4.028259 |
| H  | -0.350127 | -0.231460 | -2.826404 |
| H  | -2.080009 | -2.292606 | -1.268268 |
| C  | 2.495988  | -1.952168 | 0.900238  |
| H  | 3.021138  | -2.834901 | 1.280400  |
| N  | 2.407983  | -0.888529 | 1.598375  |
| C  | 2.614909  | -0.965912 | 3.032543  |
| H  | 3.016029  | -0.025206 | 3.418139  |
| H  | 3.260158  | -1.794893 | 3.346887  |
| C  | 1.186177  | -1.210147 | 3.618341  |
| O  | 1.045735  | -1.568220 | 4.766152  |
| O  | 0.170282  | -1.042774 | 2.777395  |
| Pd | 0.503225  | 0.223104  | 1.215043  |
| C  | 1.688639  | -2.183532 | -0.339563 |
| B  | 0.149933  | -2.939610 | -0.055095 |
| B  | 0.035321  | -1.216479 | -0.492368 |
| C  | -1.375651 | -0.107064 | 0.387160  |
| C  | -1.939106 | 0.818641  | -0.519913 |
| C  | -2.235090 | -0.873517 | 1.214723  |
| C  | -3.321275 | 0.918643  | -0.646373 |
| H  | -1.298290 | 1.449120  | -1.122883 |
| C  | -3.610585 | -0.760501 | 1.085588  |
| H  | -1.816759 | -1.548519 | 1.950507  |
| C  | -4.161270 | 0.127599  | 0.148455  |
| H  | -3.750294 | 1.616022  | -1.356216 |
| H  | -4.279963 | -1.347171 | 1.705269  |
| C  | -5.653927 | 0.197369  | 0.052692  |
| O  | -6.407793 | -0.462927 | 0.738800  |
| O  | -6.066578 | 1.075018  | -0.882246 |
| C  | -7.492809 | 1.191725  | -1.029084 |
| H  | -7.646500 | 1.926573  | -1.818524 |
| H  | -7.927677 | 0.228758  | -1.307108 |
| H  | -7.946423 | 1.528515  | -0.093894 |
| C  | 1.889813  | 4.094753  | -0.266586 |
| C  | 0.878513  | 2.922324  | -0.431139 |
| O  | 0.033093  | 2.981390  | -1.305641 |
| O  | 1.168356  | 1.977742  | 0.407262  |
| F  | 3.088101  | 3.716284  | -0.776458 |
| F  | 1.484737  | 5.183955  | -0.924177 |
| F  | 2.077777  | 4.421870  | 1.023221  |
| B  | 2.467971  | -2.723399 | -1.771149 |
| C  | 1.656155  | -1.168166 | -1.607301 |

|   |          |           |           |
|---|----------|-----------|-----------|
| H | 3.643627 | -2.732030 | -1.780488 |
| C | 2.567875 | 0.094244  | -1.631491 |
| H | 2.335792 | 0.662520  | -0.734245 |
| C | 2.267508 | 1.008698  | -2.834613 |
| H | 1.219515 | 1.300770  | -2.888030 |
| H | 2.854457 | 1.923985  | -2.721512 |
| H | 2.552562 | 0.538122  | -3.779391 |
| C | 4.080685 | -0.190082 | -1.588671 |
| H | 4.431871 | -0.685772 | -2.498152 |
| H | 4.597359 | 0.770934  | -1.509367 |
| H | 4.384262 | -0.792858 | -0.728954 |

#### 44-ts

Zero-point correction= 0.467189

Thermal correction to Energy= 0.503151

Thermal correction to Enthalpy= 0.504095

Thermal correction to Gibbs Free Energy= 0.398616

Sum of electronic and zero-point Energies= -1882.094872

Sum of electronic and thermal Energies= -1882.058910

Sum of electronic and thermal Enthalpies= -1882.057966

Sum of electronic and thermal Free Energies= -1882.163446

#### Cartesian coordinates

|   |           |           |           |
|---|-----------|-----------|-----------|
| B | -0.359322 | -2.399386 | -1.298178 |
| B | 1.872988  | -1.303965 | -2.729887 |
| B | 0.238593  | -0.937661 | -2.144513 |
| B | 1.646401  | -0.331827 | -1.257753 |
| B | 0.645279  | -2.577632 | -2.749319 |
| B | 0.922911  | -3.635230 | -1.341408 |
| B | 2.300674  | -2.964390 | -2.253532 |
| B | 2.322250  | -3.020377 | -0.488909 |
| H | 2.093737  | 0.748755  | -1.140320 |
| H | 3.098707  | -3.605014 | 0.177181  |
| H | 0.422122  | -3.039263 | 1.197063  |
| H | 0.695476  | -4.797458 | -1.327372 |
| H | 3.107636  | -3.583335 | -2.856787 |
| H | 0.202929  | -2.976686 | -3.773208 |
| H | 2.373329  | -0.801349 | -3.671245 |
| H | -0.444180 | -0.199738 | -2.760282 |
| H | -1.501501 | -2.703660 | -1.268333 |
| C | 2.555543  | -1.041104 | 1.308234  |
| H | 3.225062  | -1.777481 | 1.764455  |
| N | 2.150273  | -0.023619 | 1.960712  |

|    |           |           |           |
|----|-----------|-----------|-----------|
| C  | 2.208166  | -0.036122 | 3.407893  |
| H  | 2.327791  | 0.977262  | 3.798512  |
| H  | 2.990146  | -0.685254 | 3.819419  |
| C  | 0.815894  | -0.609553 | 3.850916  |
| O  | 0.656628  | -0.977302 | 4.994197  |
| O  | -0.109686 | -0.692438 | 2.908812  |
| Pd | 0.102297  | 0.564546  | 1.308747  |
| C  | 2.848619  | -1.617166 | -1.359590 |
| C  | 1.919298  | -1.434991 | 0.008223  |
| B  | 0.685996  | -2.631185 | 0.119223  |
| B  | 0.181524  | -0.976507 | -0.368061 |
| C  | -1.575089 | -0.196818 | 0.349632  |
| C  | -2.231665 | 0.572080  | -0.636508 |
| C  | -2.321346 | -1.126593 | 1.111251  |
| C  | -3.587519 | 0.377714  | -0.883982 |
| H  | -1.672131 | 1.286099  | -1.229117 |
| C  | -3.671716 | -1.315641 | 0.854306  |
| H  | -1.838150 | -1.687537 | 1.901493  |
| C  | -4.311832 | -0.567552 | -0.145280 |
| H  | -4.086159 | 0.959458  | -1.650471 |
| H  | -4.253736 | -2.032533 | 1.423238  |
| C  | -5.769285 | -0.815811 | -0.373014 |
| O  | -6.426236 | -1.626347 | 0.249364  |
| O  | -6.275730 | -0.037060 | -1.350496 |
| C  | -7.674646 | -0.225119 | -1.623048 |
| H  | -7.912550 | 0.470703  | -2.427038 |
| H  | -7.868703 | -1.254629 | -1.933574 |
| H  | -8.270617 | -0.005836 | -0.733834 |
| C  | 1.020452  | 4.299569  | -0.736467 |
| C  | 0.385335  | 2.879915  | -0.795648 |
| O  | 0.456348  | 2.323114  | 0.369299  |
| O  | -0.050000 | 2.453391  | -1.851179 |
| F  | 0.823862  | 4.966238  | -1.878622 |
| F  | 0.508525  | 5.028529  | 0.272080  |
| F  | 2.353121  | 4.191523  | -0.537021 |
| C  | 4.328932  | -1.148543 | -1.256172 |
| H  | 4.365380  | -0.468304 | -0.395671 |
| C  | 5.321549  | -2.294842 | -0.994935 |
| H  | 6.334799  | -1.885147 | -0.953381 |
| H  | 5.134947  | -2.812328 | -0.051916 |
| H  | 5.292057  | -3.035180 | -1.799452 |
| C  | 4.778416  | -0.337563 | -2.482873 |
| H  | 5.792174  | 0.033354  | -2.306139 |
| H  | 4.799603  | -0.955322 | -3.385129 |

|   |          |          |           |
|---|----------|----------|-----------|
| H | 4.132985 | 0.522781 | -2.669280 |
|---|----------|----------|-----------|

#### 45

Zero-point correction= 0.262325

Thermal correction to Energy= 0.274307

Thermal correction to Enthalpy= 0.275251

Thermal correction to Gibbs Free Energy= 0.226201

Sum of electronic and zero-point Energies= -449.794380

Sum of electronic and thermal Energies= -449.782399

Sum of electronic and thermal Enthalpies= -449.781455

Sum of electronic and thermal Free Energies= -449.830505

#### Cartesian coordinates

|   |           |           |           |
|---|-----------|-----------|-----------|
| B | 1.641037  | 1.450369  | 0.548296  |
| B | 0.071341  | -0.886723 | 1.177359  |
| B | 0.071565  | 0.890797  | 1.174443  |
| B | 1.551824  | 0.002595  | 1.593837  |
| B | 2.619962  | 0.000127  | 0.168978  |
| B | 1.640771  | -1.448701 | 0.553181  |
| B | 1.795147  | -0.890735 | -1.127460 |
| H | 2.257037  | -1.488564 | -2.038067 |
| H | 2.257263  | 1.481524  | -2.042972 |
| H | 3.802705  | 0.000170  | 0.249385  |
| H | 2.107439  | -2.478888 | 0.908101  |
| H | 1.959924  | 0.004396  | 2.707149  |
| H | -0.635620 | -1.485456 | 1.911196  |
| H | -0.635279 | 1.492086  | 1.906266  |
| H | 2.107903  | 2.481674  | 0.899701  |
| C | 0.375519  | -0.002361 | -1.398796 |
| B | 1.795266  | 0.886758  | -1.130415 |
| B | 0.226623  | 1.439598  | -0.505359 |
| B | 0.226485  | -1.441277 | -0.500577 |
| C | -0.655433 | -0.000015 | -0.095360 |
| H | -0.371105 | -2.336215 | -0.983804 |
| H | -0.370856 | 2.332965  | -0.991681 |
| H | -0.110981 | -0.003881 | -2.366222 |
| C | -2.182632 | -0.000055 | -0.398934 |
| H | -2.262891 | -0.000003 | -1.493753 |
| C | -2.907520 | 1.254206  | 0.119331  |
| H | -3.947831 | 1.228400  | -0.218745 |
| H | -2.912934 | 1.282902  | 1.212368  |
| H | -2.457913 | 2.179959  | -0.243761 |

|   |           |           |           |
|---|-----------|-----------|-----------|
| C | -2.907797 | -1.254140 | 0.119338  |
| H | -2.912415 | -1.283282 | 1.212366  |
| H | -3.948349 | -1.227630 | -0.217943 |
| H | -2.459016 | -2.180004 | -0.244473 |

#### 46-ts

Zero-point correction= 0.495241

Thermal correction to Energy= 0.532240

Thermal correction to Enthalpy= 0.533184

Thermal correction to Gibbs Free Energy= 0.426961

Sum of electronic and zero-point Energies= -1921.356829

Sum of electronic and thermal Energies= -1921.319830

Sum of electronic and thermal Enthalpies= -1921.318886

Sum of electronic and thermal Free Energies= -1921.425110

#### Cartesian coordinates

|    |           |           |           |
|----|-----------|-----------|-----------|
| B  | -0.529134 | -2.739619 | -0.669653 |
| B  | 1.724229  | -2.684040 | -2.448977 |
| B  | 0.318404  | -1.691909 | -1.879042 |
| B  | 0.252381  | -3.531375 | -2.008292 |
| B  | 0.467260  | -4.155864 | -0.345479 |
| B  | 1.813410  | -4.188350 | -1.487736 |
| B  | 2.070076  | -3.645683 | 0.183578  |
| H  | 2.716551  | -4.157033 | 1.034401  |
| H  | 0.448216  | -2.710097 | 1.856620  |
| H  | -0.033644 | -5.141217 | 0.082281  |
| H  | 2.273923  | -5.188270 | -1.926166 |
| H  | -0.402853 | -4.063207 | -2.840613 |
| H  | 2.056226  | -2.580475 | -3.576163 |
| H  | -0.200678 | -1.049199 | -2.723859 |
| H  | -1.706732 | -2.749597 | -0.552489 |
| C  | 2.801731  | -1.266772 | 1.224553  |
| H  | 3.545443  | -1.864971 | 1.761061  |
| N  | 2.381308  | -0.165403 | 1.713368  |
| C  | 2.543211  | 0.157361  | 3.117066  |
| H  | 2.738581  | 1.226049  | 3.243809  |
| H  | 3.323596  | -0.424161 | 3.620355  |
| C  | 1.164830  | -0.188175 | 3.760627  |
| O  | 1.054977  | -0.324461 | 4.958106  |
| O  | 0.150810  | -0.345961 | 2.915403  |
| Pd | 0.377971  | 0.472659  | 1.070498  |
| C  | 2.107021  | -1.942027 | 0.081124  |

|   |           |           |           |
|---|-----------|-----------|-----------|
| B | 0.636425  | -2.690697 | 0.689380  |
| B | 0.035112  | -1.218267 | -0.142809 |
| C | -1.502887 | -0.117355 | 0.391989  |
| C | -2.102494 | 0.487020  | -0.733356 |
| C | -2.314022 | -0.749093 | 1.360320  |
| C | -3.474288 | 0.379827  | -0.931758 |
| H | -1.490402 | 1.014956  | -1.453590 |
| C | -3.685500 | -0.840396 | 1.161305  |
| H | -1.860895 | -1.168252 | 2.251377  |
| C | -4.269161 | -0.286704 | 0.012809  |
| H | -3.936015 | 0.817973  | -1.808741 |
| H | -4.324644 | -1.333039 | 1.885937  |
| C | -5.751691 | -0.424727 | -0.147067 |
| O | -6.470337 | -0.983428 | 0.656460  |
| O | -6.198550 | 0.140360  | -1.285931 |
| C | -7.617044 | 0.041065  | -1.505100 |
| H | -7.801287 | 0.535313  | -2.458331 |
| H | -7.923818 | -1.006657 | -1.547062 |
| H | -8.163199 | 0.538278  | -0.699993 |
| C | 0.845805  | 4.104284  | -0.883842 |
| C | 0.679954  | 2.918801  | 0.091215  |
| O | 0.745244  | 3.065994  | 1.309531  |
| O | 0.513058  | 1.785607  | -0.514720 |
| F | -0.149396 | 4.117686  | -1.789508 |
| F | 0.850735  | 5.269912  | -0.235388 |
| F | 2.013847  | 3.977556  | -1.549068 |
| B | 2.900543  | -2.841061 | -1.127739 |
| C | 1.987201  | -1.390259 | -1.420906 |
| H | 4.075154  | -2.789464 | -1.198472 |
| C | 2.836394  | -0.183816 | -2.055584 |
| C | 4.031776  | -0.700917 | -2.907311 |
| H | 3.731646  | -1.409524 | -3.678802 |
| H | 4.478645  | 0.163503  | -3.407286 |
| H | 4.810952  | -1.160396 | -2.296825 |
| C | 1.939869  | 0.621250  | -3.024173 |
| H | 1.069140  | 1.043146  | -2.529051 |
| H | 2.526572  | 1.450635  | -3.430710 |
| H | 1.610297  | 0.003926  | -3.863873 |
| C | 3.474575  | 0.765626  | -1.023732 |
| H | 2.752372  | 1.234588  | -0.365257 |
| H | 4.227493  | 0.254633  | -0.416104 |
| H | 3.990034  | 1.561152  | -1.569270 |



**47-ts**

Zero-point correction= 0.495719

Thermal correction to Energy= 0.532755

Thermal correction to Enthalpy= 0.533699

Thermal correction to Gibbs Free Energy= 0.427293

Sum of electronic and zero-point Energies= -1921.373158

Sum of electronic and thermal Energies= -1921.336123

Sum of electronic and thermal Enthalpies= -1921.335178

Sum of electronic and thermal Free Energies= -1921.441584

## Cartesian coordinates

|    |           |           |           |
|----|-----------|-----------|-----------|
| B  | -0.551053 | -2.291321 | -1.347886 |
| B  | 1.727636  | -1.180714 | -2.695749 |
| B  | 0.088331  | -0.809497 | -2.127719 |
| B  | 1.488825  | -0.263453 | -1.193376 |
| B  | 0.475955  | -2.433872 | -2.784973 |
| B  | 0.710330  | -3.541319 | -1.408423 |
| B  | 2.111116  | -2.870057 | -2.275369 |
| B  | 2.108831  | -2.980510 | -0.517089 |
| H  | 1.912700  | 0.816041  | -1.044223 |
| H  | 2.849353  | -3.615844 | 0.140942  |
| H  | 0.188053  | -3.019001 | 1.138174  |
| H  | 0.468153  | -4.700441 | -1.437036 |
| H  | 2.902169  | -3.500270 | -2.887103 |
| H  | 0.046505  | -2.786987 | -3.831105 |
| H  | 2.231024  | -0.646406 | -3.617275 |
| H  | -0.562926 | -0.032338 | -2.731296 |
| H  | -1.697418 | -2.579872 | -1.345697 |
| C  | 2.310814  | -1.107693 | 1.388308  |
| H  | 2.951977  | -1.879176 | 1.825331  |
| N  | 1.872147  | -0.142065 | 2.094887  |
| C  | 1.859445  | -0.248410 | 3.539342  |
| H  | 1.994497  | 0.734670  | 3.997561  |
| H  | 2.601478  | -0.947503 | 3.942786  |
| C  | 0.431756  | -0.793092 | 3.887131  |
| O  | 0.210005  | -1.235167 | 4.993011  |
| O  | -0.461386 | -0.765382 | 2.909819  |
| Pd | -0.107227 | 0.540951  | 1.383570  |
| C  | 2.697921  | -1.559353 | -1.336876 |
| C  | 1.743397  | -1.408702 | 0.031088  |
| B  | 0.469592  | -2.579727 | 0.076849  |
| B  | -0.018985 | -0.907440 | -0.362698 |
| C  | -1.774173 | -0.116487 | 0.321352  |

|   |           |           |           |
|---|-----------|-----------|-----------|
| C | -2.380150 | 0.737353  | -0.626290 |
| C | -2.568976 | -1.073574 | 0.996750  |
| C | -3.733279 | 0.599032  | -0.924669 |
| H | -1.783945 | 1.480370  | -1.143218 |
| C | -3.914612 | -1.207057 | 0.688386  |
| H | -2.126873 | -1.701760 | 1.759751  |
| C | -4.503758 | -0.374522 | -0.275537 |
| H | -4.193581 | 1.247021  | -1.661419 |
| H | -4.532038 | -1.945385 | 1.188386  |
| C | -5.959004 | -0.567695 | -0.563168 |
| O | -6.654360 | -1.403384 | -0.020846 |
| O | -6.416515 | 0.291766  | -1.496195 |
| C | -7.810003 | 0.158160  | -1.822973 |
| H | -8.008338 | 0.918803  | -2.577455 |
| H | -8.016281 | -0.839724 | -2.217669 |
| H | -8.428362 | 0.322364  | -0.937180 |
| C | 1.463273  | 4.066854  | -0.623922 |
| C | 0.429082  | 2.904787  | -0.628532 |
| O | 0.471799  | 2.276413  | 0.500635  |
| O | -0.214170 | 2.685871  | -1.640321 |
| F | 1.235287  | 4.931139  | -1.617369 |
| F | 1.468457  | 4.746486  | 0.535042  |
| F | 2.703372  | 3.542713  | -0.801072 |
| C | 4.239014  | -1.191334 | -1.293654 |
| C | 5.050025  | -2.269712 | -0.540574 |
| H | 6.110473  | -2.007711 | -0.594673 |
| H | 4.788212  | -2.336068 | 0.518798  |
| H | 4.926990  | -3.259853 | -0.985966 |
| C | 4.790601  | -1.124620 | -2.738586 |
| H | 5.870064  | -0.955419 | -2.684902 |
| H | 4.623582  | -2.052380 | -3.289734 |
| H | 4.353357  | -0.301269 | -3.305017 |
| C | 4.515753  | 0.179574  | -0.636192 |
| H | 4.059267  | 1.006360  | -1.182554 |
| H | 4.179138  | 0.234033  | 0.401728  |
| H | 5.597542  | 0.343004  | -0.632700 |

#### 48

Zero-point correction= 0.290672

Thermal correction to Energy= 0.303687

Thermal correction to Enthalpy= 0.304631

Thermal correction to Gibbs Free Energy= 0.254229

Sum of electronic and zero-point Energies= -489.077372

Sum of electronic and thermal Energies= -489.064357

Sum of electronic and thermal Enthalpies= -489.063413

Sum of electronic and thermal Free Energies= -489.113816

Cartesian coordinates

|   |           |           |           |
|---|-----------|-----------|-----------|
| B | 1.901794  | 1.447784  | 0.464264  |
| B | 0.418396  | -0.891461 | 1.259549  |
| B | 0.418304  | 0.882894  | 1.265518  |
| B | 1.936498  | -0.005002 | 1.503391  |
| B | 2.832519  | 0.000168  | -0.032376 |
| B | 1.901896  | -1.450646 | 0.454416  |
| B | 1.861981  | -0.885322 | -1.226328 |
| H | 2.213515  | -1.478214 | -2.188233 |
| H | 2.214110  | 1.492748  | -2.178002 |
| H | 4.016593  | 0.000342  | -0.090272 |
| H | 2.403509  | -2.483440 | 0.749042  |
| H | 2.466544  | -0.008605 | 2.564218  |
| H | -0.183696 | -1.497375 | 2.074275  |
| H | -0.183512 | 1.483175  | 2.084580  |
| H | 2.403532  | 2.478508  | 0.765864  |
| C | 0.423950  | 0.004393  | -1.331502 |
| B | 1.862211  | 0.893439  | -1.220210 |
| B | 0.370670  | 1.438633  | -0.417522 |
| B | 0.370915  | -1.435739 | -0.426853 |
| C | -0.466570 | -0.000116 | 0.081731  |
| H | -0.273378 | -2.333350 | -0.841773 |
| C | -2.044946 | -0.000053 | 0.003755  |
| C | -2.628747 | -1.248471 | 0.702174  |
| H | -2.394249 | -1.261303 | 1.768350  |
| H | -3.718233 | -1.230302 | 0.600406  |
| H | -2.266184 | -2.179192 | 0.260026  |
| C | -2.628944 | 1.244705  | 0.708644  |
| H | -2.266813 | 2.177895  | 0.271287  |
| H | -3.718504 | 1.226842  | 0.607112  |
| H | -2.394151 | 1.252149  | 1.774841  |
| C | -2.529223 | 0.003784  | -1.462196 |
| H | -2.200507 | 0.896757  | -2.003041 |
| H | -2.200696 | -0.886209 | -2.008117 |
| H | -3.622799 | 0.003963  | -1.472924 |
| H | -0.150346 | 0.007730  | -2.245582 |
| H | -0.273779 | 2.338687  | -0.826942 |

**49-ts**

Zero-point correction= 0.382527

Thermal correction to Energy= 0.414042

Thermal correction to Enthalpy= 0.414986

Thermal correction to Gibbs Free Energy= 0.319279

Sum of electronic and zero-point Energies= -1764.246071

Sum of electronic and thermal Energies= -1764.214556

Sum of electronic and thermal Enthalpies= -1764.213612

Sum of electronic and thermal Free Energies= -1764.309319

## Cartesian coordinates

|    |           |           |           |
|----|-----------|-----------|-----------|
| B  | -0.510342 | -2.027977 | -1.933905 |
| B  | 1.724448  | -0.893330 | -3.364244 |
| B  | 0.243972  | -0.492590 | -2.454222 |
| B  | 0.291770  | -1.931300 | -3.522487 |
| B  | 0.536038  | -3.356634 | -2.479317 |
| B  | 1.904349  | -2.670483 | -3.401339 |
| B  | 2.122085  | -3.196688 | -1.717288 |
| H  | 2.815400  | -4.060616 | -1.299920 |
| H  | 0.409302  | -3.390275 | 0.193342  |
| H  | 0.088898  | -4.427700 | -2.716989 |
| H  | 2.431930  | -3.230031 | -4.302016 |
| H  | -0.344122 | -1.954588 | -4.521647 |
| H  | 2.141028  | -0.110536 | -4.145460 |
| H  | -0.278739 | 0.538668  | -2.693747 |
| H  | -1.679914 | -2.153090 | -1.814601 |
| C  | 2.854708  | -1.703678 | 0.451255  |
| H  | 3.493573  | -2.571284 | 0.642151  |
| N  | 2.677372  | -0.803801 | 1.335788  |
| C  | 2.952359  | -1.092741 | 2.730436  |
| H  | 3.284141  | -0.191725 | 3.252271  |
| H  | 3.685279  | -1.893412 | 2.880939  |
| C  | 1.576176  | -1.561778 | 3.308645  |
| O  | 1.522664  | -2.116618 | 4.383114  |
| O  | 0.515456  | -1.340369 | 2.540944  |
| Pd | 0.706945  | 0.116990  | 1.135660  |
| C  | 2.046051  | -1.772496 | -0.806196 |
| B  | 0.641525  | -2.766574 | -0.783869 |
| B  | 0.298885  | -1.000149 | -0.756364 |
| C  | -1.193920 | -0.196165 | 0.339680  |
| C  | -1.852059 | 0.879832  | -0.294087 |
| C  | -1.958763 | -1.203815 | 0.969444  |
| C  | -3.240356 | 0.908536  | -0.355798 |

|   |           |           |           |
|---|-----------|-----------|-----------|
| H | -1.272785 | 1.683640  | -0.730382 |
| C | -3.345224 | -1.166928 | 0.905897  |
| H | -1.460832 | -2.004008 | 1.504099  |
| C | -3.991547 | -0.117178 | 0.237563  |
| H | -3.747904 | 1.728065  | -0.850857 |
| H | -3.947960 | -1.937466 | 1.374145  |
| C | -5.488073 | -0.132879 | 0.204903  |
| O | -6.167682 | -1.000773 | 0.714495  |
| O | -5.997202 | 0.926068  | -0.455028 |
| C | -7.433380 | 0.974519  | -0.523374 |
| H | -7.669331 | 1.876235  | -1.087372 |
| H | -7.821354 | 0.088237  | -1.030918 |
| H | -7.861597 | 1.023601  | 0.480620  |
| C | 1.658012  | 4.001040  | -0.462944 |
| C | 1.901398  | 2.492726  | -0.181034 |
| O | 3.009790  | 2.002482  | -0.330609 |
| O | 0.796725  | 1.920829  | 0.187289  |
| F | 1.364746  | 4.645254  | 0.682814  |
| F | 2.737404  | 4.571334  | -1.004726 |
| F | 0.621931  | 4.161871  | -1.310825 |
| B | 2.881221  | -1.705544 | -2.300332 |
| C | 1.772249  | -0.487130 | -1.715913 |
| H | 4.032906  | -1.452476 | -2.245801 |
| H | 2.270719  | 0.419924  | -1.389780 |

### 50-ts

Zero-point correction= 0.382322

Thermal correction to Energy= 0.413878

Thermal correction to Enthalpy= 0.414822

Thermal correction to Gibbs Free Energy= 0.318987

Sum of electronic and zero-point Energies= -1764.234502

Sum of electronic and thermal Energies= -1764.202946

Sum of electronic and thermal Enthalpies= -1764.202002

Sum of electronic and thermal Free Energies= -1764.297837

### Cartesian coordinates

|   |           |           |           |
|---|-----------|-----------|-----------|
| B | -0.481206 | -2.289603 | -1.723090 |
| B | 1.615349  | -1.247345 | -3.393278 |
| B | 0.149928  | -0.794173 | -2.491821 |
| B | 1.741218  | -0.456071 | -1.797255 |
| B | 0.239941  | -2.372096 | -3.345457 |
| B | 0.601774  | -3.644199 | -2.138629 |

|    |           |           |           |
|----|-----------|-----------|-----------|
| B  | 1.883498  | -3.004092 | -3.198334 |
| B  | 2.192463  | -3.314912 | -1.482350 |
| H  | 2.355486  | 0.531611  | -1.634275 |
| H  | 3.027474  | -4.032981 | -1.055979 |
| H  | 0.594305  | -3.338009 | 0.507882  |
| H  | 0.223231  | -4.762960 | -2.222994 |
| H  | 2.525018  | -3.600176 | -3.992301 |
| H  | -0.415723 | -2.578025 | -4.309972 |
| H  | 2.071176  | -0.681241 | -4.324783 |
| H  | -0.533523 | 0.084023  | -2.879565 |
| H  | -1.633514 | -2.467875 | -1.527152 |
| C  | 2.979307  | -1.617162 | 0.452982  |
| H  | 3.640414  | -2.462884 | 0.669102  |
| N  | 2.805226  | -0.677047 | 1.295291  |
| C  | 3.102412  | -0.898813 | 2.695289  |
| H  | 3.401517  | 0.033883  | 3.179419  |
| H  | 3.860125  | -1.670005 | 2.876986  |
| C  | 1.742395  | -1.395564 | 3.305112  |
| O  | 1.732850  | -1.913302 | 4.400051  |
| O  | 0.668447  | -1.245263 | 2.545697  |
| Pd | 0.771893  | 0.202390  | 1.100433  |
| C  | 2.682984  | -1.860605 | -2.235556 |
| C  | 2.075079  | -1.762551 | -0.735589 |
| B  | 0.739959  | -2.832031 | -0.549538 |
| B  | 0.384004  | -1.074134 | -0.744114 |
| C  | -1.124057 | -0.210606 | 0.361687  |
| C  | -1.812663 | 0.757471  | -0.401014 |
| C  | -1.862589 | -1.136179 | 1.135532  |
| C  | -3.204232 | 0.768064  | -0.421563 |
| H  | -1.257517 | 1.468023  | -1.001178 |
| C  | -3.249945 | -1.119302 | 1.106149  |
| H  | -1.344745 | -1.852075 | 1.762277  |
| C  | -3.928194 | -0.169171 | 0.327887  |
| H  | -3.731583 | 1.504229  | -1.016928 |
| H  | -3.829910 | -1.827293 | 1.688207  |
| C  | -5.423859 | -0.197617 | 0.344570  |
| O  | -6.081081 | -1.000253 | 0.976701  |
| O  | -5.963820 | 0.771603  | -0.421528 |
| C  | -7.401001 | 0.804209  | -0.448438 |
| H  | -7.662877 | 1.637298  | -1.099940 |
| H  | -7.797355 | -0.134273 | -0.843555 |
| H  | -7.798695 | 0.960472  | 0.557201  |
| C  | 1.677703  | 4.140123  | -0.528765 |
| C  | 0.988655  | 2.756597  | -0.714664 |

|   |          |           |           |
|---|----------|-----------|-----------|
| O | 1.162892 | 2.039725  | 0.347602  |
| O | 0.412220 | 2.496236  | -1.756673 |
| F | 1.480410 | 4.925323  | -1.592476 |
| F | 1.197838 | 4.772691  | 0.558756  |
| F | 3.007926 | 3.979756  | -0.364583 |
| H | 3.748811 | -1.682322 | -2.311874 |

## 51

Zero-point correction= 0.177396

Thermal correction to Energy= 0.185090

Thermal correction to Enthalpy= 0.186034

Thermal correction to Gibbs Free Energy= 0.146630

Sum of electronic and zero-point Energies= -331.935142

Sum of electronic and thermal Energies= -331.927448

Sum of electronic and thermal Enthalpies= -331.926504

Sum of electronic and thermal Free Energies= -331.965908

### Cartesian coordinates

|   |           |           |           |
|---|-----------|-----------|-----------|
| B | 1.452861  | -0.030438 | 0.910335  |
| B | -0.860024 | 1.458932  | 0.023928  |
| B | 0.923631  | 1.420114  | 0.024603  |
| B | 0.019603  | 0.893044  | 1.461153  |
| B | -0.019216 | -0.889010 | 1.463740  |
| B | -1.452559 | 0.033165  | 0.910914  |
| B | -0.923591 | -1.419883 | 0.028927  |
| H | -1.532142 | -2.420736 | -0.135834 |
| H | 1.425629  | -2.484695 | -0.136828 |
| H | -0.032793 | -1.531288 | 2.459904  |
| H | -2.478638 | 0.057064  | 1.503164  |
| H | 0.033601  | 1.538168  | 2.455479  |
| H | -1.424462 | 2.484880  | -0.143374 |
| H | 1.532945  | 2.419936  | -0.143497 |
| H | 2.479049  | -0.052554 | 1.502469  |
| C | -0.018564 | -0.813782 | -1.273872 |
| B | 0.860045  | -1.458931 | 0.027666  |
| B | 1.455400  | -0.032648 | -0.853634 |
| B | -1.455856 | 0.030268  | -0.853316 |
| C | 0.017999  | 0.809956  | -1.276202 |
| H | -2.332055 | 0.049602  | -1.644515 |
| H | 0.028066  | 1.285194  | -2.248765 |
| H | 2.331810  | -0.053157 | -1.644603 |
| H | -0.029090 | -1.292516 | -2.244747 |

**AgI**

Zero-point correction= 0.003057

Thermal correction to Energy= 0.020049

Thermal correction to Enthalpy= 0.020994

Thermal correction to Gibbs Free Energy= -0.054089

Sum of electronic and zero-point Energies= -628.976681

Sum of electronic and thermal Energies= -628.959689

Sum of electronic and thermal Enthalpies= -628.958744

Sum of electronic and thermal Free Energies= -629.033827

Cartesian coordinates

|    |           |           |           |
|----|-----------|-----------|-----------|
| Ag | 0.000000  | 1.580685  | -1.118369 |
| I  | 0.000000  | 2.459335  | 1.738001  |
| I  | 2.459432  | 0.000000  | -1.737978 |
| Ag | 1.580756  | 0.000000  | 1.118343  |
| Ag | -1.580756 | 0.000000  | 1.118343  |
| I  | 0.000000  | -2.459335 | 1.738001  |
| I  | -2.459432 | 0.000000  | -1.737978 |
| Ag | 0.000000  | -1.580685 | -1.118369 |

**AgTFA**

Zero-point correction= 0.027548

Thermal correction to Energy= 0.035539

Thermal correction to Enthalpy= 0.036483

Thermal correction to Gibbs Free Energy= -0.008875

Sum of electronic and zero-point Energies= -671.933428

Sum of electronic and thermal Energies= -671.925438

Sum of electronic and thermal Enthalpies= -671.924494

Sum of electronic and thermal Free Energies= -671.969852

Cartesian coordinates

|    |           |           |           |
|----|-----------|-----------|-----------|
| C  | -2.219714 | 0.002921  | 0.000081  |
| C  | -0.671858 | 0.038699  | -0.000163 |
| O  | -0.107965 | 1.161172  | -0.000205 |
| O  | -0.108147 | -1.088797 | -0.000176 |
| F  | -2.664650 | -0.652401 | 1.088657  |
| F  | -2.664880 | -0.646917 | -1.091763 |
| F  | -2.757072 | 1.229633  | 0.003259  |
| Ag | 1.954420  | -0.004288 | 0.000046  |

**ArI**

Zero-point correction= 0.133099

Thermal correction to Energy= 0.143563

Thermal correction to Enthalpy= 0.144508

Thermal correction to Gibbs Free Energy= 0.094559

Sum of electronic and zero-point Energies= -470.774245



Sum of electronic and thermal Energies= -470.763781  
Sum of electronic and thermal Enthalpies= -470.762836  
Sum of electronic and thermal Free Energies= -470.812785

Cartesian coordinates

|   |           |           |           |
|---|-----------|-----------|-----------|
| C | -0.083130 | -1.130892 | 0.000004  |
| C | 1.308233  | -1.049137 | -0.000001 |
| C | 1.942947  | 0.199501  | -0.000003 |
| C | 1.171056  | 1.367893  | -0.000014 |
| C | -0.220243 | 1.298323  | -0.000013 |
| C | -0.834524 | 0.044865  | 0.000001  |
| H | -0.570898 | -2.098723 | 0.000013  |
| H | 1.903698  | -1.954905 | 0.000001  |
| H | 1.678079  | 2.327109  | -0.000025 |
| H | -0.812765 | 2.206181  | -0.000013 |
| I | -2.972701 | -0.082047 | 0.000001  |
| C | 3.426560  | 0.343953  | -0.000005 |
| O | 4.012529  | 1.408935  | 0.000027  |
| O | 4.059653  | -0.850761 | -0.000005 |
| C | 5.494333  | -0.784144 | -0.000005 |
| H | 5.855028  | -0.259931 | 0.888474  |
| H | 5.836152  | -1.818966 | -0.000051 |
| H | 5.855026  | -0.259849 | -0.888436 |

#### **HTFA**

Zero-point correction= 0.039253  
Thermal correction to Energy= 0.045499  
Thermal correction to Enthalpy= 0.046444  
Thermal correction to Gibbs Free Energy= 0.007745  
Sum of electronic and zero-point Energies= -526.742319  
Sum of electronic and thermal Energies= -526.736072  
Sum of electronic and thermal Enthalpies= -526.735128  
Sum of electronic and thermal Free Energies= -526.773827

Cartesian coordinates

|   |           |           |           |
|---|-----------|-----------|-----------|
| C | 0.600745  | -0.000690 | 0.000015  |
| C | -0.934489 | 0.159693  | 0.000009  |
| O | -1.497497 | 1.222466  | -0.000060 |
| O | -1.520401 | -1.045515 | -0.000012 |
| H | -2.481712 | -0.897412 | -0.000027 |
| F | 1.188198  | 1.196203  | -0.000271 |
| F | 0.996319  | -0.679636 | 1.090375  |
| F | 0.996301  | -0.680146 | -1.090054 |
